# Supplementary material
Source: ML conference proceedings conference paper supplement (https://openreview.net/forum?id=EGYwfs4XhI)
Supplement: supplementary_material [file LLE_NeurIPS_submit_paper_ID_15962.pdf › supplementary_NeurIPS_paper_ID_15962/LLE_NeurIPS_submit_paper_ID_15962.pdf]

---

# Improving Diffusion-based Inverse Algorithms under Few-Step Constraint via Linear Extrapolation

---

Anonymous Author(s)

Affiliation

Address

email

## Abstract

1        Diffusion-based inverse algorithms have shown remarkable performance across  
2        various inverse problems, yet their reliance on numerous denoising steps incurs high  
3        computational costs. While recent developments of fast diffusion ODE solvers offer  
4        effective acceleration for diffusion sampling without observations, their application  
5        in inverse problems remains limited due to the heterogeneous formulations of  
6        inverse algorithms and their prevalent use of approximations and heuristics, which  
7        often introduce significant errors that undermine the reliability of analytical solvers.  
8        In this work, we begin with an analysis of ODE solvers for inverse problems that  
9        reveals a linear combination structure of approximations for the inverse trajectory.  
10       Building on this insight, we propose a canonical form that unifies a broad class of  
11       diffusion-based inverse algorithms and facilitates the design of more generalizable  
12       solvers. Inspired by the linear subspace search strategy, we propose Learnable  
13       Linear Extrapolation (LLE), a lightweight approach that universally enhances the  
14       performance of any diffusion-based inverse algorithm conforming to our canonical  
15       form. LLE optimizes the combination coefficients to refine current predictions  
16       using previous estimates, alleviating the sensitivity of analytical solvers for inverse  
17       algorithms. Extensive experiments demonstrate consistent improvements of the  
18       proposed LLE method across multiple algorithms and tasks, indicating its potential  
19       for more efficient solutions and boosted performance of diffusion-based inverse  
20       algorithms with limited steps.

## 21    1 Introduction

22    Diffusion models have demonstrated remarkable capability in modeling complex data priors [1, 2, 3,  
23    4], which has led to their widespread application in solving inverse problems. Extensive efforts have  
24    been devoted to the development of diffusion-based inverse algorithms [5, 6, 7, 8, 9, 10, 11, 12, 13, 14],  
25    achieving impressive performance in numerous tasks including inpainting [15], super-resolution [16],  
26    deblurring [17], and compressed sensing [18].

27    One major drawback of diffusion-based inverse algorithms is the need for multiple neural network  
28    inferences, resulting in high computational complexity. Directly reducing the number of inference  
29    steps often degrades the performance of these inverse algorithms. Therefore, enhancing the perfor-  
30    mance of diffusion-based inverse algorithms under limited steps has emerged as a critical research  
31    direction, leading to several recent attempts such as shortcut sampling [19, 20], learned correction  
32    processes [21], and the introduction of conjugate integrators [22]. Recently, high-order diffusion ODE  
33    solvers [23, 24, 25, 26, 27] have shown strong performance in the few-step sampling of diffusion  
34    models without observations. However, although conceptually these solvers can also accelerate  
35    inverse algorithms, two challenges remain in practice. First, not all inverse algorithms admit an  
36    explicit ODE or SDE formulation, necessitating a more general framework to unify their analysis

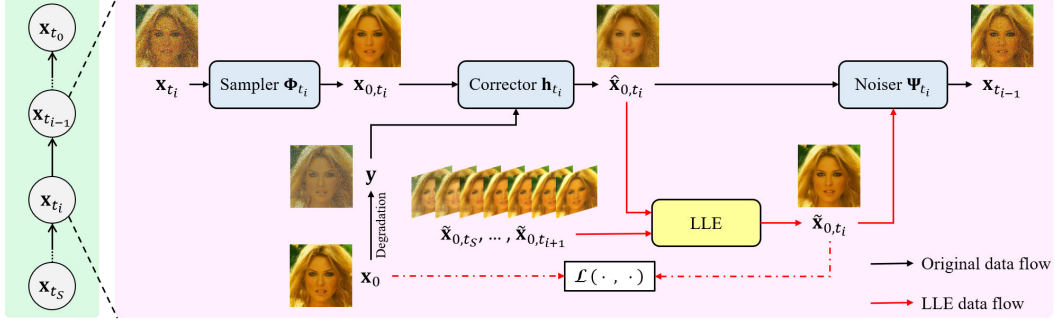

Figure 1: The proposed canonical form of diffusion-based inverse algorithms and the workflow of our LLE method. Our canonical form decomposes an inverse algorithm into three key modules: Sampler, Corrector, and Noiser, providing a unified framework that encompasses a wide range of existing approaches. The LLE method learns a linear combination of the current corrected estimate and previous results to obtain a better estimation of the original image, therefore universally enhancing diffusion-based inverse algorithms’ performance under few steps.

and the design of generalizable solvers. Second, the prevalence of approximations and heuristics in existing methods often leads to substantial estimation errors, undermining the reliability of analytical high-order solvers.

To tackle these challenges, we begin with an analysis of ODE solvers in inverse problems from the perspective of posterior sampling, revealing an equivalent interpretation in the form of linear combinations. Based on the insights, we propose a canonical form for diffusion-based inverse algorithms, which serves as a unifying framework for a broad class of existing methods, facilitating a more systematic understanding and more generalizable development of inverse problem solvers. Building on this canonical form, we design a universal enhancement strategy for diffusion-based inverse algorithms inspired by optimal linear subspace search [27]. Our proposed method, termed Learnable Linear Extrapolation (LLE), learns a set of linear combination coefficients to boost current corrected estimate with previous results, thereby mitigating the unreliability of analytical high-order solvers under large estimation errors or heuristics. For linear inverse problems, we further leverage the structure of the observation function by decoupling the coefficients associated with the range space and null space, leading to enhanced performance for LLE.

LLE is highly lightweight and can be trained with 50 diffusion-generated samples within minutes on a single NVIDIA RTX 3090 GPU, which makes it practical and easy to integrate into existing inverse algorithms. We reformulate nine mainstream diffusion-based inverse algorithms into the proposed canonical form and conduct extensive experiments to validate the effectiveness of LLE in both linear and nonlinear tasks. The results demonstrate that LLE effectively improves the performance of these algorithms under few steps, providing a novel and more general perspective to enhance diffusion-based inverse algorithms in the future.

## 2 Backgrounds

### 2.1 Diffusion models

Diffusion models [1, 2, 28] consist of a forward diffusion process that transforms a clean data distribution into a pure Gaussian distribution, and a reverse denoising process that generates clean data from the noise distribution. In this paper, we consider the setting of Variance Preserving (VP) diffusion. Given a target data distribution  $q(\mathbf{x}_0)$ , the forward diffusion process is modeled by the following stochastic differential equation (SDE):

$$d\mathbf{x}_t = f(t)\mathbf{x}_t dt + g(t)d\mathbf{w}_t, \quad t \in [0, T], \quad (1)$$

where  $\mathbf{x}_0 \sim q(\mathbf{x}_0)$  and  $\mathbf{w}_t$  is a standard Wiener process. VP diffusion specifies the drift term  $f(t)$  and the diffusion term  $g(t)$  as

$$f(t) = \frac{d \log \sqrt{\alpha_t}}{dt}, \quad g^2(t) = \frac{d(1 - \alpha_t)}{dt} - 2 \frac{d \log \sqrt{\alpha_t}}{dt} (1 - \alpha_t),$$

respectively, where  $\bar{\alpha}_t$  is a predefined monotonic parameter controlling the noise level at each timestep, with  $\bar{\alpha}_0 = 1$  and  $\bar{\alpha}_T = 0$ .

The forward SDE (1) can be exactly reversed as [29]

$$d\mathbf{x}_t = (f(t)\mathbf{x}_t - g^2(t)\nabla_{\mathbf{x}_t} \log q_t(\mathbf{x}_t)) dt + g(t)d\bar{\mathbf{w}}_t,$$

where  $\bar{\mathbf{w}}_t$  is the reverse-time standard Wiener process,  $\mathbf{x}_T \sim \mathcal{N}(\mathbf{0}, \mathbf{I})$ , and  $\nabla_{\mathbf{x}_t} \log q_t(\mathbf{x}_t)$  is known as the (Stein) score function [30, 31]. Practical implementation aims to estimate the unknown score function  $\nabla_{\mathbf{x}_t} \log q_t(\mathbf{x}_t)$  via a parameterized neural network  $\epsilon_\theta(\mathbf{x}_t, t)$  as

$$\epsilon_\theta(\mathbf{x}_t, t) = -\sqrt{1 - \bar{\alpha}_t} \nabla_{\mathbf{x}_t} q_t(\mathbf{x}_t), \quad (2)$$

which can be learned via score matching [32, 33].

Song *et al.* [34] demonstrate that the above reverse SDE shares the same marginal distributions as the following reverse-time ordinary differential equation (ODE):

$$\frac{d\mathbf{x}_t}{dt} = f(t)\mathbf{x}_t - \frac{1}{2}g^2(t)\nabla_{\mathbf{x}_t} \log q_t(\mathbf{x}_t), \quad (3)$$

which facilitates the introduction of efficient ODE solvers to enhance sampling efficiency. Using a first-order solver to solve the diffusion ODE (3) leads to the iterative formula of the well-known DDIM sampler [3], which is

$$\mathbf{x}_{t-1} = \sqrt{\bar{\alpha}_{t-1}} \frac{\mathbf{x}_t - \sqrt{1 - \bar{\alpha}_t} \epsilon_\theta(\mathbf{x}_t, t)}{\sqrt{\bar{\alpha}_t}} + \sqrt{1 - \bar{\alpha}_{t-1}} \epsilon_\theta(\mathbf{x}_t, t).$$

## 2.2 High-order solvers for diffusion ODE

Numerous works have developed a variety of fast ODE solvers for diffusion models [35, 23, 24, 25, 26, 36, 37]. Recent studies have adopted exponential integrators [38] to solve the diffusion ODE as follows

$$\mathbf{x}_t = \frac{\sqrt{\bar{\alpha}_t}}{\sqrt{\bar{\alpha}_s}} \mathbf{x}_s - \sqrt{\bar{\alpha}_t} \int_{\lambda(s)}^{\lambda(t)} \exp(-\lambda) \epsilon_\theta(\mathbf{x}_{t(\lambda)}, t(\lambda)) d\lambda,$$

where  $\lambda(t) = \log \sqrt{\bar{\alpha}_t / (1 - \bar{\alpha}_t)}$ . High-order diffusion ODE-solvers [23, 24, 26, 25] leverage the Taylor expansions of  $\epsilon_\theta(\cdot, \cdot)$  estimated from previous score functions to solve the integral more accurately, which reduces the dependency on small step sizes and enables efficient sampling with fewer steps. Despite differences in derivation and specific formulation, these solvers share a common structure in that  $\mathbf{x}_t$  can be expressed as a linear combination of the initial point and the scores from all previous steps [27], i.e.,

$$\mathbf{x}_t \in \text{span} \{ \mathbf{x}_T, \epsilon_\theta(\mathbf{x}_T, T), \dots, \epsilon_\theta(\mathbf{x}_{t+1}, t+1) \}. \quad (4)$$

Thus [27] proposes the optimal subspace search method to optimize the coefficients of  $\mathbf{x}_t$  in the subspace shown in (4), aiming to align the trajectory of a few-step solver with a target solver using more steps (e.g., a 999-step DDIM). The learnable solver achieves remarkable performance with few steps while remaining lightweight as it only requires learning a set of linear combination coefficients per timestep. In this paper, we design a lightweight learnable method tailored for inverse algorithms to generally enhance their performance under few steps leveraging similar insights from the optimal subspace search approach.

## 2.3 Diffusion-based inverse algorithms

Consider the degradation equation

$$\mathbf{y} = \mathcal{A}(\mathbf{x}_0) + \sigma_{\mathbf{y}} \mathbf{n}, \quad \mathbf{n} \sim \mathcal{N}(\mathbf{0}, \mathbf{I}), \quad (5)$$

where  $\mathcal{A}$  is the degradation function,  $\mathbf{y}$  is the observation, and  $\sigma_{\mathbf{y}}$  is the standard deviation of the observation noise. The goal of inverse problems is to recover the original data  $\mathbf{x}_0$  from the degraded observation  $\mathbf{y}$ . The ability of diffusion models to capture complex data priors has inspired a wide range of studies exploring their applications in inverse problems from diverse perspectives.

DDRM [5] defines a new set of variational distributions to approximate the posterior  $q(\mathbf{x}_0|\mathbf{y})$  and derives an inverse algorithm for linear problems based on projection operations. DDNM [6] directly employs the null-range decomposition and heuristically projects the intermediate estimation of  $\mathbf{x}_0$  during sampling onto the hyperplane corresponding to the linear observation. Posterior sampling methods [8, 7, 10] attempt to estimate the conditional score  $\nabla_{\mathbf{x}_t} \log q_t(\mathbf{x}_t|\mathbf{y})$  to sample from the posterior distribution  $q(\mathbf{x}_0|\mathbf{y})$ . DiffPIR [9] proposes a plug-and-play approach by guiding the intermediate estimation of  $\mathbf{x}_0$  with a proximal point problem and further refining the reverse sampling trajectory. ReSample [12], originally designed for latent diffusion, can be interpreted as optimizing the intermediate estimation via gradient descent to enforce hard data consistency and guiding the reverse sampling trajectory with a resample algorithm. More recently, maximum a posteriori (MAP)-based methods such as RED-diff [11] have gained attention, which explicitly express the data prior  $q(\mathbf{x}_0)$  using diffusion models and solve inverse problems by optimizing  $\max_{\mathbf{x}_0} q(\mathbf{x}_0|\mathbf{y})$ . DAPS [14] adopts Langevin dynamics to enforce consistency with the observations and progressively anneals the timestep to achieve noise reduction.

Despite the effectiveness of diffusion-based inverse algorithms, they typically require 100 to 1000 steps during inference. In this paper, we first establish a canonical form for these algorithms and then propose a lightweight and general approach to enhance their performance under few steps, achieving a better trade-off between performance and computational efficiency.

### 3 Analysis of ODE solvers in inverse problems

It can be shown that the associated probability flow ODE for sampling from the posterior distribution  $p(\mathbf{x}_0|\mathbf{y})$  is given by

$$\frac{d\mathbf{x}_t}{dt} = f(t)\mathbf{x}_t - \frac{1}{2}g^2(t)\nabla_{\mathbf{x}_t} \log p(\mathbf{x}_t|\mathbf{y}). \quad (6)$$

In the context of inverse problems, the primary focus is to restore the clean signal. Thus we define

$$\mathbf{x}_0(t, \mathbf{y}) = \frac{\mathbf{x}_t + (1 - \bar{\alpha}_t)\nabla_{\mathbf{x}_t} \log p(\mathbf{x}_t|\mathbf{y})}{\sqrt{\bar{\alpha}_t}}. \quad (7)$$

To assist our analysis, we assume the temporal discretization for the numerical solver as  $\{t_S, t_{S-1}, \dots, t_0\} \subseteq [0, T]$  with  $t_S > t_{S-1} > \dots > t_0 = 0$ , and  $S$  denoting the total number of steps. Then the evolution of  $\mathbf{x}_0(t, \mathbf{y})$  from  $t_{i+1}$  to  $t_i$  can be described as the following proposition.

**Proposition 1.** *The evolution of  $\mathbf{x}_0(t, \mathbf{y})$  follows*

$$\begin{aligned} \mathbf{x}_0(t_i, \mathbf{y}) &= \frac{\sqrt{1 - \bar{\alpha}_{t_i}}}{\sqrt{1 - \bar{\alpha}_{t_{i+1}}}} \frac{\sqrt{\bar{\alpha}_{t_{i+1}}}}{\sqrt{\bar{\alpha}_{t_i}}} \mathbf{x}_0(t_{i+1}, \mathbf{y}) - \underbrace{\frac{\sqrt{1 - \bar{\alpha}_{t_i}}}{\sqrt{\bar{\alpha}_{t_i}}} \int_{t_{i+1}}^{t_i} \phi(\tau) \mathbf{x}_0(\tau, \mathbf{y}) d\tau}_{(*)} \\ &\quad + \underbrace{\frac{\sqrt{1 - \bar{\alpha}_{t_i}}}{\sqrt{\bar{\alpha}_{t_i}}} \left( \sqrt{1 - \bar{\alpha}_{t_i}} \nabla_{\mathbf{x}_{t_i}} \log p(\mathbf{x}_{t_i}|\mathbf{y}) - \sqrt{1 - \bar{\alpha}_{t_{i+1}}} \nabla_{\mathbf{x}_{t_{i+1}}} \log p(\mathbf{x}_{t_{i+1}}|\mathbf{y}) \right)}_{(**)}, \end{aligned} \quad (8)$$

where  $\phi(\tau) = \frac{g^2(\tau)\sqrt{\bar{\alpha}_\tau}}{2(1 - \bar{\alpha}_\tau)^{3/2}}$ .

The detailed derivations are deferred to Appendix B. Note that term  $(*)$  contains an integral involving  $\mathbf{x}_0(\tau, \mathbf{y})$ , which can be approximated using a standard  $k$ -th order Taylor expansion, i.e.,

$$\int_{t_{i+1}}^{t_i} \phi(\tau) \mathbf{x}_0(\tau, \mathbf{y}) d\tau = \sum_{l=0}^k \frac{d^l \mathbf{x}_0(t_{i+1}, \mathbf{y})}{dt_{i+1}^l} \int_{t_{i+1}}^{t_i} \frac{(\tau - t_{i+1})^l}{l!} \phi(\tau) d\tau + \mathcal{O}((t_{i+1} - t_i)^{k+1}), \quad (9)$$

The high-order derivatives  $\frac{d^l \mathbf{x}_0(t_{i+1}, \mathbf{y})}{dt_{i+1}^l}$  in (9) can be estimated using multi-step methods. In particular, under uniform time discretization  $t_{j+1} - t_j = h$ ,  $\forall j$ , the forward differences approximation of the  $l$ -th derivative yields

$$\frac{d^l \mathbf{x}_0(t_{i+1}, \mathbf{y})}{dt_{i+1}^l} \approx \frac{1}{h^l} \sum_{j=0}^l (-1)^{l-j} \binom{l}{j} \mathbf{x}_0(t_{i+1+j}, \mathbf{y}), \quad (10)$$



135 which implies that the Taylor expansion approximation for (\*) is a linear combination of previous  
 136 steps  $\mathbf{x}_0(t_j, \mathbf{y})$ , for  $j \geq i + 1$ .

137 Term (\*\*) involves the score at both time steps  $t_{i+1}$  and  $t_i$ , which can be reformulated as

$$\frac{\sqrt{\bar{\alpha}_{t_i}}}{\sqrt{1 - \bar{\alpha}_{t_i}}} \left( \underbrace{\frac{(1 - \bar{\alpha}_{t_i}) \nabla_{\mathbf{x}_{t_i}} \log p(\mathbf{x}_{t_i} | \mathbf{y}) + \hat{\mathbf{x}}_{t_i}}{\sqrt{\bar{\alpha}_{t_i}}}}_{\text{An estimate of } \mathbf{x}_0(t_i, \mathbf{y})} - \mathbf{x}_0(t_{i+1}, \mathbf{y}) \right), \quad (11)$$

138 where

$$\hat{\mathbf{x}}_{t_i} = \sqrt{\bar{\alpha}_{t_i}} \mathbf{x}_0(t_{i+1}, \mathbf{y}) - \sqrt{(1 - \bar{\alpha}_{t_i})(1 - \bar{\alpha}_{t_{i+1}})} \nabla_{\mathbf{x}_{t_{i+1}}} \log p(\mathbf{x}_{t_{i+1}} | \mathbf{y}). \quad (12)$$

139 Note that  $\hat{\mathbf{x}}_{t_i}$  serves as the sample calculated by a deterministic DDIM sampler. Consequently, the  
 140 reformulation (11) can be interpreted as a linear combination of a coarse estimation at the current  
 141 time step  $t_i$  and the previous result at time  $t_{i+1}$ . Based on the above analysis on terms (\*) and (\*\*),  
 142 we arrive at the following conclusion.

143 **Corollary 2.** *Approximating the evolution of  $\mathbf{x}_0(t, \mathbf{y})$  from  $t_{i+1}$  to  $t_i$  can be interpreted as computing*  
 144 *a linear combination of an estimate of the current step  $t_i$  and all previous results at  $t_j$  for  $\forall j \geq i + 1$ .*

145 This insight provides a foundation for generalizing diffusion ODE solvers to a broad class of inverse  
 146 algorithms. Conceptually, for most algorithms that are difficult to characterize via posterior sampling,  
 147 we reinterpret  $\mathbf{x}_0(t, \mathbf{y})$  as an estimate of the clean sample at time  $t$  corrected with the observation  
 148  $\mathbf{y}$ . Meanwhile, the linear combination structure enables learning the combination coefficients in  
 149 a data-driven manner, thus avoiding the failure of analytical coefficients when the posterior score  
 150 estimation is highly inaccurate or heuristic.

## 151 4 Designing unified solvers for inverse algorithms

152 In this section, we first establish a canonical form that unifies a wide range of diffusion-based inverse  
 153 algorithms and clarify its connection to the analysis in Section 3. We then propose the LLE method,  
 154 which is compatible with any algorithm adhering to the canonical form and effectively improves their  
 155 performance in the few-step regime by learning a set of linear combination coefficients.

### 156 4.1 A canonical form for diffusion-based inverse algorithms

157 As illustrated in Figure 1, our proposed canonical form decomposes each iteration of an inverse  
 158 algorithm into three modules. Below we detail these modules at step  $t_i$  for any  $1 \leq i \leq S$ .

159 **(1) Sampler** generates an estimate of the clean data  $\mathbf{x}_{0,t_i}$  from the noisy input  $\mathbf{x}_{t_i}$  using a pre-trained  
 160 diffusion model:

$$\mathbf{x}_{0,t_i} = \Phi_{t_i}(\mathbf{x}_{t_i}). \quad (13)$$

161 **(2) Corrector** incorporates the observation  $\mathbf{y}$  to refine the sampled result, ensuring consistency with  
 162 the measurement:

$$\hat{\mathbf{x}}_{0,t_i} = \mathbf{h}_{t_i}(\mathbf{x}_{0,t_i}, \mathcal{A}, \mathbf{y}). \quad (14)$$

163 **(3) Noiser** maps the corrected clean sample back to the next noise level for the subsequent iteration:

$$\mathbf{x}_{t_{i-1}} = \Psi_{t_i}(\hat{\mathbf{x}}_{0,t_i}). \quad (15)$$

164 One immediate advantage of this decomposition is that (14) broadens the definition of  $\mathbf{x}_0(t_i, \mathbf{y})$  in  
 165 (7), which is applicable to a wider range of inverse algorithms beyond posterior sampling, including  
 166 but not limited to projection-based and plug-and-play approaches. Another benefit lies in that, by  
 167 decoupling an inverse algorithm into discrete modules, we can reorganize these modules and directly  
 168 obtain an estimate at  $t_i$  from the results at  $t_{i+1}$  as

$$\hat{\mathbf{x}}_{0,t_i} = \mathbf{h}_{t_i} \circ \Phi_{t_i} \circ \Psi_{t_{i+1}}(\hat{\mathbf{x}}_{0,t_{i+1}}), \quad (16)$$

169 which provides an effective alternative to the approximation term in (11). Consequently, we can  
 170 construct unified solvers for any inverse algorithms conforming to the proposed canonical form,  
 171 requiring only the specification of a set of linear combination coefficients, which we propose to  
 172 optimize in a data-driven manner.

173 This modular decomposition is applicable to a broad class of inverse algorithms. In this work, we  
 174 reformulate nine mainstream inverse algorithms into the proposed canonical form, with detailed  
 175 decompositions presented in Appendix D.

## 176 4.2 Iterative learnable linear extrapolation

177 Intuitively, the proposed LLE method attempts to enhance the performance of inverse algorithms  
 178 under few steps by iteratively learning a linear combination of the corrected sample (14) at  $t_i$  and  
 179 all previous results at  $t_j, j > i$ , to obtain a better estimate  $\tilde{\mathbf{x}}_{0,t_i}$ . Below, we introduce the training  
 180 objective of LLE at timestep  $t_i$  inductively.

181 Consider a reference training set generated by the diffusion model  $\mathbb{X} = \{\mathbf{x}_0^{(1)}, \mathbf{x}_0^{(2)}, \dots, \mathbf{x}_0^{(N)}\}$ ,  
 182 where  $N$  is the number of reference samples. Suppose we have obtained the estimates from the  
 183 previous  $S - i$  steps, i.e.,  $\tilde{\mathbf{x}}_{0,t_k}^{(n)}, k = i + 1, \dots, S, n = 1, \dots, N$ . Then we replace each  $\hat{\mathbf{x}}_{0,t_{i+1}}^{(n)}$  with  
 184  $\tilde{\mathbf{x}}_{0,t_{i+1}}^{(n)}$  in (16) and compute an estimate at step  $t_i$  as

$$\hat{\mathbf{x}}_{0,t_i}^{(n)} = \mathbf{h}_{t_i} \left( \Phi_{t_i} \left( \Psi_{t_{i+1}} \left( \tilde{\mathbf{x}}_{0,t_{i+1}}^{(n)} \right) \right), \mathcal{A}, \mathbf{y}^{(n)} \right), \quad (17)$$

185 where  $\mathbf{y}^{(n)}$  represents the observation of  $\mathbf{x}_0^{(n)}$ . Now we optimize a set of linear combination  
 186 coefficients, denoted as  $\gamma_{t_i,0}, \dots, \gamma_{t_i,S-i}$ , and update the estimates at step  $t_i$  as

$$\tilde{\mathbf{x}}_{0,t_i}^{(n)} = \gamma_{t_i,S-i} \hat{\mathbf{x}}_{0,t_i}^{(n)} + \sum_{j=0}^{S-i-1} \gamma_{t_i,j} \tilde{\mathbf{x}}_{0,t_{S-j}}^{(n)}. \quad (18)$$

187 Unlike unconditional generation tasks that often require sampling long trajectories as the training  
 188 targets for learning fast solvers, inverse problems provide explicit supervision in the form of known  
 189 ground-truth reconstructions. This eliminates the need to sample or store complete trajectories,  
 190 significantly reducing training cost. As a result, the optimization objective of LLE is formulated as:

$$\min_{\gamma_{t_i,0}, \dots, \gamma_{t_i,S-i}} \mathbb{E}_{n \sim \mathcal{U}\{1, \dots, N\}} \mathcal{L} \left( \tilde{\mathbf{x}}_{0,t_i}^{(n)}, \mathbf{x}_0^{(n)} \right), \quad (19)$$

191 where the loss function is chosen as

$$\mathcal{L} \left( \tilde{\mathbf{x}}_{0,t_i}^{(n)}, \mathbf{x}_0^{(n)} \right) = \mathcal{L}_{\text{MSE}} \left( \tilde{\mathbf{x}}_{0,t_i}^{(n)}, \mathbf{x}_0^{(n)} \right) + \omega \mathcal{L}_{\text{LPIPS}} \left( \tilde{\mathbf{x}}_{0,t_i}^{(n)}, \mathbf{x}_0^{(n)} \right). \quad (20)$$

192  $\mathcal{L}_{\text{MSE}}$  is the Mean-Square Error loss that measures the pixel-level discrepancy between samples,  
 193 while  $\mathcal{L}_{\text{LPIPS}}$  represents the Learned Perceptual Image Patch Similarity [39] loss that quantifies the  
 194 perceptual discrepancy between two samples.  $\omega$  is introduced in our loss function (20) as a weight  
 195 to balance the MSE loss and LPIPS loss. Smaller  $\omega$  encourages the algorithm to minimize MSE,  
 196 resulting in higher PSNR, whereas a larger  $\omega$  biases the algorithm toward minimizing LPIPS, leading  
 197 to higher perceptual similarity.

198 Once all coefficients are optimized, we fix them and perform inference in exactly the same manner as  
 199 the data flow in the training process. We defer the pseudo-code for the training and inference process  
 200 of LLE to Appendix G.

## 201 4.3 Decoupled coefficients for linear problems

202 For linear inverse problems, we propose using decoupled linear combination coefficients to estimate  
 203 the null-space and range-space components of a sample with respect to the observation matrix  
 204 separately. The rationale is that observations impose strong constraints on the range-space component,  
 205 while the null-space component remains more flexible. Consequently, decoupled sets of linear  
 206 combination coefficients would perform better to capture the differences between these components.

207 Consider the observation equation  $\mathbf{y} = \mathbf{A}\mathbf{x}_0 + \sigma_{\mathbf{y}}\mathbf{n}$ , where  $\mathbf{A}$  is the observation matrix. The range-  
 208 space and null-space components of a sample  $\mathbf{x}$  with respect to  $\mathbf{A}$  are denoted as  $\mathbf{x}^{\parallel} = \mathbf{A}^{\dagger} \mathbf{A} \mathbf{x}$  and  
 209  $\mathbf{x}^{\perp} = (\mathbf{I} - \mathbf{A}^{\dagger} \mathbf{A}) \mathbf{x}$ , respectively, where  $\mathbf{A}^{\dagger}$  represents the Moore-Penrose pseudoinverse of matrix  
 210  $\mathbf{A}$ . At timestep  $t_i$ , we optimize a set of coefficients  $\gamma_{t_i,j}^{\parallel}, \gamma_{t_i,j}^{\perp}, j = 0, \dots, S - i$  to estimate  $\tilde{\mathbf{x}}_{0,t_i}^{(n)}$  as

$$\tilde{\mathbf{x}}_{0,t_i}^{(n)} = \tilde{\mathbf{x}}_{0,t_i}^{(n),\parallel} + \tilde{\mathbf{x}}_{0,t_i}^{(n),\perp}, \quad (21)$$

Table 1: Results of DDNM, DDRM, IIGDM, DMPS, and DPS on noisy linear tasks ( $\sigma_y = 0.05$ ) on the CelebA-HQ dataset using 3 and 5 steps. The better results are bolded.

| Steps | Algorithm | Strategy | PSNR $\uparrow$ / SSIM $\uparrow$ / LPIPS $\downarrow$ |                              |                                     |                              |
|-------|-----------|----------|--------------------------------------------------------|------------------------------|-------------------------------------|------------------------------|
|       |           |          | Deblur (aniso)                                         | Inpainting                   | 4 $\times$ SR                       | CS 50%                       |
| 3     | DDNM      | -        | 27.80 / 0.758 / 0.319                                  | 16.64 / 0.442 / 0.492        | 27.09 / <b>0.773</b> / <b>0.296</b> | 16.55 / 0.441 / 0.539        |
|       |           | LLE      | <b>28.08 / 0.784 / 0.291</b>                           | <b>24.38 / 0.552 / 0.433</b> | <b>27.84</b> / 0.770 / 0.299        | <b>17.29 / 0.473 / 0.520</b> |
|       | DDRM      | -        | 27.68 / <b>0.795</b> / 0.277                           | 16.68 / 0.489 / 0.440        | 26.71 / <b>0.764</b> / <b>0.277</b> | 16.58 / 0.495 / 0.478        |
|       |           | LLE      | <b>27.69 / 0.795 / 0.271</b>                           | <b>24.53 / 0.625 / 0.406</b> | <b>27.49</b> / 0.761 / 0.295        | <b>17.07 / 0.527 / 0.470</b> |
|       | IIGDM     | -        | 20.39 / 0.536 / 0.520                                  | 19.57 / 0.533 / 0.495        | 20.73 / 0.552 / 0.500               | 16.79 / 0.472 / 0.555        |
|       |           | LLE      | <b>21.73 / 0.588 / 0.489</b>                           | <b>20.72 / 0.571 / 0.483</b> | <b>21.54 / 0.583 / 0.490</b>        | <b>17.30 / 0.487 / 0.540</b> |
|       | DMPS      | -        | 5.540 / 0.005 / 0.921                                  | 6.440 / 0.008 / 0.920        | 7.210 / 0.018 / 0.895               | 5.720 / 0.005 / 0.923        |
|       |           | LLE      | <b>11.45 / 0.043 / 0.813</b>                           | <b>11.52 / 0.069 / 0.816</b> | <b>18.11 / 0.237 / 0.788</b>        | <b>12.14 / 0.076 / 0.819</b> |
|       | DPS       | -        | 23.59 / 0.650 / 0.415                                  | 23.57 / 0.558 / 0.497        | <b>25.49</b> / 0.647 / 0.528        | 14.30 / 0.359 / 0.636        |
|       |           | LLE      | <b>24.59 / 0.675 / 0.405</b>                           | <b>27.51 / 0.748 / 0.366</b> | 24.57 / <b>0.666 / 0.465</b>        | <b>15.83 / 0.468 / 0.591</b> |
| 5     | DDNM      | -        | 29.63 / 0.819 / 0.259                                  | 22.76 / 0.550 / 0.431        | 28.97 / <b>0.818</b> / 0.262        | 18.20 / 0.474 / 0.491        |
|       |           | LLE      | <b>29.82 / 0.831 / 0.239</b>                           | <b>26.35 / 0.659 / 0.366</b> | <b>29.02</b> / 0.806 / <b>0.252</b> | <b>19.41 / 0.536 / 0.441</b> |
|       | DDRM      | -        | 29.29 / 0.826 / 0.244                                  | 23.21 / 0.717 / 0.286        | 28.58 / <b>0.811</b> / <b>0.247</b> | 18.34 / 0.599 / 0.389        |
|       |           | LLE      | <b>29.36 / 0.827 / 0.235</b>                           | <b>26.09 / 0.780 / 0.263</b> | <b>28.64</b> / 0.795 / 0.249        | <b>19.41 / 0.632 / 0.363</b> |
|       | IIGDM     | -        | 22.46 / 0.653 / 0.441                                  | 22.63 / 0.695 / 0.376        | 21.93 / 0.662 / 0.416               | 16.32 / 0.518 / 0.541        |
|       |           | LLE      | <b>25.95 / 0.734 / 0.347</b>                           | <b>25.21 / 0.735 / 0.336</b> | <b>25.67 / 0.731 / 0.338</b>        | <b>19.33 / 0.591 / 0.448</b> |
|       | DMPS      | -        | 5.780 / 0.007 / 0.917                                  | 6.480 / 0.008 / 0.920        | 9.220 / 0.036 / 0.900               | 5.880 / 0.006 / 0.922        |
|       |           | LLE      | <b>16.65 / 0.164 / 0.732</b>                           | <b>14.77 / 0.135 / 0.760</b> | <b>24.76 / 0.528 / 0.517</b>        | <b>14.66 / 0.155 / 0.742</b> |
|       | DPS       | -        | 23.94 / 0.680 / 0.369                                  | 25.14 / 0.617 / 0.434        | 26.07 / 0.675 / 0.470               | 17.12 / 0.515 / 0.481        |
|       |           | LLE      | <b>25.56 / 0.722 / 0.326</b>                           | <b>27.42 / 0.796 / 0.303</b> | <b>26.63 / 0.758 / 0.315</b>        | <b>17.73 / 0.536 / 0.468</b> |

where

$$\tilde{\mathbf{x}}_{0,t_i}^{(n),\parallel} = \gamma_{t_i,S-i}^{\parallel} \hat{\mathbf{x}}_{0,t_i}^{(n),\parallel} + \sum_{j=0}^{S-i-1} \gamma_{t_i,j}^{\parallel} \tilde{\mathbf{x}}_{0,t_{S-j}}^{(n),\parallel}, \quad \tilde{\mathbf{x}}_{0,t_i}^{(n),\perp} = \gamma_{t_i,S-i}^{\perp} \hat{\mathbf{x}}_{0,t_i}^{(n),\perp} + \sum_{j=0}^{S-i-1} \gamma_{t_i,j}^{\perp} \tilde{\mathbf{x}}_{0,t_{S-j}}^{(n),\perp}. \quad (22)$$

The optimization method and objective remain consistent with those described in Section 4.2.

## 5 Experiments

In this section, we validate the effectiveness of LLE across various inverse algorithms and tasks.

### 5.1 Experimental setup

**Inverse algorithms and hyperparameters.** We consider nine mainstream diffusion-based inverse algorithms with distinct formulations and design principles, including DDRM [5], DDNM [6], IIGDM [7], DMPS [10], DPS [8], DiffPIR [9], ReSample [12], RED-diff [11], and DAPS [14]. All these algorithms are decomposed following the canonical form described in Section 4.1, with the details provided in Appendix D. We evaluate the performance of all algorithms under total steps of  $S = 3, 4, 5, 7, 10, 15$ . Due to space constraints, we report part of the results in the main text and defer the complete results to Appendix H. For the training of LLE, we fix  $\omega = 0.1$  and utilize the schedule-free AdamW [40] to optimize the coefficients on 50 diffusion-generated samples. More training details are supplemented in Appendix F.

**Datasets and diffusion checkpoints.** Two datasets are used: CelebA-HQ [41] and FFHQ [42]. The checkpoint for CelebA-HQ is obtained from [43] and we follow [6] to use the 1k test set. The checkpoint for FFHQ is obtained from [8], and the evaluation follows [12, 14] with 100 randomly selected images from the validation set.

**Inverse problems and metrics.** We consider five inverse problems in this work: (1) gaussian deblurring (anisotropic), (2) inpainting (50% random), (3) 4 $\times$  super-resolution (average pooling), (4) compressed sensing (CS) with the Walsh-Hadamard transform (50% ratio), and (5) nonlinear deblurring. Except for nonlinear deblurring, all other four tasks are linear and we apply the decoupled coefficients method proposed in Section 4.3. The primary metrics include peak signal-to-noise ratio (PSNR), structural similarity index measure (SSIM) [44], and Learned Perceptual Image Patch Similarity (LPIPS) [39]. Results of Fréchet Inception Distance (FID) [45] are also included in the Appendix. All of the experiments are performed on a single NVIDIA RTX 3090 GPU.

Table 2: Nonlinear deblurring results of DPS, RED-diff, DiffPIR, ReSample, and DAPS using 3 and 10 steps. The better results are bolded.

| Steps | Algorithm | Strategy | PSNR $\uparrow$ / SSIM $\uparrow$ / LPIPS $\downarrow$ |                              |                              |                              |
|-------|-----------|----------|--------------------------------------------------------|------------------------------|------------------------------|------------------------------|
|       |           |          | FFHQ                                                   |                              | CelebA-HQ                    |                              |
|       |           |          | $\sigma_y = 0$                                         | $\sigma_y = 0.05$            | $\sigma_y = 0$               | $\sigma_y = 0.05$            |
| 3     | DPS       | -        | 15.75 / 0.403 / 0.646                                  | 15.75 / 0.402 / 0.647        | 16.09 / 0.408 / <b>0.575</b> | 16.09 / 0.407 / <b>0.575</b> |
|       |           | LLE      | <b>16.94 / 0.440 / 0.590</b>                           | <b>16.93 / 0.440 / 0.590</b> | <b>19.06 / 0.479 / 0.579</b> | <b>19.06 / 0.475 / 0.580</b> |
|       | RED-diff  | -        | 15.96 / 0.202 / 0.766                                  | 15.86 / 0.189 / 0.768        | 18.93 / 0.384 / 0.651        | 18.81 / 0.351 / 0.653        |
|       |           | LLE      | <b>16.71 / 0.241 / 0.744</b>                           | <b>16.61 / 0.223 / 0.745</b> | <b>20.50 / 0.417 / 0.610</b> | <b>20.31 / 0.381 / 0.610</b> |
|       | DiffPIR   | -        | 20.16 / 0.358 / 0.637                                  | <b>19.28 / 0.300 / 0.649</b> | 24.05 / 0.548 / 0.473        | 21.69 / 0.393 / 0.551        |
|       |           | LLE      | <b>20.56 / 0.436 / 0.595</b>                           | <b>19.13 / 0.300 / 0.646</b> | <b>24.73 / 0.633 / 0.428</b> | <b>21.70 / 0.402 / 0.546</b> |
|       | ReSample  | -        | 20.11 / 0.419 / 0.607                                  | 18.64 / 0.260 / 0.675        | 23.37 / 0.536 / 0.491        | 20.75 / 0.336 / 0.584        |
|       |           | LLE      | <b>20.33 / 0.426 / 0.604</b>                           | <b>18.86 / 0.271 / 0.673</b> | <b>24.40 / 0.598 / 0.457</b> | <b>21.03 / 0.353 / 0.578</b> |
|       | DAPS      | -        | 20.10 / 0.413 / 0.590                                  | 18.97 / 0.285 / 0.642        | 25.37 / 0.651 / 0.397        | <b>22.60 / 0.422 / 0.509</b> |
|       |           | LLE      | <b>20.21 / 0.424 / 0.581</b>                           | <b>19.10 / 0.291 / 0.637</b> | <b>25.68 / 0.677 / 0.382</b> | 22.55 / <b>0.423 / 0.516</b> |
| 10    | DPS       | -        | 20.39 / 0.542 / 0.457                                  | 20.30 / 0.536 / 0.463        | 23.76 / 0.675 / 0.351        | 23.74 / 0.673 / 0.350        |
|       |           | LLE      | <b>21.18 / 0.581 / 0.401</b>                           | <b>21.18 / 0.580 / 0.401</b> | <b>24.49 / 0.702 / 0.302</b> | <b>24.47 / 0.702 / 0.302</b> |
|       | RED-diff  | -        | 19.41 / 0.367 / 0.658                                  | 19.26 / 0.330 / 0.657        | 22.13 / 0.522 / 0.535        | 21.85 / 0.462 / 0.542        |
|       |           | LLE      | <b>20.85 / 0.484 / 0.602</b>                           | <b>20.89 / 0.491 / 0.578</b> | <b>23.22 / 0.627 / 0.479</b> | <b>23.77 / 0.567 / 0.479</b> |
|       | DiffPIR   | -        | 22.97 / 0.481 / 0.548                                  | 23.53 / 0.552 / 0.421        | 27.53 / 0.672 / 0.386        | 27.14 / 0.663 / 0.345        |
|       |           | LLE      | <b>24.27 / 0.649 / 0.442</b>                           | <b>23.58 / 0.571 / 0.410</b> | <b>29.98 / 0.835 / 0.282</b> | <b>27.44 / 0.695 / 0.327</b> |
|       | ReSample  | -        | 25.35 / 0.699 / 0.381                                  | 21.61 / 0.348 / 0.567        | 29.89 / 0.833 / 0.237        | 23.06 / 0.407 / 0.507        |
|       |           | LLE      | <b>25.59 / 0.719 / 0.378</b>                           | <b>22.30 / 0.392 / 0.550</b> | <b>30.73 / 0.861 / 0.221</b> | <b>24.06 / 0.457 / 0.471</b> |
|       | DAPS      | -        | 25.56 / 0.699 / 0.345                                  | 23.35 / <b>0.453 / 0.447</b> | 29.54 / 0.810 / 0.240        | <b>25.71 / 0.544 / 0.364</b> |
|       |           | LLE      | <b>25.80 / 0.731 / 0.343</b>                           | <b>23.37 / 0.453 / 0.446</b> | <b>30.55 / 0.849 / 0.223</b> | <b>25.71 / 0.547 / 0.357</b> |

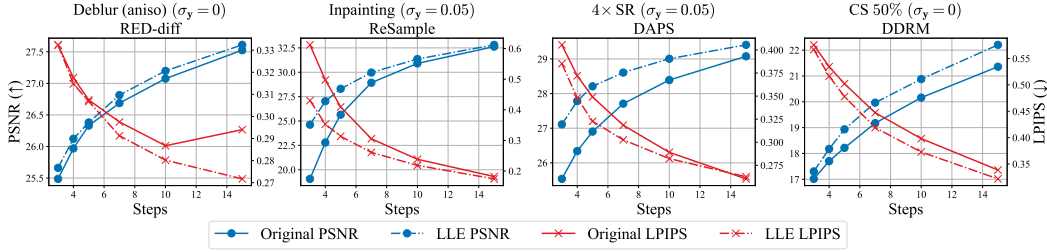

Figure 2: PSNR and LPIPS metrics under various steps for four algorithms on the FFHQ linear inverse problems.

## 237 5.2 Main results

238 Table 1 presents the performance of five algorithms on four noisy linear tasks from the CelebA-HQ  
 239 dataset with 3 and 5 steps. Table 2 shows the results of nonlinear deblurring task on CelebA-HQ and  
 240 FFHQ under both noiseless and noisy settings with 3 and 10 steps. The LLE method consistently  
 241 improves the performance across different tasks and algorithms.

242 Figure 2 illustrates the PSNR and LPIPS metrics for four algorithms on linear tasks from FFHQ  
 243 with steps varying from 3 to 15. LLE consistently achieves superior objective and perceptual metrics  
 244 under different steps. Some qualitative results are provided in Figure 3, and more visualization of the  
 245 results is postponed to Appendix I.

246 A notable observation is that LLE tends to show more significant improvements when the original  
 247 algorithm performs suboptimally, while achieving comparable or slightly better results when the  
 248 original algorithm already performs satisfactorily. This aligns with our expectations since LLE  
 249 searches for better solutions in a linear subspace spanned by previous steps. When an inverse  
 250 algorithm’s trajectory is close to optimal, LLE is expected to approximate this original trajectory.

## 251 5.3 Ablation studies

252 In this section, we present the ablation studies of the decoupled coefficients for linear problems  
 253 and the effect of different  $\omega$  in LLE. We defer more ablation studies and analysis of the results to  
 254 Appendix C, including the visualizations of the learned coefficients, the training and inference time  
 255 of LLE, as well as the cross-dataset and cross-task generalization results.

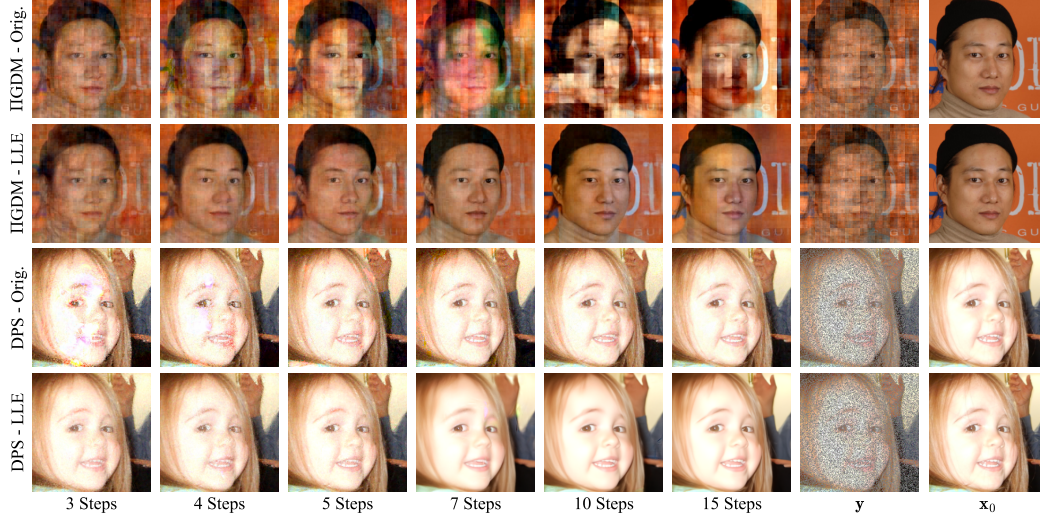

Figure 3: Qualitative comparison of restoration results with and without LLE on the FFHQ dataset. The top two rows present the results of IIGDM on the noiseless compressed sensing task, while the bottom two rows present the results of DPS on the noiseless inpainting task.

#### Decoupled coefficients for linear observations.

Table 3 compares the performance of LLE on linear tasks using decoupled coefficients versus a single set of coefficients. All the algorithm uses LLE and 3 steps. Decoupled coefficients consistently achieve better results, validating the advantage of handling the null-space and range-space components separately.

**Effect of  $\omega$ .** Figure 4 presents the PSNR and LPIPS metrics of the LLE method when varying the hyperparameter  $\omega$  in the range of 0 to 0.5. Both tasks are noiseless and the algorithms use 3 steps. Existing works [11, 13] have observed that objective metrics (PSNR) and perceptual quality (LPIPS) often trade off against each other in certain tasks. Figure 4 indicates that LLE provides a straightforward mechanism to control this balance by adjusting  $\omega$ .

Table 3: Ablation of the decoupled coefficients.

| Algorithm | Task                  | Decoupled    | PSNR $\uparrow$ / SSIM $\uparrow$ / LPIPS $\downarrow$ |
|-----------|-----------------------|--------------|--------------------------------------------------------|
| DiffPIR   | Deblur (aniso)        | $\times$     | 32.81 / 0.887 / 0.194                                  |
|           | ( $\sigma_y = 0$ )    | $\checkmark$ | <b>33.05 / 0.893 / 0.189</b>                           |
| DDNM      | Inpainting            | $\times$     | 20.74 / 0.367 / 0.542                                  |
|           | ( $\sigma_y = 0.05$ ) | $\checkmark$ | <b>22.56 / 0.424 / 0.501</b>                           |
| DDRM      | 4 $\times$ SR         | $\times$     | 25.64 / 0.703 / 0.342                                  |
|           | ( $\sigma_y = 0.05$ ) | $\checkmark$ | <b>25.90 / 0.736 / 0.311</b>                           |
| IIGDM     | CS 50%                | $\times$     | 18.39 / 0.553 / 0.536                                  |
|           | ( $\sigma_y = 0$ )    | $\checkmark$ | <b>18.47 / 0.567 / 0.523</b>                           |

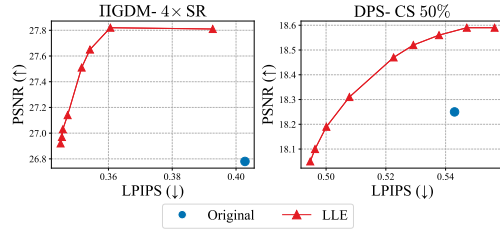

Figure 4: PSNR v.s. LPIPS for varying  $\omega$  in LLE.

## 6 Conclusion

In this paper, we design a unified canonical form for existing diffusion-based inverse algorithms and propose the LLE method to enhance the performance of these algorithms under few steps. Extensive experiments validate the effectiveness of LLE across nine different inverse algorithms and five tasks on two datasets. LLE learns improved solvers for diffusion-based inverse algorithms in a lightweight approach, providing novel insights for the design and acceleration of diffusion-based inverse algorithms in the future.

**Limitations and Future Work.** One limitation of the LLE method is that its search space is confined to the linear subspace spanned by all previous steps. Future work could explore the introduction of nonlinear methods to further improve the algorithm’s performance while maintaining lightweight and universal as LLE. Additionally, the canonical form proposed in this paper offers a flexible framework for combining and designing inverse algorithms. Research could focus on leveraging this framework to design more effective algorithms in the future.

## References

- [1] Jascha Sohl-Dickstein, Eric Weiss, Niru Maheswaranathan, and Surya Ganguli. Deep unsupervised learning using nonequilibrium thermodynamics. In *International conference on machine learning*, pages 2256–2265. PMLR, 2015.
- [2] Jonathan Ho, Ajay Jain, and Pieter Abbeel. Denoising diffusion probabilistic models. *Advances in neural information processing systems*, 33:6840–6851, 2020.
- [3] Jiaming Song, Chenlin Meng, and Stefano Ermon. Denoising diffusion implicit models. In *International Conference on Learning Representations*, 2021.
- [4] Prafulla Dhariwal and Alexander Nichol. Diffusion models beat gans on image synthesis. *Advances in neural information processing systems*, 34:8780–8794, 2021.
- [5] Bahjat Kawar, Michael Elad, Stefano Ermon, and Jiaming Song. Denoising diffusion restoration models. *Advances in Neural Information Processing Systems*, 35:23593–23606, 2022.
- [6] Yinhuai Wang, Jiwen Yu, and Jian Zhang. Zero-shot image restoration using denoising diffusion null-space model. In *The Eleventh International Conference on Learning Representations*, 2023.
- [7] Jiaming Song, Arash Vahdat, Morteza Mardani, and Jan Kautz. Pseudoinverse-guided diffusion models for inverse problems. In *International Conference on Learning Representations*, 2023.
- [8] Hyungjin Chung, Jeongsol Kim, Michael Thompson Mccann, Marc Louis Klasky, and Jong Chul Ye. Diffusion posterior sampling for general noisy inverse problems. In *The Eleventh International Conference on Learning Representations*, 2023.
- [9] Yuanzhi Zhu, Kai Zhang, Jingyun Liang, Jiezhong Cao, Bihan Wen, Radu Timofte, and Luc Van Gool. Denoising diffusion models for plug-and-play image restoration. In *Proceedings of the IEEE/CVF Conference on Computer Vision and Pattern Recognition (CVPR) Workshops*, pages 1219–1229, June 2023.
- [10] Xiangming Meng and Yoshiyuki Kabashima. Diffusion model based posterior sampling for noisy linear inverse problems. In Vu Nguyen and Hsuan-Tien Lin, editors, *Proceedings of the 16th Asian Conference on Machine Learning*, volume 260 of *Proceedings of Machine Learning Research*, pages 623–638. PMLR, 05–08 Dec 2025.
- [11] Morteza Mardani, Jiaming Song, Jan Kautz, and Arash Vahdat. A variational perspective on solving inverse problems with diffusion models. In *The Twelfth International Conference on Learning Representations*, 2024.
- [12] Bowen Song, Soo Min Kwon, Zecheng Zhang, Xinyu Hu, Qing Qu, and Liyue Shen. Solving inverse problems with latent diffusion models via hard data consistency. In *The Twelfth International Conference on Learning Representations*, 2024.
- [13] Jiawei Zhang, Jiaxin Zhuang, Cheng Jin, Gen Li, and Yuantao Gu. Unleashing the denoising capability of diffusion prior for solving inverse problems. In A. Globerson, L. Mackey, D. Belgrave, A. Fan, U. Paquet, J. Tomczak, and C. Zhang, editors, *Advances in Neural Information Processing Systems*, volume 37, pages 47636–47677. Curran Associates, Inc., 2024.
- [14] Bingliang Zhang, Wenda Chu, Julius Berner, Chenlin Meng, Anima Anandkumar, and Yang Song. Improving diffusion inverse problem solving with decoupled noise annealing. *arXiv preprint arXiv:2407.01521*, 2024.
- [15] Marcelo Bertalmio, Guillermo Sapiro, Vincent Caselles, and Coloma Ballester. Image inpainting. In *Proceedings of the 27th annual conference on Computer graphics and interactive techniques*, pages 417–424, 2000.
- [16] Sung Cheol Park, Min Kyu Park, and Moon Gi Kang. Super-resolution image reconstruction: a technical overview. *IEEE signal processing magazine*, 20(3):21–36, 2003.
- [17] Phong Tran, Anh Tuan Tran, Quynh Phung, and Minh Hoai. Explore image deblurring via encoded blur kernel space. In *Proceedings of the IEEE/CVF conference on computer vision and pattern recognition*, pages 11956–11965, 2021.
- [18] Le Wang and Shengmei Zhao. Fast reconstructed and high-quality ghost imaging with fast walsh–hadamard transform. *Photonics Research*, 4(6):240–244, 2016.

- [19] Hyungjin Chung, Byeongsu Sim, and Jong Chul Ye. Come-closer-diffuse-faster: Accelerating conditional diffusion models for inverse problems through stochastic contraction. In *Proceedings of the IEEE/CVF conference on computer vision and pattern recognition*, pages 12413–12422, 2022.
- [20] Gongye Liu, Haoze Sun, Jiayi Li, Fei Yin, and Yujiu Yang. Accelerating diffusion models for inverse problems through shortcut sampling. In *Proceedings of the Thirty-Third International Joint Conference on Artificial Intelligence, IJCAI '24*, 2024.
- [21] Hanyu Chen, Zhixiu Hao, and Liying Xiao. Deep data consistency: a fast and robust diffusion model-based solver for inverse problems. *arXiv preprint arXiv:2405.10748*, 2024.
- [22] Kushagra Pandey, Ruihan Yang, and Stephan Mandt. Fast samplers for inverse problems in iterative refinement models. *Advances in Neural Information Processing Systems*, 37:26872–26914, 2024.
- [23] Cheng Lu, Yuhao Zhou, Fan Bao, Jianfei Chen, Chongxuan Li, and Jun Zhu. Dpm-solver: A fast ode solver for diffusion probabilistic model sampling in around 10 steps. *Advances in Neural Information Processing Systems*, 35:5775–5787, 2022.
- [24] Cheng Lu, Yuhao Zhou, Fan Bao, Jianfei Chen, Chongxuan Li, and Jun Zhu. DPM-solver++: Fast solver for guided sampling of diffusion probabilistic models, 2023.
- [25] Wenliang Zhao, Lujia Bai, Yongming Rao, Jie Zhou, and Jiwen Lu. Unipc: A unified predictor-corrector framework for fast sampling of diffusion models. *Advances in Neural Information Processing Systems*, 36:49842–49869, 2023.
- [26] Kaiwen Zheng, Cheng Lu, Jianfei Chen, and Jun Zhu. Dpm-solver-v3: Improved diffusion ode solver with empirical model statistics. *Advances in Neural Information Processing Systems*, 36:55502–55542, 2023.
- [27] Zhongjie Duan, Chengyu Wang, Cen Chen, Jun Huang, and Weining Qian. Optimal linear subspace search: Learning to construct fast and high-quality schedulers for diffusion models. In *Proceedings of the 32nd ACM International Conference on Information and Knowledge Management*, pages 463–472, 2023.
- [28] Diederik Kingma, Tim Salimans, Ben Poole, and Jonathan Ho. Variational diffusion models. *Advances in neural information processing systems*, 34:21696–21707, 2021.
- [29] Brian DO Anderson. Reverse-time diffusion equation models. *Stochastic Processes and their Applications*, 12(3):313–326, 1982.
- [30] Kacper Chwialkowski, Heiko Strathmann, and Arthur Gretton. A kernel test of goodness of fit. In *International conference on machine learning*, pages 2606–2615. PMLR, 2016.
- [31] Qiang Liu, Jason Lee, and Michael Jordan. A kernelized stein discrepancy for goodness-of-fit tests. In *International conference on machine learning*, pages 276–284. PMLR, 2016.
- [32] Aapo Hyvärinen and Peter Dayan. Estimation of non-normalized statistical models by score matching. *Journal of Machine Learning Research*, 6(4), 2005.
- [33] Pascal Vincent. A connection between score matching and denoising autoencoders. *Neural computation*, 23(7):1661–1674, 2011.
- [34] Yang Song, Conor Durkan, Iain Murray, and Stefano Ermon. Maximum likelihood training of score-based diffusion models. *Advances in neural information processing systems*, 34:1415–1428, 2021.
- [35] Qinsheng Zhang and Yongxin Chen. Fast sampling of diffusion models with exponential integrator. In *The Eleventh International Conference on Learning Representations*, 2023.
- [36] Zhenyu Zhou, Defang Chen, Can Wang, and Chun Chen. Fast ode-based sampling for diffusion models in around 5 steps. In *Proceedings of the IEEE/CVF Conference on Computer Vision and Pattern Recognition*, pages 7777–7786, 2024.
- [37] Shuchen Xue, Mingyang Yi, Weijian Luo, Shifeng Zhang, Jiacheng Sun, Zhenguo Li, and Zhi-Ming Ma. Sa-solver: Stochastic adams solver for fast sampling of diffusion models. *Advances in Neural Information Processing Systems*, 36:77632–77674, 2023.
- [38] Marlis Hochbruck and Alexander Ostermann. Exponential integrators. *Acta Numerica*, 19:209–286, 2010.
- [39] Richard Zhang, Phillip Isola, Alexei A Efros, Eli Shechtman, and Oliver Wang. The unreasonable effectiveness of deep features as a perceptual metric. In *Proceedings of the IEEE conference on computer vision and pattern recognition*, pages 586–595, 2018.

- 386 [40] Aaron Defazio, Xingyu Yang, Ahmed Khaled, Konstantin Mishchenko, Harsh Mehta, and Ashok Cutkosky.  
387 The road less scheduled. *Advances in Neural Information Processing Systems*, 37:9974–10007, 2025.
- 388 [41] Tero Karras, Timo Aila, Samuli Laine, and Jaakko Lehtinen. Progressive growing of gans for improved  
389 quality, stability, and variation. In *International Conference on Learning Representations*, 2018.
- 390 [42] Tero Karras, Samuli Laine, and Timo Aila. A style-based generator architecture for generative adversarial  
391 networks. In *Proceedings of the IEEE/CVF conference on computer vision and pattern recognition*, pages  
392 4401–4410, 2019.
- 393 [43] Andreas Lugmayr, Martin Danelljan, Andres Romero, Fisher Yu, Radu Timofte, and Luc Van Gool.  
394 Repaint: Inpainting using denoising diffusion probabilistic models. In *Proceedings of the IEEE/CVF*  
395 *conference on computer vision and pattern recognition*, pages 11461–11471, 2022.
- 396 [44] Zhou Wang, Alan C Bovik, Hamid R Sheikh, and Eero P Simoncelli. Image quality assessment: from error  
397 visibility to structural similarity. *IEEE transactions on image processing*, 13(4):600–612, 2004.
- 398 [45] Martin Heusel, Hubert Ramsauer, Thomas Unterthiner, Bernhard Nessler, and Sepp Hochreiter. Gans  
399 trained by a two time-scale update rule converge to a local nash equilibrium. *Advances in neural information*  
400 *processing systems*, 30, 2017.
- 401 [46] Yang Song, Jascha Sohl-Dickstein, Diederik P Kingma, Abhishek Kumar, Stefano Ermon, and Ben  
402 Poole. Score-based generative modeling through stochastic differential equations. *arXiv preprint*  
403 *arXiv:2011.13456*, 2020.
- 404 [47] Kendall Atkinson, Weimin Han, and David E Stewart. *Numerical solution of ordinary differential equations*.  
405 John Wiley & Sons, 2009.
- 406 [48] Hengkang Wang, Xu Zhang, Taihui Li, Yuxiang Wan, Tiancong Chen, and Ju Sun. Dmplug: A plug-in  
407 method for solving inverse problems with diffusion models. In A. Globerson, L. Mackey, D. Belgrave,  
408 A. Fan, U. Paquet, J. Tomczak, and C. Zhang, editors, *Advances in Neural Information Processing Systems*,  
409 volume 37, pages 117881–117916. Curran Associates, Inc., 2024.
- 410 [49] Phong Tran, Anh Tuan Tran, Quynh Phung, and Minh Hoai. Explore image deblurring via encoded blur  
411 kernel space. In *Proceedings of the IEEE/CVF conference on computer vision and pattern recognition*,  
412 pages 11956–11965, 2021.



# Appendix

In the appendix, we provide additional discussions and details that are omitted in the main paper due to space limitations. Appendix A reviews existing methods for solving inverse problems with diffusion models under few steps, highlighting how our work is complementary to these approaches and has the potential to be combined with them. Appendix B presents the derivations of the probability flow ode for posterior sampling, the main results shown in the main text, and also the analysis of solvers for inverse algorithms in the SDE form. Appendix C supplements more analysis and ablation studies omitted in the main text due to space constraints. Appendix D elaborates on the detailed decomposition under the proposed canonical form of the nine inverse algorithms adopted in our experiments. Appendix E introduces our tailored design of LLE for DDRM and DDNM on noisy linear problems, which is specifically adapted to better align with both algorithms. Appendix F describes additional experimental details, including inverse problem settings, the hyperparameter configurations of the inverse algorithms, and the optimization methods for LLE training. Appendix G presents the pseudo-code for the training and inference of our LLE method. Appendix H provides comprehensive results across CelebA-HQ and FFHQ datasets using 3, 4, 5, 7, 10, and 15 steps, covering four or five tasks (depending on the algorithm’s ability to handle nonlinear problems) in both noiseless and noisy scenarios. Appendix I presents additional qualitative results.

## A More related works

Recently, several works [19, 20, 21, 22] have attempted to design algorithms capable of solving inverse problems with diffusion models under few steps. We provide a detailed explanation of these methods and describe their differences from this work.

Chung *et al.*[19] point out that it is unnecessary to sample from pure Gaussian noise for solving inverse problems. Instead, starting from a lower noise level is more efficient by initializing with a noised version of the degraded image. Liu *et al.*[20] adopt a similar idea and refines it by using DDIM inversion to obtain the noisy image from the degraded observation as initialization. Both methods can essentially be seen as utilizing only a short segment of the diffusion sampling chain close to the clean image rather than the full sampling chain. In our work, we default to the use of the complete sampling chain for inverse algorithms. The proposed LLE method can also be applied to these methods, which only requires adjusting the sampling interval of timesteps  $t_S, \dots, t_0$  and using the corresponding initialization methods. Moreover, it can be verified that the algorithms in [19] and [20] can both be decomposed into our proposed canonical form.

Chen *et al.*[21] introduce deep data consistency (DDC), which employs an additional UNet to learn the data consistency process. We note that this is equivalent to using a UNet as the Corrector in our canonical form, making LLE directly compatible with DDC. Chen *et al.*[21] also observe that existing methods essentially are equivalent to imposing constraints on  $\mathbf{x}_{0,t}$ . While [21] primarily focuses on the data consistency step, our proposed canonical form systematically modularizes the diffusion model-based inverse algorithms into three components, providing a more comprehensive framework that fits well with our LLE method.

Pandey *et al.*[22] propose enhancing the efficiency of inverse problem solving by integrating the Conjugate Integrators method from diffusion sampling. They design a specialized Conjugate Integrator for IIGDM, named C-IIGDM, which transforms the solving process into a space that is more flexible and more friendly to inverse problems, thereby reducing the solver’s dependency on small step sizes. The solver in C-IIGDM remains first-order, and the concept of LLE can still be applied to introduce higher-order information to further improve its performance under few steps. Additionally, the observation-based correction step in C-IIGDM can also be transformed to process in the original space by using projections between the original and transformed spaces, making it well-suited for our canonical form and LLE method.

In summary, existing few-step diffusion-based inverse algorithms are complementary to the proposed LLE method, and all fit within our canonical form. Combining LLE with these approaches has the potential to further enhance the performance of inverse algorithms under few steps, and we leave the exploration of these combinations for future work.

## B Derivations of the main results

### B.1 Probability flow ODE for posterior sampling

The derivation is similar to the probability flow ODE for diffusion sampling without observation in [46]. Recall the reverse time SDE for posterior sampling

$$d\mathbf{x}_t = (f(t)\mathbf{x}_t - g^2(t)\nabla_{\mathbf{x}_t} \log p(\mathbf{x}_t|\mathbf{y}, t)) dt + g(t)d\bar{\mathbf{w}}_t, \quad \mathbf{x}_T \sim p(\mathbf{x}_T|\mathbf{y}, T), \quad (23)$$

where  $d\bar{\mathbf{w}}_t$  denotes the reverse-time Wiener process. Denote  $\tau = T - t$ , then we can rewrite (23) as

$$d\mathbf{x}_\tau = -(f(\tau)\mathbf{x}_\tau - g^2(\tau)\nabla_{\mathbf{x}_\tau} \log p(\mathbf{x}_\tau|\mathbf{y}, \tau)) d\tau + g(\tau)d\mathbf{w}_\tau. \quad (24)$$

Its corresponding Fokker-Planck equation follows

$$\frac{\partial p(\mathbf{x}|\mathbf{y}, \tau)}{\partial \tau} = \nabla_{\mathbf{x}} \cdot ((f(\tau)\mathbf{x} - g^2(\tau)\nabla_{\mathbf{x}} \log p(\mathbf{x}|\mathbf{y}, \tau)) p(\mathbf{x}|\mathbf{y}, \tau)) + \frac{1}{2} \nabla_{\mathbf{x}} \cdot (g^2(\tau)\nabla_{\mathbf{x}} p(\mathbf{x}|\mathbf{y}, \tau)), \quad (25)$$

with the fact that the marginal distribution of  $\mathbf{x}$  at time  $\tau$  is  $p(\mathbf{x}|\mathbf{y}, \tau)$ . Note that

$$\nabla_{\mathbf{x}} p(\mathbf{x}|\mathbf{y}, \tau) = p(\mathbf{x}|\mathbf{y}, \tau) \nabla_{\mathbf{x}} \log p(\mathbf{x}|\mathbf{y}, \tau). \quad (26)$$

Thus (25) becomes

$$\frac{\partial p(\mathbf{x}|\mathbf{y}, \tau)}{\partial \tau} = \nabla_{\mathbf{x}} \cdot \left( f(\tau)\mathbf{x} - \frac{1}{2}g^2(\tau)\nabla_{\mathbf{x}} \log p(\mathbf{x}|\mathbf{y}, \tau) \right), \quad (27)$$

which is exactly the Liouville equation for reverse-time probability flow ode

$$d\mathbf{x} = \left( f(t)\mathbf{x} - \frac{1}{2}g^2(t)\nabla_{\mathbf{x}} \log p(\mathbf{x}|\mathbf{y}, t) \right) dt. \quad (28)$$

### B.2 Derivations of Proposition 1

By definition, we have

$$\nabla_{\mathbf{x}_t} \log p(\mathbf{x}_t|\mathbf{y}) = \frac{\sqrt{\bar{\alpha}_t}\mathbf{x}_0(t, \mathbf{y}) - \mathbf{x}_t}{1 - \bar{\alpha}_t}. \quad (29)$$

Thus (6) can be rewritten as

$$\frac{d\mathbf{x}_t}{dt} = \left( f(t) + \frac{1}{2(1 - \bar{\alpha}_t)}g^2(t) \right) \mathbf{x}_t - \frac{1}{2}g^2(t) \frac{\sqrt{\bar{\alpha}_t}}{1 - \bar{\alpha}_t} \mathbf{x}_0(t, \mathbf{y}). \quad (30)$$

Given  $\mathbf{x}_{t_{i+1}}$ , the solution to the semilinear ODE (30) is known to be [47]

$$\mathbf{x}_{t_i} = \zeta(t_i, t_{i+1})\mathbf{x}_{t_{i+1}} - \int_{t_{i+1}}^{t_i} \zeta(t_i, \tau) \frac{1}{2}g^2(\tau) \frac{\sqrt{\bar{\alpha}_\tau}}{1 - \bar{\alpha}_\tau} \mathbf{x}_0(\tau, \mathbf{y}) d\tau. \quad (31)$$

where

$$\zeta(t, s) = \exp \left( \int_s^t \left( f(\tau) + \frac{1}{2(1 - \bar{\alpha}_\tau)}g^2(\tau) \right) d\tau \right). \quad (32)$$

Note that

$$\int_s^t \left( f(\tau) + \frac{1}{2(1 - \bar{\alpha}_\tau)}g^2(\tau) \right) d\tau = \int_s^t \frac{1}{2(1 - \bar{\alpha}_\tau)} \frac{d(1 - \bar{\alpha}_\tau)\tau}{d\tau} d\tau = \log \frac{\sqrt{1 - \bar{\alpha}_t}}{\sqrt{1 - \bar{\alpha}_s}}. \quad (33)$$

Thus (31) is

$$\begin{aligned} & \sqrt{\bar{\alpha}_{t_i}}\mathbf{x}_0(t_i, \mathbf{y}) - (1 - \bar{\alpha}_{t_i})\nabla_{\mathbf{x}_{t_i}} \log p(\mathbf{x}_{t_i}|\mathbf{y}) \\ &= \frac{\sqrt{1 - \bar{\alpha}_{t_i}}}{\sqrt{1 - \bar{\alpha}_{t_{i+1}}}} \left( \sqrt{\bar{\alpha}_{t_{i+1}}}\mathbf{x}_0(t_{i+1}, \mathbf{y}) - (1 - \bar{\alpha}_{t_{i+1}})\nabla_{\mathbf{x}_{t_{i+1}}} \log p(\mathbf{x}_{t_{i+1}}|\mathbf{y}) \right) \\ & \quad - \sqrt{1 - \bar{\alpha}_{t_i}} \int_{t_{i+1}}^{t_i} \frac{1}{2}g^2(\tau) \frac{\sqrt{\bar{\alpha}_\tau}}{(1 - \bar{\alpha}_\tau)^{3/2}} \mathbf{x}_0(\tau, \mathbf{y}) d\tau. \end{aligned} \quad (34)$$

Rearrange (34) yields

$$\begin{aligned} \mathbf{x}_0(t_i, \mathbf{y}) &= \frac{\sqrt{1 - \bar{\alpha}_{t_i}}}{\sqrt{\bar{\alpha}_{t_i}}} \left( \sqrt{1 - \bar{\alpha}_{t_i}}\nabla_{\mathbf{x}_{t_i}} \log p(\mathbf{x}_{t_i}|\mathbf{y}) - \sqrt{1 - \bar{\alpha}_{t_{i+1}}}\nabla_{\mathbf{x}_{t_{i+1}}} \log p(\mathbf{x}_{t_{i+1}}|\mathbf{y}) \right) \\ & \quad + \frac{\sqrt{1 - \bar{\alpha}_{t_i}}}{\sqrt{1 - \bar{\alpha}_{t_{i+1}}}} \frac{\sqrt{\bar{\alpha}_{t_{i+1}}}}{\sqrt{\bar{\alpha}_{t_i}}} \mathbf{x}_0(t_{i+1}, \mathbf{y}) - \frac{\sqrt{1 - \bar{\alpha}_{t_i}}}{\sqrt{\bar{\alpha}_{t_i}}} \int_{t_{i+1}}^{t_i} \frac{1}{2}g^2(\tau) \frac{\sqrt{\bar{\alpha}_\tau}}{(1 - \bar{\alpha}_\tau)^{3/2}} \mathbf{x}_0(\tau, \mathbf{y}) d\tau. \end{aligned} \quad (35)$$

### 481 B.3 The case with SDE

482 Empirical evidence has shown that the injection of stochastic noise plays a critical role in the  
 483 effectiveness of diffusion-based inverse algorithms. Accordingly, we extend our discussion to cover  
 484 the SDE-based formulation in this section.

485 Considering the SDE for posterior sampling (23), we may follow [24] to solve the SDE as

$$\mathbf{x}_{t_i} = \xi(t_i, t_{i+1})\mathbf{x}_{t_{i+1}} - \int_{t_{i+1}}^{t_i} \xi(t_i, \tau)g^2(\tau)\frac{\sqrt{\bar{\alpha}_\tau}}{1-\bar{\alpha}_\tau}\mathbf{x}_0(\tau, \mathbf{y})d\tau + \int_{t_{i+1}}^{t_i} \xi(t_i, \tau)g(\tau)d\bar{\mathbf{w}}_\tau, \quad (36)$$

486 where

$$\xi(t_i, \tau) = \exp\left(\int_\tau^{t_i} \left(f(\tau) + \frac{1}{1-\bar{\alpha}_\tau}g^2(\tau)\right)d\tau\right). \quad (37)$$

487 We have

$$\int_\tau^{t_i} \left(f(r) + \frac{1}{1-\bar{\alpha}_r}g^2(r)\right)dr = \int_\tau^{t_i} \left(\frac{1}{1-\bar{\alpha}_r}\frac{d(1-\bar{\alpha}_r)}{dr} - \frac{d\log\sqrt{\bar{\alpha}_r}}{dr}\right)dr \quad (38)$$

$$= \log\left(\frac{1-\bar{\alpha}_{t_i}}{1-\bar{\alpha}_\tau}\frac{\sqrt{\bar{\alpha}_\tau}}{\sqrt{\bar{\alpha}_{t_i}}}\right). \quad (39)$$

488 Then the Itô integral is computed as

$$\int_{t_{i+1}}^{t_i} \xi(t_i, \tau)g(\tau)d\bar{\mathbf{w}}_\tau = \frac{1-\bar{\alpha}_{t_i}}{\sqrt{\bar{\alpha}_{t_i}}}\kappa(t_i, t_{i+1})\boldsymbol{\epsilon}, \quad \boldsymbol{\epsilon} \sim \mathcal{N}(\mathbf{0}, \mathbf{I}), \quad (40)$$

489 where

$$\begin{aligned} \kappa^2(t_i, t_{i+1}) &= \int_{t_{i+1}}^{t_i} \frac{\bar{\alpha}_\tau}{(1-\bar{\alpha}_\tau)^2} (d(1-\bar{\alpha}_\tau) - 2(1-\bar{\alpha}_\tau)d\log\sqrt{\bar{\alpha}_\tau}) \\ &= \int_{t_{i+1}}^{t_i} \left(\frac{1}{(1-\bar{\alpha}_\tau)^2} - \frac{1}{1-\bar{\alpha}_\tau}\right) d(1-\bar{\alpha}_\tau) - \frac{1}{1-\bar{\alpha}_\tau}d\bar{\alpha}_\tau \\ &= \frac{1}{1-\bar{\alpha}_{t_{i+1}}} - \frac{1}{1-\bar{\alpha}_{t_i}}. \end{aligned} \quad (41)$$

490 Thus with (29) one have

$$\begin{aligned} \mathbf{x}_0(t_i, \mathbf{y}) &= \frac{1-\bar{\alpha}_{t_i}}{1-\bar{\alpha}_{t_{i+1}}}\frac{\bar{\alpha}_{t_{i+1}}}{\bar{\alpha}_{t_i}}\mathbf{x}_0(t_{i+1}, \mathbf{y}) \\ &\quad - \frac{1-\bar{\alpha}_{t_i}}{\bar{\alpha}_{t_i}}\int_{t_{i+1}}^{t_i} \eta(\tau)\mathbf{x}_0(\tau, \mathbf{y})d\tau + \underbrace{\frac{1-\bar{\alpha}_{t_i}}{\bar{\alpha}_{t_i}}\sqrt{\frac{1}{1-\bar{\alpha}_{t_{i+1}}} - \frac{1}{1-\bar{\alpha}_{t_i}}}\boldsymbol{\epsilon}}_{\textcircled{1}} \\ &\quad + \underbrace{\frac{1-\bar{\alpha}_{t_i}}{\bar{\alpha}_{t_i}}\left(\sqrt{\bar{\alpha}_{t_i}}\nabla_{\mathbf{x}_{t_i}}\log p(\mathbf{x}_{t_i}|\mathbf{y}) - \sqrt{\bar{\alpha}_{t_{i+1}}}\nabla_{\mathbf{x}_{t_{i+1}}}\log p(\mathbf{x}_{t_{i+1}}|\mathbf{y})\right)}_{\textcircled{2}}, \end{aligned} \quad (42)$$

491 where  $\eta(\tau) = \frac{\bar{\alpha}_\tau}{(1-\bar{\alpha}_\tau)^2}g^2(\tau)$ .

492 Similarly, the integral of  $\mathbf{x}_0(\tau, \mathbf{y})$  may be approximated by the (informal) Taylor expansion, with  
 493 high-order derivatives estimated from previous-step results. An estimate  $\hat{\mathbf{x}}_{t_i}$  can be sampled using a  
 494 standard DDPM update, i.e.,

$$\hat{\mathbf{x}}_{t_i} \sim \mathcal{N}\left(\frac{\sqrt{\bar{\alpha}_{t_i}}}{1-\bar{\alpha}_{t_{i+1}}}\left(1-\frac{\bar{\alpha}_{t_{i+1}}}{\bar{\alpha}_{t_i}}\right)\mathbf{x}_0 + \frac{1-\bar{\alpha}_{t_i}}{1-\bar{\alpha}_{t_{i+1}}}\frac{\sqrt{\bar{\alpha}_{t_{i+1}}}}{\sqrt{\bar{\alpha}_{t_i}}}\mathbf{x}_{t_{i+1}}, \frac{1-\bar{\alpha}_{t_i}}{1-\bar{\alpha}_{t_{i+1}}}\left(1-\frac{\bar{\alpha}_{t_{i+1}}}{\bar{\alpha}_{t_i}}\right)\mathbf{I}\right). \quad (43)$$

495 If the sampled noise is exactly the same  $\boldsymbol{\epsilon}$  in (42), then  $\textcircled{1} + \textcircled{2}$  in (42) is

$$\frac{\bar{\alpha}_{t_i}}{1-\bar{\alpha}_{t_i}}\frac{\hat{\mathbf{x}}_{t_i} + (1-\bar{\alpha}_{t_i})\nabla_{\mathbf{x}_{t_i}}\log p(\mathbf{x}_{t_i}|\mathbf{y})}{\sqrt{\bar{\alpha}_{t_i}}} - \frac{\bar{\alpha}_{t_i}}{1-\bar{\alpha}_{t_{i+1}}}\mathbf{x}_0(t_{i+1}, \mathbf{y}), \quad (44)$$

496 which leads to a similar conclusion as Corollary 2.

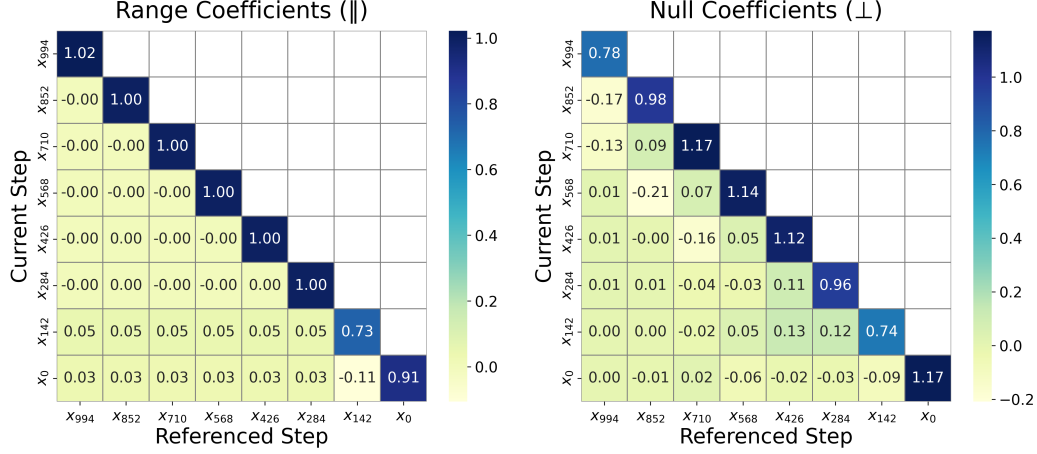

Figure 5: Visualization of learned coefficients of DDNM on the noisy inpainting task.

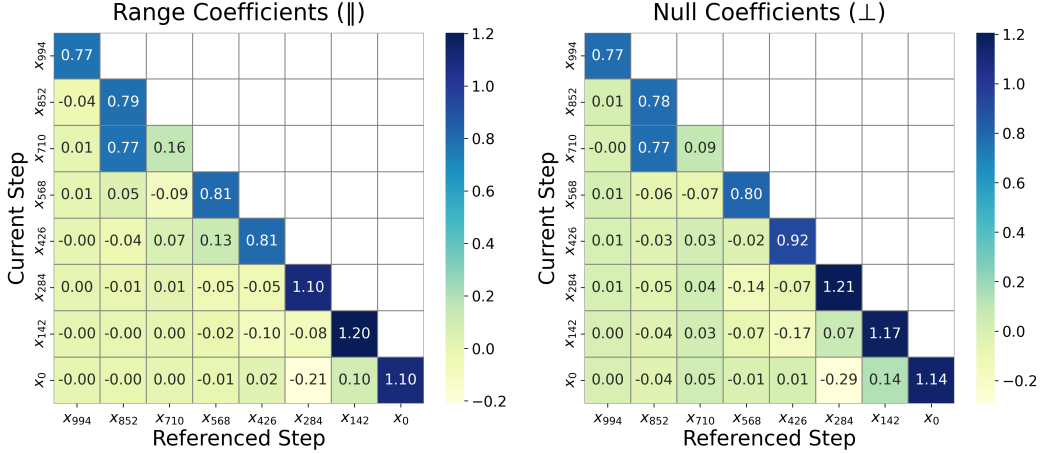

Figure 6: Visualization of learned coefficients of IIGDM on the noisy compressive sensing task.

## C More ablation studies and additional analysis

In this section, we supplement the ablation studies and discussion that are omitted in the main text due to space constraints.

### C.1 Visualization of the LLE coefficients

Here, we present and analyze the visualization of the learned coefficients from several algorithms trained on the CelebA-HQ dataset. Figure 5, Figure 6, Figure 7, and Figure 8 correspond to DDNM on noisy inpainting, IIGDM on noisy compressive sensing, DPS on noiseless super-resolution, and DiffPIR on noiseless anisotropic deblurring, respectively. All visualizations are based on 7-step inference. The vertical axis indicates the current step in the inverse process, and each row represents the linear combination weights applied to all previous steps. The left subfigure shows the coefficients for range space, while the right subfigure shows the coefficients for null space.

Different algorithms yield distinct patterns of the learned linear combination coefficients, which is attributed to their underlying different architectures and designs. At the same time, several shared characteristics emerge across methods, aligning well with the design philosophy of our framework.

First, we observe a clear difference between the range space and null space coefficients. This supports our hypothesis that learning separate coefficients allows the algorithm to better capture the varying strengths of the observation constraints in the range and null spaces. Notably in DDNM, the range space coefficients are almost entirely concentrated along the diagonal with values close to one, while

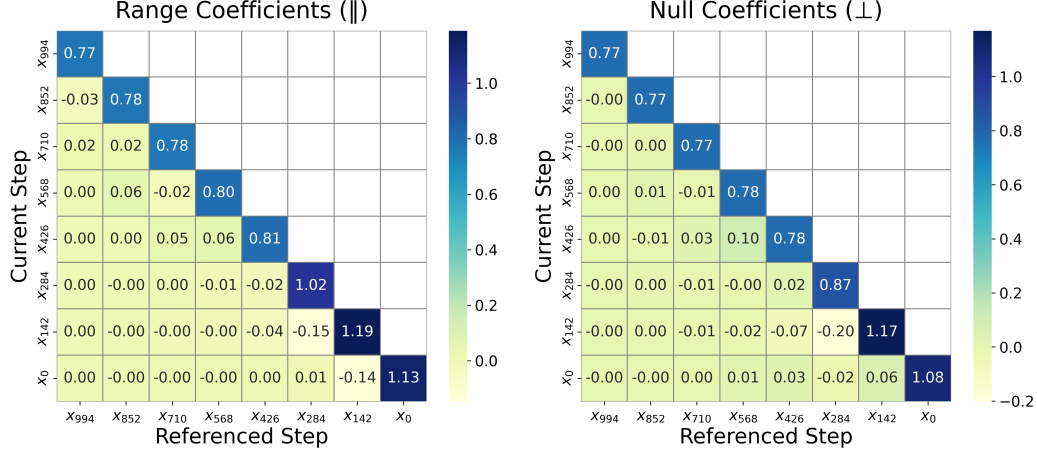

Figure 7: Visualization of learned coefficients of DPS on the noiseless super-resolution task.

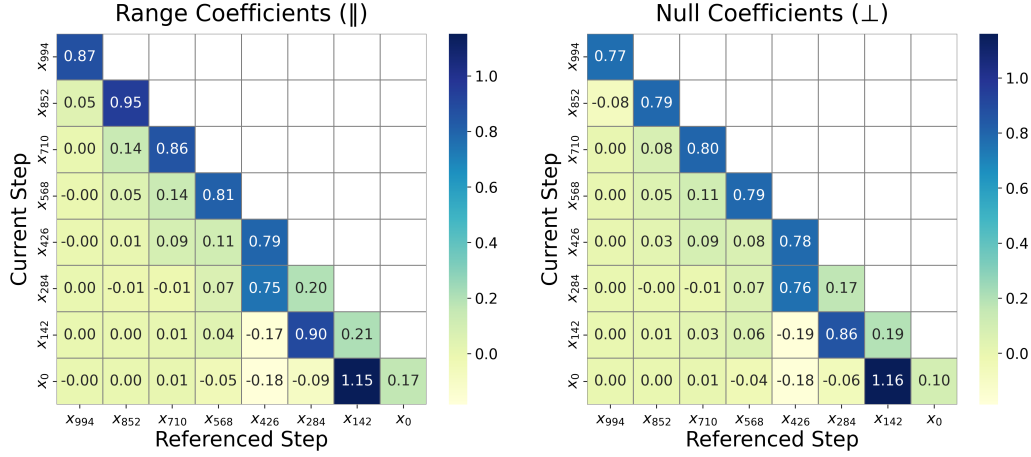

Figure 8: Visualization of learned coefficients of DiffPIR on the noiseless anisotropic deblurring task.

off-diagonal elements remain near zero. This is consistent with the design philosophy of DDNM: DDNM’s correction step explicitly projects the sample onto the hyperplane defined by the observation, thereby enforcing a hard constraint in the range space while preserving greater flexibility in the null space. Some non-zero off-diagonal coefficients in the range space are attributed to the observation noise. The other three methods do not employ explicit projection operations. Consequently, these methods impose relatively less stringent constraints on the range space compared to DDNM, which may result in estimation discrepancies that LLE could compensate for by learning a more effective linear combination.

Second, we observe that the learned coefficients are not always dominated by diagonal elements. For instance, in IIGDM at step 770 and in DiffPIR at steps 142 and 0, the model assigns larger weights to earlier steps rather than the current one. This suggests that LLE may, in certain cases, favor earlier estimates over the most recent one. Such behavior reveals an implicit form of regularization, akin to “early stopping”, within the dynamics of LLE, echoing a similar strategy reported in prior studies [48]. This demonstrates LLE’s ability to dynamically assess the reliability of predictions and turn to past estimates when appropriate, thereby enhancing robustness.

Moreover, a consistent pattern across different inverse algorithms is that the LLE coefficients tend to concentrate around the diagonal and its immediate neighborhood. This suggests that more recent steps exert a stronger influence, while earlier steps contribute less as their estimates become increasingly outdated. Such behavior is intuitive, since earlier predictions are typically less accurate and thus less informative for refining later outputs. Building on this insight, one possible improvement is to introduce a limited look-back window for LLE, which could reduce both computational and memory

Table 4: Cross-dataset generalization results of LLE on the noiseless tasks. *Testset* denotes the dataset used for inference, while *Trainset* indicates the dataset used to train the LLE coefficients. We also include results without LLE for comparison, denoted by “-” in the *Trainset* column.

| Testset   | Trainset  | PSNR↑ / SSIM↑ / LPIPS↓       |                              |                              |                              |
|-----------|-----------|------------------------------|------------------------------|------------------------------|------------------------------|
|           |           | Deblur (aniso)               | Inpainting                   | 4× SR                        | CS 50%                       |
| CelebA-HQ | -         | 39.99 / 0.962 / 0.090        | 27.83 / 0.758 / 0.332        | <b>30.97 / 0.877 / 0.188</b> | 18.98 / 0.619 / 0.450        |
|           | CelebA-HQ | 40.20 / 0.964 / 0.087        | <b>30.93 / 0.887 / 0.221</b> | 30.90 / 0.874 / <b>0.182</b> | <b>20.15 / 0.640 / 0.415</b> |
|           | FFHQ      | <b>40.28 / 0.965 / 0.086</b> | 30.70 / 0.883 / 0.226        | 30.89 / 0.874 / <b>0.182</b> | 20.13 / <b>0.643 / 0.413</b> |
| FFHQ      | -         | 39.82 / 0.964 / 0.087        | 26.34 / 0.719 / 0.380        | <b>29.99 / 0.865 / 0.210</b> | 18.29 / 0.591 / 0.488        |
|           | FFHQ      | <b>40.08 / 0.966 / 0.084</b> | 28.71 / <b>0.838 / 0.292</b> | 29.94 / 0.863 / <b>0.206</b> | <b>19.21 / 0.605 / 0.463</b> |
|           | CelebA-HQ | 40.00 / 0.965 / 0.085        | <b>28.84 / 0.838 / 0.292</b> | 29.92 / 0.863 / <b>0.206</b> | 19.19 / 0.599 / 0.466        |

Table 5: Cross-task generalization results of LLE on noiseless tasks from FFHQ. *Train task* denotes the task used to train the LLE coefficients. We also include results without LLE for comparison, indicated by “-” in the *Train task* column.

| Train task | PSNR↑ / SSIM↑ / LPIPS↓       |                              |                              |                              |
|------------|------------------------------|------------------------------|------------------------------|------------------------------|
|            | Deblur (aniso)               | Inpainting                   | 4× SR                        | CS 50%                       |
| Deblur     | <b>40.08 / 0.966 / 0.084</b> | 24.53 / 0.655 / 0.432        | 29.90 / 0.862 / 0.231        | 18.06 / 0.578 / 0.509        |
| Inpainting | 39.04 / 0.960 / 0.094        | <b>28.71 / 0.838 / 0.292</b> | 29.56 / 0.854 / 0.217        | 19.07 / 0.602 / 0.467        |
| 4× SR      | 39.32 / 0.959 / 0.095        | 27.70 / 0.774 / 0.339        | 29.94 / 0.863 / <b>0.206</b> | 18.73 / 0.602 / 0.475        |
| CS 50%     | 38.89 / 0.957 / 0.098        | 27.90 / 0.799 / 0.324        | 29.46 / 0.854 / 0.213        | <b>19.21 / 0.605 / 0.463</b> |
| -          | 39.82 / 0.964 / 0.087        | 26.34 / 0.719 / 0.380        | <b>29.99 / 0.865 / 0.210</b> | 18.29 / 0.591 / 0.488        |

overhead during training and inference. This modification may further improve the scalability of LLE, particularly in inverse problems involving longer sampling trajectories. We leave a deeper investigation to future work.

## C.2 Cross-task and cross-dataset generalization

Although conceptually LLE requires training with the same prior distribution and inverse task as inference, we also evaluate its generalizability across datasets and tasks. Table 4 reports LLE’s performance with cross-dataset training, while Table 5 presents performance with corss-task training.

We observe that LLE trained on one dataset generalizes well to another, i.e., training on CelebA-HQ and testing on FFHQ, or vice versa. Cross-dataset training achieves comparable performance to training on the matching dataset, and occasionally even surpasses it. This indicates that LLE possesses a certain degree of cross-dataset generalization capability.

When the training and testing tasks differ, LLE performance generally degrades. However, in some cases, the cross-task trained LLE coefficients still outperform the original baseline without LLE. For instance, LLE trained on super-resolution or compressive sensing can improve performance on inpainting. This suggests that certain inverse problems may share similar underlying structures, potentially leading to similar optimal coefficient patterns. Future work could further explore these shared structures to enhance LLE’s generalization across tasks.

## C.3 Sensitivity to the hyperparameters of original algorithms

It is well known that some inverse algorithms require careful tuning of hyperparameters for each task and dataset, for example, the step size  $\zeta$  in DPS and the regularization weight  $\lambda$  in RED-diff. Small perturbations in these hyperparameters can often lead to significant performance degradation.

We note that the linear combination mechanism in LLE can be interpreted as equivalently involving a learnable scaling factor, which may reduce the sensitivity of the original algorithm to its hyperparameters. We conduct an experiment analyzing the performance of DPS and RED-diff with and without LLE under varying hyperparameter settings on the noiseless compressed sensing task from FFHQ, with hyperparameter  $\zeta$  or  $\lambda$  ranging from 0.2 to 0.8. The performance is shown in Figure 9. The

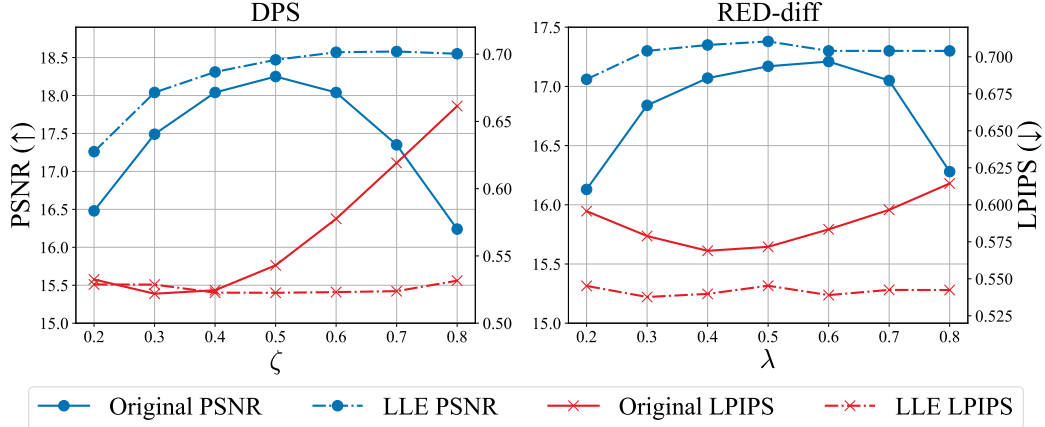

Figure 9: PSNR and LPIPS for varying  $\zeta$  in DPS and  $\lambda$  in RED-diff on noiseless compressed sensing task on FFHQ using 3 steps.

Table 6: Training time (minutes) of LLE for noiseless inpainting task on CelebA-HQ under different steps. Experiments are performed on a single NVIDIA RTX 3090 GPU.

| Algorithm | 3 Steps | 4 Steps | 5 Steps | 7 Steps | 10 Steps | 15 Steps |
|-----------|---------|---------|---------|---------|----------|----------|
| DDNM      | 2.0     | 2.7     | 3.4     | 5.4     | 6.7      | 10.9     |
| DPS       | 2.2     | 2.9     | 3.6     | 5.8     | 7.3      | 11.8     |
| DiffPIR   | 2.2     | 2.9     | 3.7     | 5.9     | 7.3      | 11.9     |
| DAPS      | 2.6     | 3.7     | 4.7     | 7.1     | 8.6      | 14.3     |

results demonstrate that LLE mitigates the influence of hyperparameter variations and consistently achieves better performance, indicating that LLE can potentially reduce the reliance on precise hyperparameter tuning.

#### C.4 Training cost and inference time

Table 6 presents the training time of LLE for DDNM, DPS, DiffPIR, and DAPS on noiseless inpainting tasks from CelebA-HQ. LLE requires only 2 to 20 minutes for training, depending on the task, the complexity of the original algorithm, and the number of steps. This demonstrates the lightweight advantage of our LLE method.

We also compare the inference time of each algorithm with and without the LLE module. Table 7 presents the inference time on the CelebA-HQ 1k test set for the inpainting task. The results indicates that incorporating LLE introduces negligible additional computational overhead during inference. The efficiency of LLE stems from the simplicity of its operation, which only involves computing a linear combination of previous samples without introducing any complex transformations.

#### C.5 Analysis with default steps

Though our primary focus is on performance under limited steps, we also present the 100-step results of DDNM on CelebA-HQ in Table 8 as a reference. These results further indicate that LLE is particularly effective when there is a large performance gap between the few-step setting and the optimal setting. For example, in the inpainting and compressive sensing tasks, the difference between the few-step performance and the default-step (100 steps) performance is substantial, thus LLE provides significant improvements, with PSNR gains ranging from 1dB to 8dB. In contrast, for deblurring and super-resolution tasks, the performance gap between few steps and 100 steps is relatively limited, and correspondingly, LLE yields smaller improvements. This is expected as LLE is constrained to searching within the linear combinations of previous predictions; thus, when the few-step trajectory already approximates the optimal performance, LLE tends to learn a trajectory similar to the original one.

Table 7: Inference time (minutes) of LLE for noiseless inpainting task on the 1k test set of CelebA-HQ. Experiments are performed on a single NVIDIA RTX 3090 GPU.

| Algorithm | Strategy | 3 Steps | 4 Steps | 5 Steps | 7 Steps | 10 Steps | 15 Steps |
|-----------|----------|---------|---------|---------|---------|----------|----------|
| DDNM      | -        | 2.0     | 2.66    | 3.3     | 5.24    | 6.57     | 10.47    |
|           | LLE      | 2.0     | 2.66    | 3.34    | 5.35    | 6.68     | 10.74    |
| DPS       | -        | 5.07    | 6.76    | 8.48    | 13.46   | 16.75    | 26.92    |
|           | LLE      | 5.13    | 6.84    | 8.49    | 13.61   | 16.96    | 27.21    |
| DiffPIR   | -        | 5.18    | 7.14    | 8.66    | 14.27   | 17.54    | 28.18    |
|           | LLE      | 5.45    | 7.14    | 8.76    | 14.35   | 17.79    | 28.31    |
| DAPS      | -        | 13.2    | 17.29   | 20.57   | 36.7    | 43.58    | 73.36    |
|           | LLE      | 13.3    | 17.53   | 21.14   | 36.88   | 43.66    | 76.02    |

Table 8: Comparison of DDNM with few-steps and default steps on CelebA-HQ Dataset.

| Condition         | Steps | Strategy | PSNR↑ / SSIM↑ / LPIPS↓                     |                                            |                                     |                                            |
|-------------------|-------|----------|--------------------------------------------|--------------------------------------------|-------------------------------------|--------------------------------------------|
|                   |       |          | Deblur (aniso)                             | Inpainting                                 | 4× SR                               | CS 50%                                     |
| $\sigma_y = 0.05$ | 3     | -        | 27.80 / 0.758 / 0.319                      | 16.64 / 0.442 / 0.492                      | 27.09 / <b>0.773</b> / <b>0.296</b> | 16.55 / 0.442 / 0.539                      |
|                   |       | LLE      | <b>28.08</b> / <b>0.784</b> / <b>0.291</b> | <b>24.38</b> / <b>0.552</b> / <b>0.433</b> | <b>27.84</b> / 0.770 / 0.299        | <b>17.29</b> / <b>0.473</b> / <b>0.520</b> |
|                   | 4     | -        | 28.98 / 0.795 / 0.285                      | 20.27 / 0.510 / 0.457                      | 28.35 / <b>0.803</b> / 0.276        | 17.39 / 0.446 / 0.518                      |
|                   |       | LLE      | <b>29.27</b> / <b>0.817</b> / <b>0.256</b> | <b>25.29</b> / <b>0.592</b> / <b>0.407</b> | <b>28.65</b> / 0.792 / <b>0.270</b> | <b>18.43</b> / <b>0.499</b> / <b>0.474</b> |
|                   | 5     | -        | 29.63 / 0.819 / 0.259                      | 22.76 / 0.550 / 0.431                      | 28.97 / <b>0.818</b> / 0.262        | 18.20 / 0.474 / 0.491                      |
|                   |       | LLE      | <b>29.82</b> / <b>0.831</b> / <b>0.239</b> | <b>26.35</b> / <b>0.659</b> / <b>0.366</b> | <b>29.02</b> / 0.806 / <b>0.252</b> | <b>19.41</b> / <b>0.536</b> / <b>0.441</b> |
|                   | 7     | -        | 30.19 / 0.838 / 0.238                      | 25.93 / 0.627 / 0.388                      | <b>29.52</b> / <b>0.833</b> / 0.242 | 20.28 / 0.554 / 0.434                      |
|                   |       | LLE      | <b>30.29</b> / <b>0.841</b> / <b>0.225</b> | <b>27.69</b> / <b>0.719</b> / <b>0.328</b> | 29.33 / 0.818 / <b>0.233</b>        | <b>21.32</b> / <b>0.608</b> / <b>0.385</b> |
|                   | 10    | -        | 30.45 / 0.845 / 0.227                      | 28.19 / 0.716 / 0.333                      | 29.07 / <b>0.821</b> / 0.241        | 21.30 / 0.636 / 0.379                      |
|                   |       | LLE      | <b>30.50</b> / <b>0.845</b> / <b>0.214</b> | <b>29.13</b> / <b>0.789</b> / <b>0.279</b> | <b>29.08</b> / 0.808 / <b>0.235</b> | <b>22.42</b> / <b>0.674</b> / <b>0.341</b> |
|                   | 15    | -        | 30.50 / 0.846 / 0.217                      | 30.57 / 0.821 / 0.259                      | <b>29.39</b> / <b>0.829</b> / 0.227 | 23.39 / 0.748 / 0.296                      |
|                   |       | LLE      | <b>30.52</b> / <b>0.846</b> / <b>0.206</b> | <b>30.74</b> / <b>0.854</b> / <b>0.228</b> | 29.17 / 0.812 / <b>0.227</b>        | <b>24.04</b> / <b>0.769</b> / <b>0.271</b> |
|                   | 100   | -        | 29.69 / 0.829 / 0.203                      | 33.06 / 0.904 / 0.171                      | 29.21 / 0.823 / 0.219               | 30.42 / 0.882 / 0.183                      |

## D Detailed decomposition of nine inverse algorithms

Here, we present the specific forms of DDRM [5], DDNM [6], DPS [8], IIGDM [7], RED-diff [11], DiffPIR [9], DMPS [10], ReSample [12], and DAPS [14] within the canonical form proposed in this paper. For DDNM, DDRM, DMPS, and IIGDM, we consider linear observations,

$$\mathbf{y} = \mathbf{A}\mathbf{x}_0 + \sigma_y \mathbf{n}, \quad \mathbf{n} \sim \mathcal{N}(\mathbf{0}, \mathbf{I}). \quad (45)$$

For the other algorithms, we consider general observations

$$\mathbf{y} = \mathcal{A}(\mathbf{x}_0) + \sigma_y \mathbf{n}, \quad \mathbf{n} \sim \mathcal{N}(\mathbf{0}, \mathbf{I}). \quad (46)$$

### D.1 DDRM

The Sampler of DDRM is a single-step DDIM, i.e., tweedie’s formula, which is

$$\Phi_{t_i, \text{DDRM}}(\mathbf{x}_{t_i}) = \frac{\mathbf{x}_{t_i} - \sqrt{1 - \bar{\alpha}_{t_i}} \epsilon_{\theta}(\mathbf{x}_{t_i}, t_i)}{\sqrt{\bar{\alpha}_{t_i}}}. \quad (47)$$

Consider  $\mathbf{A}$  as a diagonal matrix and  $s_k$  as the  $k$ -th singular value. A general matrix  $\mathbf{A}$  can be equivalently transformed into a diagonal matrix using Singular Value Decomposition. The correction process is defined element-wise as

$$\mathbf{h}_{t_i, \text{DDRM}}^k(\mathbf{x}_{0, t_i}, \mathbf{A}, \mathbf{y}) = \begin{cases} \mathbf{x}_{0, t_i}^k, & s_k = 0, \\ \mathbf{x}_{0, t_i}^k + \sqrt{1 - \eta^2} \frac{\sqrt{1 - \bar{\alpha}_{t_{i-1}}}}{\sqrt{\bar{\alpha}_{t_{i-1}}}} \frac{\mathbf{y}^k - \mathbf{x}_{0, t_i}^k}{\sigma_y / s_k}, & \sqrt{1 - \bar{\alpha}_{t_{i-1}}} \leq \frac{\sqrt{\bar{\alpha}_{t_{i-1}}} \sigma_y}{s_k}, \\ (1 - \eta_b) \mathbf{x}_{0, t_i}^k + \eta_b \mathbf{y}^k, & \sqrt{1 - \bar{\alpha}_{t_{i-1}}} \geq \frac{\sqrt{\bar{\alpha}_{t_{i-1}}} \sigma_y}{s_k}. \end{cases} \quad (48)$$



597 The Noiser combines noise addition which is similar to DDIM sampling:

$$\Psi_{t_i, \text{DDRM}}^k(\hat{\mathbf{x}}_{0,t_i}) = \begin{cases} \sqrt{\bar{\alpha}_{t_{i-1}}} \hat{\mathbf{x}}_{0,t_i}^k + \sqrt{1 - \eta^2} \sqrt{1 - \bar{\alpha}_{t_{i-1}}} \boldsymbol{\epsilon}_{\theta}^k(\mathbf{x}_{t_i}, t_i) + \eta \sqrt{1 - \bar{\alpha}_{t_{i-1}}} \boldsymbol{\epsilon}^k, & s_k = 0, \\ \sqrt{\bar{\alpha}_{t_{i-1}}} \hat{\mathbf{x}}_{0,t_i}^k + \eta \sqrt{1 - \bar{\alpha}_{t_{i-1}}} \boldsymbol{\epsilon}^k, & \sqrt{1 - \bar{\alpha}_{t_{i-1}}} < \frac{\sqrt{\bar{\alpha}_{t_{i-1}}} \sigma_{\mathbf{y}}}{s_k}, \\ \sqrt{\bar{\alpha}_{t_{i-1}}} \hat{\mathbf{x}}_{0,t_i}^k + \sqrt{1 - \bar{\alpha}_{t_{i-1}} - \frac{\bar{\alpha}_{t_{i-1}} \sigma_{\mathbf{y}}^2}{s_k^2}} \eta_b^2 \boldsymbol{\epsilon}^k, & \sqrt{1 - \bar{\alpha}_{t_{i-1}}} \geq \frac{\sqrt{\bar{\alpha}_{t_{i-1}}} \sigma_{\mathbf{y}}}{s_k}, \end{cases} \quad (49)$$

598 where  $\boldsymbol{\epsilon} \sim \mathcal{N}(\mathbf{0}, \mathbf{I})$ ,  $\eta$  and  $\eta_b$  are hyperparameters.  $\mathbf{x}^k$  denotes the  $k$ -th element of the vector  $\mathbf{x}$ , and  
599 the same notation applies to other vectors.

## 600 D.2 DDNM

601 DDNM is similar to DDRM, where the Sampler is the single-step DDIM as (47). Considering  $\mathbf{A}$  as a  
602 diagonal matrix, the Corrector is a modified projection operator as

$$\mathbf{h}_{t_i, \text{DDNM}}(\mathbf{x}_{0,t_i}, \mathbf{A}, \mathbf{y}) = \mathbf{x}_{0,t_i} + \boldsymbol{\Sigma}_{t_i} \mathbf{A}^\dagger (\mathbf{y} - \mathbf{A} \mathbf{x}_{0,t_i}), \quad (50)$$

603 where  $\boldsymbol{\Sigma}_{t_i} = \text{diag}\{\lambda_1, \dots, \lambda_n\}$  is a diagonal matrix with elements defined as

$$\lambda_k = \begin{cases} 1, & \sigma_{t_{i-1}} \geq \frac{\sqrt{\bar{\alpha}_{t_{i-1}}} \sigma_{\mathbf{y}}}{s_k}, \\ \frac{s_k \sigma_{t_{i-1}} \sqrt{1 - \eta^2}}{\sqrt{\bar{\alpha}_{t_{i-1}}} \sigma_{\mathbf{y}}}, & \sigma_{t_{i-1}} < \frac{\sqrt{\bar{\alpha}_{t_{i-1}}} \sigma_{\mathbf{y}}}{s_k}, \\ 1, & s_k = 0. \end{cases} \quad (51)$$

604 The Noiser is defined element-wise as

$$\Psi_{t_i, \text{DDNM}}^k(\hat{\mathbf{x}}_{0,t_i}) = \begin{cases} \sqrt{\bar{\alpha}_{t_{i-1}}} \hat{\mathbf{x}}_{0,t_i}^k + \sqrt{1 - \eta^2} \sigma_{t_{i-1}} \boldsymbol{\epsilon}_{\theta}^k(\mathbf{x}_{t_i}, t_i) + \eta \sigma_{t_{i-1}} \boldsymbol{\epsilon}^k, & s_k = 0, \\ \sqrt{\bar{\alpha}_{t_{i-1}}} \hat{\mathbf{x}}_{0,t_i}^k + \eta \sigma_{t_{i-1}} \boldsymbol{\epsilon}^k, & \sigma_{t_{i-1}} < \frac{\sqrt{\bar{\alpha}_{t_{i-1}}} \sigma_{\mathbf{y}}}{s_k}, \\ \sqrt{\bar{\alpha}_{t_{i-1}}} \hat{\mathbf{x}}_{0,t_i}^k + \sqrt{\sigma_{t_{i-1}}^2 - \frac{\sigma_{\mathbf{y}}^2 \bar{\alpha}_{t_{i-1}}}{s_k^2}} \boldsymbol{\epsilon}^k, & \sigma_{t_{i-1}} \geq \frac{\sqrt{\bar{\alpha}_{t_{i-1}}} \sigma_{\mathbf{y}}}{s_k}, \end{cases} \quad (52)$$

605 where  $\boldsymbol{\epsilon} \sim \mathcal{N}(\mathbf{0}, \mathbf{I})$  and  $\sigma_{t_i} = \sqrt{1 - \bar{\alpha}_{t_i}}$ .

## 606 D.3 DPS

607 We rewrite the update formula of DPS as

$$\mathbf{x}_{t_{i-1}} = \sqrt{\bar{\alpha}_{t_{i-1}}} \left( \mathbf{x}_{0,t_i} - \zeta_{t_i} / \sqrt{\bar{\alpha}_{t_{i-1}}} \nabla_{\mathbf{x}_{t_i}} \|\mathbf{y} - \mathcal{A}(\mathbf{x}_{0,t_i})\|^2 \right) + c_1 \boldsymbol{\epsilon} + c_2 \boldsymbol{\epsilon}_{\theta}(\mathbf{x}_{t_i}, t_i), \quad (53)$$

608 where  $\mathbf{x}_{0,t_i}$  is the estimation using Tweedie's formula as (47). Thus the Sampler of DPS is a  
609 single-step DDIM. The Corrector is

$$\mathbf{h}_{t_i, \text{DPS}}(\mathbf{x}_{0,t_i}, \mathbf{A}, \mathbf{y}) = \mathbf{x}_{0,t_i} - \frac{1}{\sqrt{\bar{\alpha}_{t_{i-1}}}} \zeta_{t_i} \nabla_{\mathbf{x}_{t_i}} \|\mathbf{y} - \mathcal{A}(\mathbf{x}_{0,t_i})\|^2, \quad (54)$$

610 where  $\zeta_{t_i}$  is the learning rate hyperparameter. The Noiser is exactly the same as DDIM sampling

$$\Psi_{t_i, \text{DPS}}(\hat{\mathbf{x}}_{0,t_i}) = \sqrt{\bar{\alpha}_{t_{i-1}}} \hat{\mathbf{x}}_{0,t_i} + c_1 \boldsymbol{\epsilon} + c_2 \boldsymbol{\epsilon}_{\theta}(\mathbf{x}_{t_i}, t_i), \quad (55)$$

611 where

$$\begin{aligned} c_1 &= \eta \sqrt{1 - \frac{\bar{\alpha}_{t_i}}{\bar{\alpha}_{t_{i-1}}}} \sqrt{\frac{1 - \bar{\alpha}_{t_{i-1}}}{1 - \bar{\alpha}_{t_i}}}, \\ c_2 &= \sqrt{1 - \bar{\alpha}_{t_{i-1}} - c_1^2}, \end{aligned} \quad (56)$$

612 with  $\eta$  as a hyperparameter and  $\boldsymbol{\epsilon} \sim \mathcal{N}(\mathbf{0}, \mathbf{I})$ . Similar transformation is applicable to all posterior  
613 sampling approaches, including IIGDM and DMPS. The derivation is omitted hereafter.

#### 614 D.4 IIGDM

615 The Sampler of IIGDM is a single-step DDIM as (47). The Corrector is

$$\mathbf{h}_{t_i, \text{IIGDM}}(\mathbf{x}_{0,t_i}, \mathbf{A}, \mathbf{y}) = \mathbf{x}_{0,t_i} + \sqrt{\bar{\alpha}_{t_i}/\bar{\alpha}_{t_{i-1}}} \left( (\mathbf{y} - \mathbf{A}\mathbf{x}_{0,t_i})^T \left( \mathbf{A}\mathbf{A}^T + \frac{\sigma_{\mathbf{y}}^2}{r_{t_i}^2} \mathbf{I} \right)^{-1} \mathbf{A} \frac{\partial \mathbf{x}_{0,t_i}}{\partial \mathbf{x}_{t_i}} \right)^T, \quad (57)$$

616 where  $r_{t_i} = \sqrt{1 - \bar{\alpha}_{t_i}}$ . The Noiser is the same as DDIM sampling as (55).

#### 617 D.5 RED-diff

618 The Sampler of RED-diff is a single-step DDIM as (47). RED-diff differs from other algorithms  
619 in that it uses an optimization process to update  $\hat{\mathbf{x}}_{0,t_i}$ . Here we consider only the gradient descent  
620 update, where the Corrector of RED-diff is equivalently given by

$$\mathbf{h}_{t_i, \text{RED-diff}}(\mathbf{x}_{0,t_i}, \mathcal{A}, \mathbf{y}) = \hat{\mathbf{x}}_{0,t_{i+1}} + \xi \left( \mathbf{x}_{0,t_i} - \hat{\mathbf{x}}_{0,t_{i+1}} - \lambda \nabla_{\hat{\mathbf{x}}_{0,t_{i+1}}} \|\mathbf{y} - \mathcal{A}(\hat{\mathbf{x}}_{0,t_{i+1}})\|^2 \right), \quad (58)$$

621 where  $\xi$  is the learning rate, and  $\lambda$  controls the trade-off between the prior and likelihood terms.  
622 However, this formulation fails to reconstruct reasonable results under few steps in our experiments.  
623 We find the issue lies in the likelihood term, so we adjust it as follows to improve its performance  
624 under few steps

$$\mathbf{h}_{t_i, \text{RED-diff}}(\mathbf{x}_{0,t_i}, \mathcal{A}, \mathbf{y}) = \hat{\mathbf{x}}_{0,t_{i+1}} + \xi \left( \mathbf{x}_{0,t_i} - \hat{\mathbf{x}}_{0,t_{i+1}} - \lambda \nabla_{\mathbf{x}_{0,t_i}} \|\mathbf{y} - \mathcal{A}(\mathbf{x}_{0,t_i})\|^2 \right), \quad (59)$$

625 where we use the  $\mathbf{x}_{0,t_i}$  to calculate the loss for the likelihood term rather than  $\hat{\mathbf{x}}_{0,t_{i+1}}$ . The Noiser of  
626 RED-diff is directly noise addition as

$$\Psi_{t_i, \text{RED-diff}}(\hat{\mathbf{x}}_{0,t_i}) = \sqrt{\bar{\alpha}_{t_{i-1}}} \hat{\mathbf{x}}_{0,t_i} + \sqrt{1 - \bar{\alpha}_{t_{i-1}}} \epsilon, \quad \epsilon \sim \mathcal{N}(\mathbf{0}, \mathbf{I}). \quad (60)$$

#### 627 D.6 DiffPIR

628 The Sampler of DiffPIR is a single-step DDIM as (47). The Corrector solves a proximal point  
629 problem as

$$\mathbf{h}_{t_i, \text{DiffPIR}}(\mathbf{x}_{0,t_i}, \mathcal{A}, \mathbf{y}) = \arg \min_{\mathbf{x}} \|\mathbf{y} - \mathcal{A}(\mathbf{x})\|^2 + \rho_t \|\mathbf{x} - \mathbf{x}_{0,t_i}\|^2, \quad (61)$$

630 where  $\rho_t = \lambda \sigma_{\mathbf{y}}^2 \bar{\alpha}_t / (1 - \bar{\alpha}_t)$  and  $\lambda$  is a hyperparameter. The Noiser of DiffPIR is a modified version  
631 of (55) as

$$\Psi_{t_i, \text{DiffPIR}}(\hat{\mathbf{x}}_{0,t_i}) = \sqrt{\bar{\alpha}_{t_{i-1}}} \hat{\mathbf{x}}_{0,t_i} + \eta \sqrt{1 - \bar{\alpha}_{t_{i-1}}} \epsilon + \sqrt{1 - \eta^2} \frac{\sqrt{1 - \bar{\alpha}_{t_{i-1}}}}{\sqrt{1 - \bar{\alpha}_{t_i}}} \left( \mathbf{x}_{t_i} - \sqrt{\bar{\alpha}_{t_i}} \hat{\mathbf{x}}_{0,t_i} \right), \quad (62)$$

632 where they calculate an effective  $\hat{\epsilon}_{\theta}(\mathbf{x}_{t_i}, t_i)$  using the corrected sample  $\hat{\mathbf{x}}_{0,t_i}$ , and  $\epsilon \sim \mathcal{N}(\mathbf{0}, \mathbf{I})$ .

#### 633 D.7 DMPS

634 The Sampler of DMPS is the single-step DDIM (47). Consider the SVD of the observation matrix  
635  $\mathbf{A} = \mathbf{U}\Sigma\mathbf{V}^T$ , then the Corrector is

$$\mathbf{h}_{t_i, \text{DMPS}}(\mathbf{x}_{0,t_i}, \mathbf{A}, \mathbf{y}) = \mathbf{x}_{0,t_i} + \frac{1}{\sqrt{\bar{\alpha}_{t_{i-1}}}} \lambda \frac{1 - \alpha_{t_i}}{\sqrt{\bar{\alpha}_{t_i}}} \nabla_{\mathbf{x}_{t_i}} \log \tilde{p}(\mathbf{y}|\mathbf{x}_{t_i}), \quad (63)$$

636 where  $\alpha_{t_i} = \bar{\alpha}_{t_i}/\bar{\alpha}_{t_{i-1}}$  and

$$\nabla_{\mathbf{x}_{t_i}} \log \tilde{p}(\mathbf{y}|\mathbf{x}_{t_i}) = \frac{1}{\sqrt{\bar{\alpha}_{t_i}}} \mathbf{V}\Sigma \left( \sigma_{\mathbf{y}}^2 \mathbf{I} + \frac{1 - \bar{\alpha}_{t_i}}{\bar{\alpha}_{t_i}} \Sigma^2 \right)^{-1} \left( \mathbf{U}^T \mathbf{y} - \frac{1}{\sqrt{\bar{\alpha}_{t_i}}} \Sigma \mathbf{V}^T \mathbf{x}_{t_i} \right). \quad (64)$$

637 The Noiser is as (55).

## 638 D.8 ReSample

639 ReSample [12] is originally designed for latent diffusion, thus we set the Encoder and Decoder  
 640 in ReSample to identity mappings for pixel diffusion models. The Sampler of ReSample is the  
 641 single-step DDIM as (47). The Corrector is an optimization process which is termed hard data  
 642 consistency as

$$\mathbf{h}_{t_i, \text{ReSample}}(\mathbf{x}_{0,t_i}, \mathcal{A}, \mathbf{y}) = \arg \min_{\mathbf{x}} \|\mathbf{y} - \mathcal{A}(\mathbf{x})\|^2, \quad (65)$$

643 with the initial point of the optimization algorithm set as  $\mathbf{x}^{\text{init}} = \mathbf{x}_{0,t_i}$ . The Noiser of ReSample is the  
 644 ReSample method, which is

$$\Psi_{t_i, \text{ReSample}}(\hat{\mathbf{x}}_{0,t_i}) = \frac{\sigma_{t_{i-1}}^2 \sqrt{\bar{\alpha}_{t_{i-1}}} \hat{\mathbf{x}}_{0,t_i} + (1 - \bar{\alpha}_{t_{i-1}}) \mathbf{x}'_{t_i}}{\sigma_{t_{i-1}}^2 + 1 - \bar{\alpha}_{t_{i-1}}} + \sqrt{\frac{\sigma_{t_{i-1}}^2 (1 - \bar{\alpha}_{t_{i-1}})}{\sigma_{t_{i-1}}^2 + 1 - \bar{\alpha}_{t_{i-1}}}} \epsilon, \quad \epsilon \sim \mathcal{N}(\mathbf{0}, \mathbf{I}), \quad (66)$$

645 where

$$\sigma_{t_i}^2 = \gamma \left( \frac{1 - \bar{\alpha}_{t_{i-1}}}{\bar{\alpha}_{t_i}} \right) \left( 1 - \frac{\bar{\alpha}_{t_i}}{\bar{\alpha}_{t_{i-1}}} \right), \quad (67)$$

646 and

$$\mathbf{x}'_{t_i} = \sqrt{\bar{\alpha}_{t_{i-1}}} \mathbf{x}_{0,t_i} + c_1 \epsilon + c_2 \epsilon_{\theta}(\mathbf{x}_{t_i}, t_i), \quad (68)$$

647 with  $c_1 = \eta \sqrt{1 - \frac{\bar{\alpha}_{t_i}}{\bar{\alpha}_{t_{i-1}}}} \sqrt{\frac{1 - \bar{\alpha}_{t_{i-1}}}{1 - \bar{\alpha}_{t_i}}}$  and  $c_2 = \sqrt{1 - \bar{\alpha}_{t_{i-1}}} - c_1^2$ .  $\gamma$  is a hyperparameter.

## 648 D.9 DAPS

649 The Sampler of DAPS is a  $k$ -step DDIM sampler, i.e.,

$$\Phi_{t_i, \text{DAPS}} = \text{DDIM}_k(\mathbf{x}_{t_i}, t_i). \quad (69)$$

650 The Corrector follows a Langevin dynamics process, with the iteration given by

$$\mathbf{x}_{0,t_i}^{j+1} = \mathbf{x}_{0,t_i}^j - \eta_{t_i} \nabla_{\mathbf{x}_{0,t_i}^j} \left( \left\| \mathbf{x}_{0,t_i}^j - \mathbf{x}_{0,t_i} \right\|^2 / 2r_{t_i}^2 + \left\| \mathcal{A}(\mathbf{x}_{0,t_i}^j) - \mathbf{y} \right\|^2 / 2\sigma_{\mathbf{y}}^2 \right) + \sqrt{2\eta_{t_i}} \epsilon_j, \quad (70)$$

651 where  $\epsilon_j \sim \mathcal{N}(\mathbf{0}, \mathbf{I})$ , and  $r_{t_i}$  is a heuristics hyperparameter, which can be set as  $r_{t_i} = \sqrt{1 - \bar{\alpha}_{t_i}}$  [7].  
 652 The Noiser is direct noise addition as (60).

## 653 E Specific design for DDNM and DDRM on noisy linear tasks

654 DDRM and DDNM are specifically designed to take aware of the observation noise in noisy scenarios.  
 655 In particular, the variance of the additional noise is reduced such that the variance of the observation  
 656 noise adds the additional noise equal to the desired variance of the next step in the diffusion model.  
 657 This implies that in noisy linear tasks, the expected ground truth of the output of the Correctors in  
 658 DDRM and DDNM is not a noiseless image, but rather a noisy image perturbed by the observation  
 659 noise. Therefore, we adjust the ground truth for the LLE learning in noisy scenarios for DDRM and  
 660 DDNM to better align with the characteristics of these algorithms.

661 The implementation is straightforward by simply passing the noiseless image through the Correctors  
 662 of DDRM and DDNM, i.e.,

$$\mathbf{x}_{t_i, \text{gt}, \text{DDRM}}^{(n)} = \mathbf{h}_{t_i, \text{DDRM}}(\mathbf{x}_0^{(n)}, \mathbf{A}, \mathbf{y}^{(n)}), \quad (71)$$

$$\mathbf{x}_{t_i, \text{gt}, \text{DDNM}}^{(n)} = \mathbf{h}_{t_i, \text{DDNM}}(\mathbf{x}_0^{(n)}, \mathbf{A}, \mathbf{y}^{(n)}). \quad (72)$$

663 The objective for the LLE training is then

$$\min_{\gamma_{t_i, j}, \gamma_{t_i, j}^\perp, j=0, \dots, S-i} \mathbb{E}_{n \sim \mathcal{U}\{1, \dots, N\}} \mathcal{L}(\tilde{\mathbf{x}}_{0,t_i}^{(n)}, \mathbf{x}_{t_i, \text{gt}, \text{DDRM}}^{(n)}), \quad (73)$$

$$\min_{\gamma_{t_i, j}, \gamma_{t_i, j}^\perp, j=0, \dots, S-i} \mathbb{E}_{n \sim \mathcal{U}\{1, \dots, N\}} \mathcal{L}(\tilde{\mathbf{x}}_{0,t_i}^{(n)}, \mathbf{x}_{t_i, \text{gt}, \text{DDNM}}^{(n)}), \quad (74)$$

664 where the ground truth in (19) is replaced by (71) and (72). The remaining training details remain  
 665 unchanged.

## F Experimental details

### F.1 Inverse problems settings

All the linear inverse problems follow [5], while the nonlinear deblurring follows [8]. We describe the details of all these problems to maintain completeness. For  $4\times$  Super-Resolution, we use a  $4\times 4$  average pooling operation for downsampling. For Inpainting, we apply a random 50% mask to all pixels, where the mask is generated using the same random seed to ensure fairness. For anisotropic deblurring, we use Gaussian blur kernels with standard deviations of 20 and 1 in two directions, respectively. For compressed sensing, we use Walsh-Hadamard transform with a downsampling rate of 50%. For nonlinear deblurring, we adopt the neural network from [49] as the observation function. Unlike [8], we follow [14] by using a deterministic observation equation generated with a fixed random seed to ensure fairness.

For the noisy tasks, the noise standard deviation is multiplied by 2 to account for the data range of  $[-1, 1]$ , i.e., in the implementation, we actually add Gaussian noise with a standard deviation of 0.1 to the observations.

### F.2 Hyperparameters for base inverse algorithms

We carefully tune the hyperparameters of the inverse algorithms to ensure they achieve satisfactory performance under few steps. The detailed hyperparameter settings are as follows.

**DDRM.** We use the recommended values from [5], i.e.,  $\eta = 0.85$  and  $\eta_b = 1.0$ .

**DDNM.** We use the recommended value from [6], i.e.,  $\eta = 0.85$ .

**DPS.** We find that the learning rate form recommended by [8] is too small for few steps setting. Therefore, we follow the learning rate from [12], i.e.,  $\zeta_{t_i} = \zeta \sqrt{\alpha_{t_i}}$ , which demonstrated superior performance with fewer steps. The specific value of  $\zeta$  is adjusted for different tasks, as shown in Table 9. The DDIM hyperparameter  $\eta$  is set to 1.0.

Table 9: Tuned learning rate  $\zeta$  for DPS.

|           | Deblur (aniso) | Inpainting | $4\times$ SR | CS 50% | Deblur (nonlinear) |
|-----------|----------------|------------|--------------|--------|--------------------|
| CelebA-HQ | 0.5            | 1.0        | 6.0          | 0.1    | 0.1                |
| FFHQ      | 0.5            | 1.0        | 5.0          | 0.5    | 0.1                |

**IIIGDM.** We set the DDIM hyperparameter  $\eta = 1.0$ .

**RED-diff.** We set the learning rate  $\xi = 1.0$ . The weight  $\lambda$  is adjusted for different tasks, as shown in Table 10.

Table 10: Tuned weight  $\lambda$  for RED-diff.

|           | Deblur (aniso) | Inpainting | $4\times$ SR | CS 50% | Deblur (nonlinear) |
|-----------|----------------|------------|--------------|--------|--------------------|
| CelebA-HQ | 0.5            | 0.5        | 7.0          | 0.5    | 0.2                |
| FFHQ      | 0.7            | 0.4        | 5.0          | 0.5    | 0.2                |

**DiffPIR.** We set the DDIM hyperparameter  $\eta = 1.0$  and  $\lambda = 7.0$ , which performs well across all tasks. For the optimizer of the proximal point problem (61), we use the schedule-free AdamW [40], which offers better stability than SGDM in some tasks under few steps. The learning rate is set to 0.1 and the number of optimization steps is 50.

**DMPS.** We specify the DDIM parameters as  $c_1 = \eta \sqrt{1 - \bar{\alpha}_{t_{i-1}}}$ ,  $c_2 = \sqrt{1 - \eta^2} \sqrt{1 - \bar{\alpha}_{t_{i-1}}}$ , and set  $\eta = 0.85$ . The weight  $\lambda$  is set to 1.

**ReSample.** We set the DDIM hyperparameter  $\eta = 1.0$  and  $\gamma = 100$ . The optimizer for hard consistency (65) is the SGDM algorithm, with a learning rate of 0.01, momentum of 0.9, and 50

706 optimization steps.

707

708 **DAPS.** We use  $k = 5$  steps for the DDIM sampler and perform the Langevin dynamics for  
 709 100 iterations per timestep with the step size as  $\eta_{t_i} = \eta_0 (\delta + t_i/T(1 - \delta))$ , where  $\eta_0 = 0.0001$ ,  
 710  $\delta = 0.01$ , and  $T = 1000$ . For noiseless linear inverse problems, we find that replacing the gradient  
 711 term in (70) with

$$\nabla_{\mathbf{x}_{0,t_i}^j} \frac{1}{2\eta_{t_i}} \left\| \mathbf{A}\mathbf{x}_{0,t_i}^j - \mathbf{y}_0 \right\|^2 \quad (75)$$

712 leads to better results under few steps. For nonlinear problems and noisy scenarios, we follow the  
 713 original setting and set  $\sigma_y$  in (70) to 0.02 instead of 0.05 for better results, which is consistent with  
 714 the observations in [14].

715

716 In this paper, we default to sampling evenly spaced timesteps in  $[0, T]$ . For all algorithms,  
 717 we initialize from standard Gaussian noise. Specifically for RED-diff, this is equivalent to using  
 718 the random initialization method proposed in [13], which provides better stability. Starting from  
 719 intermediate steps like the original setting of [7] does not affect the applicability of our method, as  
 720 discussed in Appendix A.

### 721 E.3 Details of LLE training

722 For the training of LLE, we generate  $N = 50$  reference samples using 999-step DDIM sampler  
 723 with the corresponding diffusion model. We fix the weight of PSNR and LPIPS as  $\omega = 0.1$ . The  
 724 Schedule-free AdamW [40] is employed with the epochs set to 100 at each timestep  $t_i$  and warmup  
 725 steps set to 50. Gradients are calculated directly using the full batch. In most cases, the learning rate is  
 726 set to  $0.04/S$ , where  $S$  denotes the total number of steps used by the inverse algorithm. For ReSample  
 727 and DAPS on the nonlinear deblurring task on the FFHQ dataset, we adopt a dynamic learning rate  
 728 that at timestep  $t_i$ , the learning rate is set to  $0.2\bar{\alpha}_{t_{i+1}}/S$ . It is worth noting that we have conducted  
 729 minimal learning rate tuning for different algorithms, tasks, and steps. Such general learning rates  
 730 have already yielded satisfactory performance. In practical applications, further tuning of learning  
 731 rates and other optimization hyperparameters could potentially further enhance the performance of  
 732 LLE.

733 We design an adaptive initialization method for the learnable coefficients at each timestep. Before the  
 734 learning stage at timestep  $t_i$ , we compute the loss for  $\hat{\mathbf{x}}_{0,t_i}^{(n)}$  and  $\tilde{\mathbf{x}}_{0,t_{i+1}}^{(n)}$ ,  $n = 1, \dots, N$ , and determine  
 735 the initialization strategy accordingly. For linear inverse problems, if

$$\mathbb{E}_{n \sim \mathcal{U}\{1, \dots, N\}} \mathcal{L}(\tilde{\mathbf{x}}_{0,t_{i+1}}^{(n)}, \mathbf{x}_0^{(n)}) \geq \mathbb{E}_{n \sim \mathcal{U}\{1, \dots, N\}} \mathcal{L}(\hat{\mathbf{x}}_{0,t_i}^{(n)}, \mathbf{x}_0^{(n)}), \quad (76)$$

736 then we initialize as

$$\gamma_{t_i, S-i}^{\parallel} = \gamma_{t_i, S-i}^{\perp} = 1. \quad (77)$$

737 Otherwise, we initialize as:

$$\gamma_{t_i, S-i-1}^{\parallel} = \gamma_{t_i, S-i-1}^{\perp} = 1. \quad (78)$$

738 All other parameters are randomly sampled from  $\mathcal{N}(0, 10^{-6})$ . Intuitively, this initialization allows  
 739 the coefficients to initial with a smaller loss, thereby improving optimization efficiency.

740 For nonlinear inverse problems, we further introduce a soft initialization to prevent the algorithm  
 741 from prematurely converging to local optima. Similarly, if

$$\mathbb{E}_{n \sim \mathcal{U}\{1, \dots, N\}} \mathcal{L}(\tilde{\mathbf{x}}_{0,t_{i+1}}^{(n)}, \mathbf{x}_0^{(n)}) \geq \mathbb{E}_{n \sim \mathcal{U}\{1, \dots, N\}} \mathcal{L}(\hat{\mathbf{x}}_{0,t_i}^{(n)}, \mathbf{x}_0^{(n)}), \quad (79)$$

742 we initialize as

$$\gamma_{t_i, S-i} = 1. \quad (80)$$

743 Otherwise, we initialize as:

$$\gamma_{t_i, S-i-1} = \bar{\alpha}_{t_i}, \quad \gamma_{t_i, S-i} = 1 - \bar{\alpha}_{t_i}. \quad (81)$$

744 All other coefficients are randomly sampled from  $\mathcal{N}(0, 10^{-6})$ . This approach allows LLE to follow  
 745 the original trajectory in earlier timesteps, while searching for better linear combination coefficients  
 746 more aggressively in later timesteps.

---

**Algorithm 1** Training of LLE.

---

**Require:** Pretrained diffusion model  $\epsilon_\theta$ , discrete timesteps  $t_S, t_{S-1}, \dots, t_0$ , inverse algorithm in the canonical form  $\Phi_{t_i}, \mathbf{h}_{t_i}, \Psi_{t_i}$ , reference samples  $\mathbf{x}_0^{(1)}, \dots, \mathbf{x}_0^{(N)}$ , observation function  $\mathcal{A}$ , observation noise deviation  $\sigma_y$ .

```
1: for  $n = 1$  to  $n = N$  do
2:   Get observation  $\mathbf{y}^{(n)}$  as (5);
3: end for
4: Initialize  $\{\mathbf{x}_{t_S}^{(n)}\}_{n=1}^N$  as  $\mathbf{x}_{t_S}^{(n)} \sim \mathcal{N}(\mathbf{0}, \mathbf{I})$ ;
5: for  $i = S$  to  $i = 1$  do
6:   for  $n = 1$  to  $n = N$  do
7:     Calculate  $\hat{\mathbf{x}}_{0,t_i}^{(n)} = \mathbf{h}_{t_i}(\Phi_{t_i}(\mathbf{x}_{t_i}^{(n)}), \mathcal{A}, \mathbf{y}^{(n)})$ ;
8:   end for
9:   Optimizing  $\gamma_{t_i,0}, \dots, \gamma_{t_i,S-i}$  as (19);
10:  for  $n = 1$  to  $n = N$  do
11:    Calculate  $\tilde{\mathbf{x}}_{0,t_i}^{(n)}$  as (18);
12:    Update  $\mathbf{x}_{t_{i-1}}^{(n)} = \Psi_{t_i}(\tilde{\mathbf{x}}_{0,t_i}^{(n)})$ ;
13:  end for
14: end for
15: return Coefficients  $\gamma_{t_i,0}, \dots, \gamma_{t_i,S-i}$  for  $i = S, \dots, 1$ 
```

---

---

**Algorithm 2** Inference with LLE.

---

**Require:** Pretrained diffusion model  $\epsilon_\theta$ , discrete timesteps  $t_S, t_{S-1}, \dots, t_0$ , observation  $\mathbf{y}$ , observation function  $\mathcal{A}$ , observation noise deviation  $\sigma_y$ , inverse algorithm in the canonical form  $\Phi_{t_i}, \mathbf{h}_{t_i}, \Psi_{t_i}$ , optimized coefficients  $\gamma_{t_i,0}, \dots, \gamma_{t_i,S-i}$  for  $i = S, \dots, 1$ .

```
1: Initialize  $\mathbf{x}_{t_S} \sim \mathcal{N}(\mathbf{0}, \mathbf{I})$ ;
2: for  $i = S$  to  $i = 1$  do
3:   Calculate  $\hat{\mathbf{x}}_{0,t_i} = \mathbf{h}_{t_i}(\Phi_{t_i}(\mathbf{x}_{t_i}), \mathcal{A}, \mathbf{y})$ ;
4:   Calculate  $\tilde{\mathbf{x}}_{0,t_i}$  as (18);
5:   Update  $\mathbf{x}_{t_{i-1}} = \Psi_{t_i}(\tilde{\mathbf{x}}_{0,t_i})$ ;
6: end for
7: return  $\mathbf{x}_{t_0}$ 
```

---

## 747 G Algorithm blocks

748 Here, we present the algorithm blocks for LLE omitted in the main text. Algorithm 1 is used for LLE  
749 training, and Algorithm 2 is used for LLE inference.

## 750 H Complete quantitative results

751 Here, we present the complete results of all algorithms on the CelebA-HQ and FFHQ datasets using  
752 a total of 3, 4, 5, 7, 10, and 15 steps. PSNR, SSIM, LPIPS, and FID are reported on both noiseless  
753 and noisy tasks. The table index is illustrated in Table 11 for convenience.

Table 11: Index of tables.

|           | DDNM     | DDRM     | IIGDM    | DMPS     | RED-diff | DiffPIR  | DPS      | ReSample | DAPS     |
|-----------|----------|----------|----------|----------|----------|----------|----------|----------|----------|
| CelebA-HQ | Table 12 | Table 14 | Table 16 | Table 18 | Table 22 | Table 24 | Table 20 | Table 26 | Table 28 |
| FFHQ      | Table 13 | Table 15 | Table 17 | Table 19 | Table 23 | Table 25 | Table 21 | Table 27 | Table 29 |

Table 12: Results of DDNM on CelebA-HQ Dataset.

| Condition         | Steps | Strategy | PSNR↑/SSIM↑/LPIPS↓/FID↓                                     |                                                             |                                                             |                                                             |
|-------------------|-------|----------|-------------------------------------------------------------|-------------------------------------------------------------|-------------------------------------------------------------|-------------------------------------------------------------|
|                   |       |          | Deblur (aniso)                                              | Inpainting                                                  | 4× SR                                                       | CS 50%                                                      |
| $\sigma_y = 0.05$ | 3     | -        | 27.80 / 0.7577 / 0.3192 / 53.22                             | 16.64 / 0.4424 / 0.4923 / 73.29                             | 27.09 / <b>0.7732</b> / <b>0.2961</b> / 60.81               | 16.55 / 0.4415 / 0.5394 / <b>104.7</b>                      |
|                   |       | LLE      | <b>28.08</b> / <b>0.7842</b> / <b>0.2909</b> / <b>43.53</b> | <b>24.38</b> / <b>0.5523</b> / <b>0.4329</b> / <b>64.67</b> | <b>27.84</b> / 0.7702 / 0.2989 / <b>46.29</b>               | <b>17.29</b> / <b>0.4731</b> / <b>0.5197</b> / 155.4        |
|                   | 4     | -        | 28.98 / 0.7948 / 0.2845 / 47.36                             | 20.27 / 0.5102 / 0.4568 / 75.48                             | 28.35 / <b>0.8034</b> / 0.2758 / 59.34                      | 17.39 / 0.4464 / 0.5179 / <b>87.57</b>                      |
|                   |       | LLE      | <b>29.27</b> / <b>0.8172</b> / <b>0.2558</b> / <b>42.83</b> | <b>25.29</b> / <b>0.5915</b> / <b>0.4073</b> / <b>61.19</b> | <b>28.65</b> / 0.7921 / <b>0.2700</b> / <b>39.87</b>        | <b>18.43</b> / <b>0.4994</b> / <b>0.4742</b> / 96.63        |
|                   | 5     | -        | 29.63 / 0.8192 / 0.2590 / 45.43                             | 22.76 / 0.5501 / 0.4310 / 73.25                             | 28.97 / <b>0.8182</b> / 0.2619 / 58.20                      | 18.20 / 0.4742 / 0.4914 / 77.15                             |
|                   |       | LLE      | <b>29.82</b> / <b>0.8307</b> / <b>0.2394</b> / <b>45.10</b> | <b>26.35</b> / <b>0.6586</b> / <b>0.3661</b> / <b>54.84</b> | <b>29.02</b> / 0.8056 / <b>0.2522</b> / <b>37.16</b>        | <b>19.41</b> / <b>0.5358</b> / <b>0.4410</b> / <b>74.41</b> |
|                   | 7     | -        | 30.19 / 0.8377 / 0.2377 / 50.72                             | 25.93 / 0.6269 / 0.3880 / 68.29                             | <b>29.52</b> / <b>0.8325</b> / 0.2418 / 54.07               | 20.28 / 0.5536 / 0.4344 / 65.31                             |
|                   |       | LLE      | <b>30.29</b> / <b>0.8409</b> / <b>0.2247</b> / <b>44.66</b> | <b>27.69</b> / <b>0.7188</b> / <b>0.3279</b> / <b>50.63</b> | 29.33 / 0.8177 / <b>0.2333</b> / <b>35.57</b>               | <b>21.32</b> / <b>0.6084</b> / <b>0.3852</b> / <b>54.22</b> |
|                   | 10    | -        | 30.45 / 0.8446 / 0.2274 / 51.12                             | 28.19 / 0.7163 / 0.3325 / 60.74                             | 29.07 / <b>0.8210</b> / 0.2410 / 51.61                      | 21.30 / 0.6356 / 0.3792 / 55.50                             |
|                   |       | LLE      | <b>30.50</b> / <b>0.8454</b> / <b>0.2137</b> / <b>42.71</b> | <b>29.13</b> / <b>0.7886</b> / <b>0.2789</b> / <b>45.50</b> | <b>29.08</b> / 0.8075 / <b>0.2353</b> / <b>33.47</b>        | <b>22.42</b> / <b>0.6738</b> / <b>0.3408</b> / <b>44.97</b> |
| $\sigma_y = 0$    | 15    | -        | 30.50 / 0.8461 / 0.2165 / 47.03                             | 30.57 / 0.8206 / 0.2589 / 46.30                             | <b>29.39</b> / <b>0.8289</b> / 0.2274 / 47.58               | 23.39 / 0.7475 / 0.2961 / 38.77                             |
|                   |       | LLE      | <b>30.52</b> / <b>0.8463</b> / <b>0.2058</b> / <b>40.68</b> | <b>30.74</b> / <b>0.8540</b> / <b>0.2281</b> / <b>38.23</b> | 29.17 / 0.8120 / <b>0.2266</b> / <b>33.42</b>               | <b>24.04</b> / <b>0.7687</b> / <b>0.2706</b> / <b>31.03</b> |
|                   | 3     | -        | 39.44 / 0.9577 / 0.1004 / <b>11.60</b>                      | 19.39 / 0.4237 / 0.5946 / 137.9                             | 30.20 / 0.8603 / 0.2413 / 60.50                             | 17.27 / <b>0.5188</b> / 0.5521 / 252.3                      |
|                   |       | LLE      | <b>39.56</b> / <b>0.9588</b> / <b>0.0986</b> / 11.72        | <b>26.31</b> / <b>0.7180</b> / <b>0.3790</b> / <b>78.34</b> | <b>30.29</b> / <b>0.8628</b> / <b>0.2309</b> / <b>58.37</b> | <b>17.69</b> / 0.5185 / <b>0.5385</b> / <b>229.1</b>        |
|                   | 4     | -        | 39.80 / 0.9608 / 0.0931 / <b>9.790</b>                      | 24.11 / 0.6077 / 0.4427 / 88.72                             | <b>30.76</b> / <b>0.8728</b> / 0.2043 / 51.84               | 18.16 / 0.5751 / 0.4969 / 187.6                             |
|                   |       | LLE      | <b>39.97</b> / <b>0.9623</b> / <b>0.0914</b> / 10.01        | <b>29.03</b> / <b>0.8419</b> / <b>0.2840</b> / <b>67.03</b> | 30.71 / 0.8710 / <b>0.1979</b> / <b>48.91</b>               | <b>18.96</b> / <b>0.5840</b> / <b>0.4695</b> / <b>154.7</b> |
|                   | 5     | -        | 39.99 / 0.9623 / 0.0897 / 8.810                             | 27.83 / 0.7580 / 0.3322 / 66.63                             | <b>30.97</b> / <b>0.8766</b> / 0.1876 / 46.19               | 18.98 / 0.6191 / 0.4496 / 149.1                             |
|                   |       | LLE      | <b>40.20</b> / <b>0.9640</b> / <b>0.0865</b> / <b>8.770</b> | <b>30.93</b> / <b>0.8868</b> / <b>0.2206</b> / <b>52.78</b> | 30.90 / 0.8743 / <b>0.1823</b> / <b>43.52</b>               | <b>20.15</b> / <b>0.6395</b> / <b>0.4147</b> / <b>118.1</b> |
|                   | 7     | -        | 40.24 / 0.9643 / 0.0846 / 7.480                             | 26.20 / 0.6481 / 0.3722 / 55.35                             | <b>31.17</b> / <b>0.8802</b> / 0.1700 / 39.58               | 21.64 / 0.7143 / 0.3512 / 91.41                             |
|                   |       | LLE      | <b>40.47</b> / <b>0.9662</b> / <b>0.0815</b> / <b>7.390</b> | <b>32.56</b> / <b>0.9159</b> / <b>0.1688</b> / <b>38.79</b> | 31.04 / 0.8772 / <b>0.1663</b> / <b>38.15</b>               | <b>22.43</b> / <b>0.7270</b> / <b>0.3275</b> / <b>77.24</b> |
| $\sigma_y = 0$    | 10    | -        | 40.42 / 0.9656 / 0.0805 / 6.650                             | 33.54 / 0.9282 / 0.1440 / 30.86                             | <b>31.26</b> / <b>0.8818</b> / 0.1583 / 34.82               | 22.68 / 0.7591 / 0.2992 / 68.94                             |
|                   |       | LLE      | <b>40.70</b> / <b>0.9677</b> / <b>0.0773</b> / <b>6.500</b> | <b>33.63</b> / <b>0.9294</b> / <b>0.1386</b> / <b>29.31</b> | 31.16 / 0.8792 / <b>0.1564</b> / <b>33.90</b>               | <b>23.81</b> / <b>0.7744</b> / <b>0.2773</b> / <b>57.84</b> |
|                   | 15    | -        | 40.55 / 0.9667 / 0.0776 / 5.880                             | <b>34.57</b> / <b>0.9402</b> / <b>0.1122</b> / 22.14        | <b>31.32</b> / <b>0.8828</b> / <b>0.1506</b> / 30.93        | 25.25 / 0.8213 / 0.2347 / 43.85                             |
|                   |       | LLE      | <b>40.78</b> / <b>0.9684</b> / <b>0.0748</b> / <b>5.830</b> | 34.55 / 0.9398 / 0.1125 / <b>21.95</b>                      | 31.28 / 0.8812 / 0.1507 / <b>30.79</b>                      | <b>26.27</b> / <b>0.8316</b> / <b>0.2232</b> / <b>38.99</b> |

Table 13: Results of DDNM on FFHQ Dataset.

| Condition         | Steps | Strategy | PSNR↑/SSIM↑/LPIPS↓/FID↓                                     |                                                             |                                                             |                                                             |
|-------------------|-------|----------|-------------------------------------------------------------|-------------------------------------------------------------|-------------------------------------------------------------|-------------------------------------------------------------|
|                   |       |          | Deblur (aniso)                                              | Inpainting                                                  | 4× SR                                                       | CS 50%                                                      |
| $\sigma_y = 0.05$ | 3     | -        | 25.89 / 0.6341 / 0.4177 / 139.1                             | 16.80 / 0.3580 / 0.5557 / 167.9                             | 25.78 / 0.7327 / 0.3314 / 122.7                             | 16.27 / 0.3361 / 0.6475 / <b>227.6</b>                      |
|                   |       | LLE      | <b>26.34</b> / <b>0.6859</b> / <b>0.3836</b> / <b>127.7</b> | <b>22.56</b> / <b>0.4243</b> / <b>0.5012</b> / <b>145.0</b> | <b>26.29</b> / <b>0.7548</b> / <b>0.3012</b> / <b>107.6</b> | <b>16.84</b> / <b>0.4100</b> / <b>0.5900</b> / 280.0        |
|                   | 4     | -        | 26.98 / 0.6671 / 0.3935 / 134.8                             | 19.59 / 0.3689 / 0.5569 / 156.1                             | 27.11 / 0.7704 / 0.3086 / 120.7                             | 16.72 / 0.3048 / 0.6335 / <b>189.2</b>                      |
|                   |       | LLE      | <b>27.88</b> / <b>0.7610</b> / <b>0.3226</b> / <b>113.8</b> | <b>22.51</b> / <b>0.4773</b> / <b>0.5051</b> / <b>155.1</b> | <b>27.35</b> / <b>0.7814</b> / <b>0.2810</b> / <b>100.1</b> | <b>17.61</b> / <b>0.4246</b> / <b>0.5671</b> / 235.0        |
|                   | 5     | -        | 28.02 / 0.7290 / 0.3526 / 126.5                             | 21.30 / 0.3804 / 0.5396 / 150.5                             | 27.83 / 0.7906 / 0.2924 / 116.3                             | 17.27 / 0.3214 / 0.6059 / <b>167.0</b>                      |
|                   |       | LLE      | <b>28.72</b> / <b>0.8014</b> / <b>0.2802</b> / <b>98.94</b> | <b>23.65</b> / <b>0.5060</b> / <b>0.4737</b> / <b>133.8</b> | <b>27.96</b> / <b>0.7977</b> / <b>0.2650</b> / <b>96.46</b> | <b>18.24</b> / <b>0.4430</b> / <b>0.5400</b> / 202.4        |
|                   | 7     | -        | 29.18 / 0.8041 / 0.2859 / 102.9                             | 23.47 / 0.4379 / 0.4955 / 144.2                             | <b>28.58</b> / <b>0.8156</b> / 0.2679 / 106.0               | 18.45 / 0.3801 / 0.5531 / <b>156.1</b>                      |
|                   |       | LLE      | <b>29.42</b> / <b>0.8285</b> / <b>0.2490</b> / <b>93.16</b> | <b>24.57</b> / <b>0.5386</b> / <b>0.4461</b> / <b>124.4</b> | 28.41 / 0.8153 / <b>0.2403</b> / <b>84.21</b>               | <b>19.02</b> / <b>0.4635</b> / <b>0.5100</b> / 171.3        |
|                   | 10    | -        | <b>29.79</b> / 0.8357 / 0.2497 / 102.9                      | 25.62 / 0.5417 / 0.4336 / 134.7                             | <b>28.08</b> / <b>0.8005</b> / 0.2767 / 108.8               | 19.43 / 0.4732 / 0.4859 / 145.4                             |
|                   |       | LLE      | 29.75 / <b>0.8387</b> / <b>0.2317</b> / <b>88.46</b>        | <b>26.84</b> / <b>0.6701</b> / <b>0.3602</b> / <b>114.7</b> | 27.89 / 0.8003 / <b>0.2509</b> / <b>87.98</b>               | <b>20.33</b> / <b>0.5701</b> / <b>0.4212</b> / <b>127.5</b> |
| $\sigma_y = 0$    | 15    | -        | <b>29.98</b> / <b>0.8432</b> / 0.2379 / 96.10               | <b>28.61</b> / 0.7061 / 0.3376 / 116.9                      | <b>28.64</b> / <b>0.8168</b> / 0.2566 / 99.74               | 20.96 / 0.6274 / 0.3868 / 123.8                             |
|                   |       | LLE      | 29.87 / 0.8417 / <b>0.2207</b> / <b>81.90</b>               | 28.45 / <b>0.7891</b> / <b>0.2809</b> / <b>105.1</b>        | 28.27 / 0.8114 / <b>0.2346</b> / <b>81.65</b>               | <b>21.25</b> / <b>0.6919</b> / <b>0.3325</b> / <b>101.9</b> |
|                   | 3     | -        | 39.02 / 0.9572 / 0.1035 / <b>28.09</b>                      | 19.31 / 0.4262 / 0.6029 / 190.9                             | 28.78 / 0.8094 / 0.3083 / <b>110.8</b>                      | 17.12 / <b>0.5089</b> / 0.5750 / 342.3                      |
|                   |       | LLE      | <b>39.18</b> / <b>0.9590</b> / <b>0.1013</b> / 28.74        | <b>24.74</b> / <b>0.6379</b> / <b>0.4292</b> / <b>141.7</b> | <b>29.14</b> / <b>0.8382</b> / <b>0.2832</b> / 111.0        | <b>17.40</b> / 0.5075 / <b>0.5666</b> / <b>326.1</b>        |
|                   | 4     | -        | 39.54 / 0.9618 / 0.0917 / <b>22.70</b>                      | 23.21 / 0.5873 / 0.4732 / 152.9                             | <b>29.69</b> / 0.8549 / 0.2407 / 104.2                      | 17.55 / 0.5514 / 0.5308 / 288.4                             |
|                   |       | LLE      | <b>39.75</b> / <b>0.9637</b> / <b>0.0899</b> / 23.41        | <b>27.35</b> / <b>0.7873</b> / <b>0.3474</b> / <b>129.1</b> | 29.66 / <b>0.8551</b> / <b>0.2309</b> / <b>97.61</b>        | <b>18.19</b> / <b>0.5557</b> / <b>0.5136</b> / <b>253.2</b> |
|                   | 5     | -        | 39.82 / 0.9638 / 0.0871 / <b>20.42</b>                      | 26.34 / 0.7190 / 0.3798 / 130.3                             | <b>29.99</b> / <b>0.8646</b> / 0.2107 / 92.35               | 18.29 / 0.5912 / 0.4875 / 246.0                             |
|                   |       | LLE      | <b>40.08</b> / <b>0.9662</b> / <b>0.0843</b> / 20.56        | <b>28.71</b> / <b>0.8384</b> / <b>0.2929</b> / <b>113.8</b> | 29.94 / 0.8627 / <b>0.2060</b> / <b>90.07</b>               | <b>19.21</b> / <b>0.6046</b> / <b>0.4626</b> / <b>208.0</b> |
|                   | 7     | -        | 40.16 / 0.9661 / 0.0803 / <b>16.69</b>                      | 29.96 / 0.8636 / 0.2605 / 100.2                             | <b>30.30</b> / <b>0.8723</b> / 0.1825 / 76.87               | 19.99 / 0.6653 / 0.4097 / 179.3                             |
|                   |       | LLE      | <b>40.57</b> / <b>0.9697</b> / <b>0.0763</b> / 17.04        | <b>30.49</b> / <b>0.8827</b> / <b>0.2331</b> / <b>91.22</b> | 30.23 / 0.8700 / <b>0.1802</b> / <b>75.35</b>               | <b>20.42</b> / <b>0.6671</b> / <b>0.3959</b> / <b>166.6</b> |
| $\sigma_y = 0$    | 10    | -        | 40.56 / 0.9691 / 0.074 / <b>13.78</b>                       | 31.75 / 0.9049 / 0.1956 / 74.17                             | <b>30.50</b> / <b>0.8774</b> / 0.1657 / 64.98               | 20.61 / 0.7103 / 0.3554 / 152.5                             |
|                   |       | LLE      | <b>40.85</b> / <b>0.9713</b> / <b>0.0708</b> / 14.16        | <b>31.80</b> / <b>0.9072</b> / <b>0.1910</b> / <b>73.11</b> | 30.44 / 0.8754 / <b>0.1645</b> / <b>63.59</b>               | <b>21.45</b> / <b>0.7174</b> / <b>0.3424</b> / <b>137.4</b> |
|                   | 15    | -        | 40.89 / 0.9709 / 0.0691 / <b>11.69</b>                      | <b>33.08</b> / <b>0.9266</b> / 0.1487 / 55.23               | 30.69 / <b>0.8813</b> / 0.1527 / 54.18                      | 22.89 / 0.7816 / 0.2812 / 106.6                             |
|                   |       | LLE      | <b>41.14</b> / <b>0.9727</b> / <b>0.0657</b> / 11.95        | 33.05 / 0.9264 / <b>0.1481</b> / <b>53.90</b>               | 30.69 / 0.8806 / <b>0.1518</b> / <b>52.02</b>               | <b>23.30</b> / <b>0.7820</b> / <b>0.2744</b> / <b>97.63</b> |

Table 14: Results of DDRM on CelebA-HQ Dataset.

| Condition         | Steps | Strategy | PSNR↑/SSIM↑/LPIPS↓/FID↓                                     |                                                             |                                                             |                                                             |
|-------------------|-------|----------|-------------------------------------------------------------|-------------------------------------------------------------|-------------------------------------------------------------|-------------------------------------------------------------|
|                   |       |          | Deblur (aniso)                                              | Inpainting                                                  | 4× SR                                                       | CS 50%                                                      |
| $\sigma_y = 0.05$ | 3     | -        | 27.68 / 0.7950 / 0.2773 / 56.48                             | 16.68 / 0.4894 / 0.4403 / <b>54.28</b>                      | 26.71 / <b>0.7639</b> / <b>0.2772</b> / 45.88               | 16.58 / 0.4953 / 0.4776 / <b>90.78</b>                      |
|                   |       | LLE      | <b>27.69</b> / <b>0.7951</b> / <b>0.2713</b> / <b>52.88</b> | <b>24.53</b> / <b>0.6251</b> / <b>0.4061</b> / 64.05        | <b>27.49</b> / 0.7614 / 0.2949 / <b>41.97</b>               | <b>17.07</b> / <b>0.5269</b> / <b>0.4698</b> / 111.6        |
|                   | 4     | -        | 28.75 / 0.8159 / 0.2561 / 54.39                             | 20.48 / 0.6418 / 0.3332 / 42.93                             | 27.95 / <b>0.7966</b> / <b>0.2603</b> / 52.16               | 17.46 / 0.5547 / 0.4254 / 80.66                             |
|                   |       | LLE      | <b>28.80</b> / <b>0.8168</b> / <b>0.2469</b> / <b>48.18</b> | <b>25.01</b> / <b>0.7515</b> / <b>0.2935</b> / <b>40.65</b> | <b>28.25</b> / 0.7830 / 0.2645 / <b>36.06</b>               | <b>18.32</b> / <b>0.5857</b> / <b>0.4048</b> / <b>70.41</b> |
|                   | 5     | -        | 29.29 / 0.8258 / 0.2444 / 52.28                             | 23.21 / 0.7165 / 0.2860 / <b>44.73</b>                      | 28.58 / <b>0.8114</b> / <b>0.2472</b> / 51.07               | 18.34 / 0.5985 / 0.3886 / 71.34                             |
|                   |       | LLE      | <b>29.36</b> / <b>0.8265</b> / <b>0.2349</b> / <b>45.93</b> | <b>26.09</b> / <b>0.7801</b> / <b>0.2632</b> / 45.02        | <b>28.64</b> / 0.7955 / 0.2486 / <b>33.65</b>               | <b>19.41</b> / <b>0.6320</b> / <b>0.3630</b> / <b>53.99</b> |
|                   | 7     | -        | 29.82 / 0.8351 / 0.2315 / 49.98                             | 26.85 / 0.7957 / 0.2506 / 47.03                             | <b>29.28</b> / <b>0.8277</b> / <b>0.2302</b> / 48.74        | 20.47 / 0.6769 / 0.3292 / 60.04                             |
| $\sigma_y = 0$    |       | LLE      | <b>29.91</b> / <b>0.8365</b> / <b>0.2222</b> / <b>44.17</b> | <b>28.18</b> / <b>0.8237</b> / <b>0.2304</b> / <b>43.39</b> | 29.08 / 0.8105 / 0.2317 / <b>32.77</b>                      | <b>21.21</b> / <b>0.6951</b> / <b>0.3090</b> / <b>40.95</b> |
|                   | 10    | -        | 30.15 / 0.8411 / 0.2213 / 47.72                             | 28.97 / 0.8351 / 0.2209 / 45.04                             | 28.91 / <b>0.8181</b> / <b>0.2340</b> / 48.62               | 21.36 / 0.7135 / 0.3007 / 56.08                             |
|                   |       | LLE      | <b>30.21</b> / 0.8411 / <b>0.2119</b> / <b>41.27</b>        | <b>29.70</b> / <b>0.8507</b> / <b>0.2099</b> / <b>41.61</b> | <b>29.00</b> / 0.8043 / 0.2345 / <b>32.41</b>               | <b>22.40</b> / <b>0.7369</b> / <b>0.2769</b> / <b>38.51</b> |
|                   | 15    | -        | 30.31 / 0.8436 / 0.2141 / 45.11                             | 30.69 / 0.8678 / 0.1986 / 41.94                             | <b>29.27</b> / <b>0.8265</b> / <b>0.2232</b> / 45.37        | 23.05 / 0.7637 / 0.2632 / 48.76                             |
|                   |       | LLE      | <b>30.35</b> / <b>0.8440</b> / <b>0.2075</b> / <b>40.39</b> | <b>30.95</b> / <b>0.8737</b> / <b>0.1901</b> / <b>39.44</b> | 29.11 / 0.8094 / 0.2270 / <b>33.30</b>                      | <b>24.04</b> / <b>0.7782</b> / <b>0.2472</b> / <b>34.88</b> |
|                   | 3     | -        | <b>38.20</b> / 0.9460 / 0.1351 / 19.74                      | 19.40 / 0.4282 / 0.5959 / 137.4                             | 30.16 / 0.8584 / 0.2429 / 62.40                             | 17.25 / <b>0.5192</b> / 0.5508 / 242.5                      |
|                   |       | LLE      | 38.18 / <b>0.9493</b> / <b>0.1090</b> / <b>14.32</b>        | <b>25.99</b> / <b>0.7057</b> / <b>0.3885</b> / <b>80.58</b> | <b>30.27</b> / <b>0.8619</b> / <b>0.2327</b> / <b>60.90</b> | <b>17.64</b> / 0.5184 / <b>0.5361</b> / <b>221.6</b>        |
| $\sigma_y = 0$    | 4     | -        | <b>38.45</b> / 0.9488 / 0.1305 / 18.47                      | 23.26 / 0.5808 / 0.4700 / 98.01                             | 30.62 / <b>0.8694</b> / 0.2153 / 57.49                      | 18.08 / 0.5696 / 0.5040 / 188.3                             |
|                   |       | LLE      | 38.30 / <b>0.9506</b> / <b>0.1092</b> / <b>15.37</b>        | <b>28.01</b> / <b>0.8199</b> / <b>0.3148</b> / <b>78.35</b> | 30.62 / 0.8689 / <b>0.2072</b> / <b>54.45</b>               | <b>18.91</b> / <b>0.5809</b> / <b>0.4740</b> / <b>154.5</b> |
|                   | 5     | -        | <b>38.57</b> / 0.9501 / 0.1281 / 17.89                      | 26.09 / 0.6997 / 0.3819 / 81.43                             | <b>30.83</b> / <b>0.8731</b> / 0.2005 / 52.88               | 18.85 / 0.6065 / 0.4658 / 156.8                             |
|                   |       | LLE      | 38.51 / <b>0.9520</b> / <b>0.1064</b> / <b>14.63</b>        | <b>29.74</b> / <b>0.8657</b> / <b>0.2536</b> / <b>66.80</b> | 30.78 / 0.8719 / <b>0.1937</b> / <b>50.24</b>               | <b>19.97</b> / <b>0.6287</b> / <b>0.4275</b> / <b>124.0</b> |
|                   | 7     | -        | 38.75 / 0.9520 / 0.1248 / 16.89                             | 29.72 / 0.8506 / 0.2645 / 63.44                             | <b>31.02</b> / <b>0.8766</b> / 0.1836 / 47.48               | 21.01 / 0.6851 / 0.3853 / 109.3                             |
|                   |       | LLE      | <b>38.85</b> / <b>0.9555</b> / <b>0.1009</b> / <b>13.20</b> | <b>31.33</b> / <b>0.8975</b> / <b>0.2002</b> / <b>53.40</b> | 30.88 / 0.8738 / <b>0.1776</b> / <b>45.17</b>               | <b>21.88</b> / <b>0.7041</b> / <b>0.3518</b> / <b>89.23</b> |
|                   | 10    | -        | 38.89 / 0.9535 / 0.1221 / 16.17                             | 31.70 / 0.8974 / 0.1977 / 48.81                             | <b>31.13</b> / <b>0.8785</b> / 0.1723 / 43.07               | 21.77 / 0.7239 / 0.3402 / 89.77                             |
| $\sigma_y = 0$    |       | LLE      | <b>38.97</b> / <b>0.9563</b> / <b>0.0993</b> / <b>12.67</b> | <b>32.45</b> / <b>0.9138</b> / <b>0.1642</b> / <b>41.39</b> | 30.94 / 0.8750 / <b>0.1676</b> / <b>41.16</b>               | <b>22.83</b> / <b>0.7433</b> / <b>0.3093</b> / <b>73.65</b> |
|                   | 15    | -        | 39.01 / 0.9548 / 0.1193 / 15.56                             | 33.22 / 0.9233 / 0.1439 / 35.08                             | <b>31.20</b> / <b>0.8799</b> / 0.1638 / 39.22               | 23.58 / 0.7785 / 0.2810 / 67.44                             |
|                   |       | LLE      | <b>39.07</b> / <b>0.9571</b> / <b>0.0983</b> / <b>12.65</b> | <b>33.41</b> / <b>0.9256</b> / <b>0.1361</b> / <b>32.66</b> | 30.96 / 0.8758 / <b>0.1609</b> / <b>38.41</b>               | <b>24.58</b> / <b>0.7923</b> / <b>0.2610</b> / <b>57.46</b> |

Table 15: Results of DDRM on FFHQ Dataset.

| Condition         | Steps | Strategy | PSNR↑/SSIM↑/LPIPS↓/FID↓                              |                                                             |                                                             |                                                             |
|-------------------|-------|----------|------------------------------------------------------|-------------------------------------------------------------|-------------------------------------------------------------|-------------------------------------------------------------|
|                   |       |          | Deblur (aniso)                                       | Inpainting                                                  | 4× SR                                                       | CS 50%                                                      |
| $\sigma_y = 0.05$ | 3     | -        | <b>26.38</b> / 0.7630 / 0.3048 / 113.2               | 16.89 / 0.4327 / 0.5204 / 160.3                             | 25.27 / 0.6956 / 0.3481 / 105.8                             | 16.44 / 0.4806 / <b>0.5110</b> / <b>185.5</b>               |
|                   |       | LLE      | 26.35 / <b>0.7656</b> / <b>0.2972</b> / <b>105.2</b> | <b>23.63</b> / <b>0.5403</b> / <b>0.4618</b> / <b>142.1</b> | <b>25.90</b> / <b>0.7364</b> / <b>0.3107</b> / <b>101.5</b> | <b>17.01</b> / <b>0.5104</b> / 0.5255 / 228.4               |
|                   | 4     | -        | <b>27.62</b> / 0.7933 / 0.2796 / 105.5               | 20.32 / 0.5984 / 0.4063 / 129.0                             | 26.69 / 0.7622 / 0.2912 / 101.2                             | 17.16 / 0.5367 / 0.4583 / 152.4                             |
|                   |       | LLE      | 27.59 / <b>0.7947</b> / <b>0.2686</b> / <b>96.91</b> | <b>24.89</b> / <b>0.7194</b> / <b>0.3636</b> / <b>124.5</b> | <b>26.83</b> / <b>0.7689</b> / <b>0.2755</b> / <b>90.59</b> | <b>17.82</b> / <b>0.5662</b> / <b>0.4381</b> / <b>145.2</b> |
|                   | 5     | -        | <b>28.28</b> / 0.8083 / 0.2667 / 101.3               | 22.66 / 0.6809 / 0.3447 / 110.5                             | <b>27.43</b> / 0.7853 / 0.2708 / 94.13                      | 17.62 / 0.5713 / 0.4244 / 142.8                             |
|                   |       | LLE      | 28.27 / <b>0.8098</b> / <b>0.2540</b> / <b>90.18</b> | <b>25.09</b> / <b>0.7535</b> / <b>0.3078</b> / <b>103.8</b> | 27.41 / <b>0.7870</b> / <b>0.2564</b> / <b>86.64</b>        | <b>18.57</b> / <b>0.6031</b> / <b>0.4001</b> / <b>125.7</b> |
|                   | 7     | -        | <b>29.02</b> / <b>0.8243</b> / 0.2510 / 94.13        | 25.82 / 0.7682 / 0.2736 / 100.0                             | <b>28.32</b> / <b>0.8100</b> / 0.2497 / 91.05               | 19.11 / 0.6373 / 0.3692 / 121.2                             |
| $\sigma_y = 0$    |       | LLE      | 28.95 / 0.8237 / <b>0.2382</b> / <b>86.66</b>        | <b>26.86</b> / <b>0.7958</b> / <b>0.2620</b> / <b>94.19</b> | 27.99 / 0.8051 / <b>0.2347</b> / <b>77.00</b>               | <b>19.76</b> / <b>0.6508</b> / <b>0.3565</b> / <b>106.2</b> |
|                   | 10    | -        | <b>29.51</b> / <b>0.8344</b> / 0.2406 / 88.23        | 27.83 / 0.8134 / 0.2360 / 89.04                             | <b>27.91</b> / <b>0.7974</b> / 0.2636 / 99.40               | 19.78 / 0.6701 / 0.3392 / 115.5                             |
|                   |       | LLE      | 29.42 / 0.8331 / <b>0.2276</b> / <b>79.88</b>        | <b>28.41</b> / <b>0.8305</b> / <b>0.2297</b> / <b>86.32</b> | 27.68 / 0.7953 / <b>0.2448</b> / <b>84.89</b>               | <b>20.46</b> / <b>0.6874</b> / <b>0.3197</b> / <b>98.19</b> |
|                   | 15    | -        | <b>29.79</b> / <b>0.8405</b> / 0.2339 / 87.79        | 29.75 / 0.8553 / 0.2027 / 78.33                             | <b>28.49</b> / <b>0.8138</b> / 0.2472 / 90.30               | 20.84 / 0.7226 / 0.2930 / 97.31                             |
|                   |       | LLE      | 29.68 / 0.8385 / <b>0.2215</b> / <b>78.71</b>        | <b>29.97</b> / <b>0.8634</b> / <b>0.1956</b> / <b>70.99</b> | 28.09 / 0.8074 / <b>0.2315</b> / <b>78.48</b>               | <b>21.59</b> / <b>0.7343</b> / <b>0.2824</b> / <b>87.52</b> |
|                   | 3     | -        | <b>37.53</b> / <b>0.9377</b> / 0.1536 / 41.15        | 19.36 / 0.4288 / 0.6010 / 191.8                             | 28.84 / 0.8137 / 0.3057 / <b>112.2</b>                      | 17.02 / 0.5058 / 0.5759 / 351.5                             |
|                   |       | LLE      | 37.07 / 0.9369 / <b>0.1265</b> / <b>33.44</b>        | <b>24.63</b> / <b>0.6309</b> / <b>0.4317</b> / <b>143.1</b> | <b>29.08</b> / <b>0.8367</b> / <b>0.2855</b> / 115.6        | <b>17.30</b> / <b>0.5068</b> / <b>0.5670</b> / <b>332.6</b> |
| $\sigma_y = 0$    | 4     | -        | <b>37.88</b> / <b>0.9419</b> / 0.1478 / 38.74        | 22.67 / 0.5637 / 0.4968 / 158.9                             | 29.58 / 0.8527 / 0.2542 / 110.4                             | 17.70 / 0.5525 / 0.5345 / 290.5                             |
|                   |       | LLE      | 37.36 / 0.9409 / <b>0.1216</b> / <b>34.50</b>        | <b>26.89</b> / <b>0.7763</b> / <b>0.3610</b> / <b>133.7</b> | <b>29.62</b> / <b>0.8543</b> / <b>0.2537</b> / <b>109.0</b> | <b>18.17</b> / <b>0.5529</b> / <b>0.5166</b> / <b>255.6</b> |
|                   | 5     | -        | <b>38.04</b> / 0.9437 / 0.1450 / 36.86               | 25.05 / 0.6661 / 0.4236 / 140.8                             | 29.84 / <b>0.8614</b> / <b>0.2286</b> / 101.0               | 18.22 / 0.5826 / 0.5022 / 253.0                             |
|                   |       | LLE      | 37.62 / <b>0.9445</b> / <b>0.1168</b> / <b>32.09</b> | <b>27.77</b> / <b>0.8126</b> / <b>0.3256</b> / <b>125.9</b> | <b>29.86</b> / 0.8604 / 0.2310 / <b>99.36</b>               | <b>18.93</b> / <b>0.5906</b> / <b>0.4778</b> / <b>223.7</b> |
|                   | 7     | -        | <b>38.30</b> / 0.9463 / 0.1405 / 34.06               | 27.98 / 0.7999 / 0.3295 / 121.4                             | <b>30.13</b> / <b>0.8687</b> / <b>0.2017</b> / <b>89.48</b> | 19.17 / 0.6344 / 0.4473 / 207.5                             |
|                   |       | LLE      | 37.99 / <b>0.9488</b> / <b>0.1085</b> / <b>28.14</b> | <b>29.35</b> / <b>0.8575</b> / <b>0.2753</b> / <b>107.9</b> | 30.08 / 0.8679 / 0.2018 / 89.76                             | <b>19.97</b> / <b>0.6474</b> / <b>0.4191</b> / <b>176.6</b> |
|                   | 10    | -        | <b>38.53</b> / 0.9485 / 0.1367 / 32.84               | 29.95 / 0.8623 / 0.2651 / 102.3                             | <b>30.40</b> / <b>0.8742</b> / 0.1817 / 77.48               | 20.16 / 0.6809 / 0.3981 / 172.6                             |
| $\sigma_y = 0$    |       | LLE      | 38.18 / <b>0.9510</b> / <b>0.1047</b> / <b>26.50</b> | <b>30.61</b> / <b>0.8869</b> / <b>0.2321</b> / <b>92.88</b> | 30.25 / 0.8723 / <b>0.1810</b> / <b>76.35</b>               | <b>20.88</b> / <b>0.6890</b> / <b>0.3727</b> / <b>153.9</b> |
|                   | 15    | -        | <b>38.77</b> / 0.9506 / 0.1331 / 30.91               | 31.65 / 0.9027 / 0.2019 / 81.93                             | <b>30.64</b> / <b>0.8797</b> / 0.1673 / 66.16               | 21.36 / 0.7302 / 0.3386 / 141.0                             |
|                   |       | LLE      | 38.41 / <b>0.9541</b> / <b>0.1006</b> / <b>25.90</b> | <b>31.82</b> / <b>0.9087</b> / <b>0.1900</b> / <b>75.74</b> | 30.34 / 0.8761 / <b>0.1648</b> / <b>64.45</b>               | <b>22.20</b> / <b>0.7394</b> / <b>0.3218</b> / <b>124.8</b> |



Table 16: Results of IIGDM on CelebA-HQ Dataset.

| Condition         | Steps | Strategy | PSNR↑/SSIM↑/LPIPS↓/FID↓                |                                        |                                        |                                        |
|-------------------|-------|----------|----------------------------------------|----------------------------------------|----------------------------------------|----------------------------------------|
|                   |       |          | Deblur (aniso)                         | Inpainting                             | 4× SR                                  | CS 50%                                 |
| $\sigma_y = 0.05$ | 3     | -        | 20.39 / 0.5361 / 0.5197 / <b>105.3</b> | 19.57 / 0.5333 / 0.4947 / 116.5        | 20.73 / 0.5519 / 0.5000 / <b>104.5</b> | 16.79 / 0.4721 / 0.5546 / <b>114.8</b> |
|                   |       | LLE      | <b>21.73 / 0.5877 / 0.4894 / 115.0</b> | <b>20.72 / 0.5712 / 0.4829 / 109.4</b> | <b>21.54 / 0.5833 / 0.4896 / 119.7</b> | <b>17.30 / 0.4871 / 0.5396 / 126.4</b> |
|                   | 4     | -        | 19.80 / 0.5735 / 0.5076 / 87.53        | 21.85 / 0.6390 / 0.4126 / 84.91        | 19.94 / 0.5874 / 0.4743 / <b>76.88</b> | 16.47 / 0.5005 / 0.5650 / 91.76        |
|                   |       | LLE      | <b>24.14 / 0.6780 / 0.4062 / 79.73</b> | <b>23.61 / 0.6805 / 0.3808 / 81.92</b> | <b>24.09 / 0.6793 / 0.3973 / 82.33</b> | <b>18.71 / 0.5615 / 0.4722 / 88.50</b> |
|                   | 5     | -        | 22.46 / 0.6530 / 0.4410 / 71.32        | 22.63 / 0.6945 / 0.3761 / 73.49        | 21.93 / 0.6620 / 0.4157 / <b>65.21</b> | 16.32 / 0.5179 / 0.5407 / 85.88        |
|                   |       | LLE      | <b>25.95 / 0.7339 / 0.3473 / 64.37</b> | <b>25.21 / 0.7349 / 0.3358 / 70.90</b> | <b>25.67 / 0.7308 / 0.3382 / 66.20</b> | <b>19.33 / 0.5914 / 0.4480 / 80.27</b> |
|                   | 7     | -        | 25.75 / 0.7411 / 0.3284 / <b>50.28</b> | 26.47 / 0.7827 / 0.3012 / 62.67        | 24.78 / 0.7349 / 0.3304 / 56.29        | 15.05 / 0.4831 / 0.5576 / 107.2        |
| $\sigma_y = 0$    |       | LLE      | <b>28.29 / 0.7956 / 0.2724 / 52.73</b> | <b>28.02 / 0.8050 / 0.2730 / 55.70</b> | <b>27.70 / 0.7851 / 0.2715 / 48.56</b> | <b>21.07 / 0.6743 / 0.3682 / 63.42</b> |
|                   | 10    | -        | 28.69 / 0.8064 / 0.2511 / 48.65        | 29.98 / 0.8458 / 0.2477 / 55.63        | 27.84 / 0.7993 / 0.2600 / 51.35        | 15.50 / 0.5215 / 0.5031 / 106.4        |
|                   |       | LLE      | <b>29.28 / 0.8179 / 0.2312 / 43.38</b> | <b>30.15 / 0.8488 / 0.2388 / 50.99</b> | <b>28.64 / 0.8098 / 0.2358 / 49.96</b> | <b>22.10 / 0.7275 / 0.3210 / 55.16</b> |
|                   | 15    | -        | 29.57 / 0.8265 / 0.2260 / 46.79        | 31.69 / 0.8761 / 0.2211 / 51.18        | <b>28.96 / 0.8199 / 0.2356 / 48.03</b> | 16.12 / 0.5698 / 0.4458 / 99.84        |
|                   |       | LLE      | <b>29.80 / 0.8293 / 0.2134 / 42.07</b> | <b>31.77 / 0.8783 / 0.2136 / 47.69</b> | 28.84 / 0.8145 / <b>0.2230 / 44.47</b> | <b>23.89 / 0.7831 / 0.2718 / 49.05</b> |
|                   | 3     | -        | 30.11 / 0.8743 / 0.2294 / 37.23        | 24.41 / 0.7327 / 0.3773 / 96.26        | 26.35 / 0.7537 / 0.4303 / 83.16        | 18.24 / 0.5220 / 0.5807 / 213.2        |
|                   |       | LLE      | <b>33.83 / 0.9179 / 0.1733 / 31.16</b> | <b>25.57 / 0.7843 / 0.3228 / 79.60</b> | <b>27.71 / 0.7988 / 0.3578 / 73.76</b> | <b>18.54 / 0.5507 / 0.5414 / 181.7</b> |
| $\sigma_y = 0$    | 4     | -        | 29.49 / 0.8869 / 0.2219 / 36.99        | 26.36 / 0.8115 / 0.3054 / 81.42        | 26.11 / 0.7698 / 0.3910 / 76.90        | 18.00 / 0.5318 / 0.5774 / 195.4        |
|                   |       | LLE      | <b>34.78 / 0.9313 / 0.1534 / 27.68</b> | <b>28.03 / 0.8450 / 0.2539 / 67.84</b> | <b>28.61 / 0.8254 / 0.2944 / 68.51</b> | <b>19.72 / 0.6157 / 0.4733 / 128.5</b> |
|                   | 5     | -        | 32.93 / 0.9219 / 0.1697 / 26.36        | 27.12 / 0.8365 / 0.2734 / 72.99        | 27.78 / 0.8077 / 0.3293 / 65.38        | 17.16 / 0.5269 / 0.5723 / 196.6        |
|                   |       | LLE      | <b>35.38 / 0.9377 / 0.1397 / 26.30</b> | <b>29.47 / 0.8712 / 0.2196 / 60.17</b> | <b>29.47 / 0.8441 / 0.2602 / 62.04</b> | <b>20.18 / 0.6389 / 0.4475 / 118.2</b> |
|                   | 7     | -        | 35.98 / 0.9437 / 0.1293 / <b>20.86</b> | 30.49 / 0.8899 / 0.1983 / 51.95        | 29.44 / 0.8446 / 0.2499 / 53.66        | 15.53 / 0.4954 / 0.5831 / 218.7        |
|                   |       | LLE      | <b>36.80 / 0.9505 / 0.1142 / 24.89</b> | <b>31.76 / 0.9038 / 0.1773 / 47.25</b> | <b>30.75 / 0.8709 / 0.2095 / 51.95</b> | <b>21.70 / 0.7147 / 0.3571 / 82.28</b> |
|                   | 10    | -        | <b>37.87 / 0.9573 / 0.1015 / 21.19</b> | 33.32 / 0.9209 / 0.1546 / 39.95        | 30.65 / 0.8734 / 0.1947 / 45.85        | 15.83 / 0.5335 / 0.5260 / 181.9        |
| $\sigma_y = 0$    |       | LLE      | <b>37.83 / 0.9578 / 0.0992 / 23.67</b> | <b>33.44 / 0.9221 / 0.1531 / 39.85</b> | <b>31.27 / 0.8810 / 0.1838 / 45.55</b> | <b>22.58 / 0.7606 / 0.3053 / 66.55</b> |
|                   | 15    | -        | <b>38.44 / 0.9619 / 0.0913 / 23.20</b> | 34.69 / <b>0.9343 / 0.1378 / 35.86</b> | 31.11 / 0.8826 / 0.1758 / 42.07        | 16.39 / 0.5868 / 0.4567 / 141.2        |
|                   |       | LLE      | <b>38.39 / 0.9618 / 0.0905 / 23.48</b> | 34.69 / 0.9341 / <b>0.1355 / 34.85</b> | <b>31.29 / 0.8834 / 0.1684 / 40.51</b> | <b>24.46 / 0.8165 / 0.2444 / 51.69</b> |

Table 17: Results of IIGDM on FFHQ Dataset.

| Condition         | Steps | Strategy | PSNR↑/SSIM↑/LPIPS↓/FID↓                |                                        |                                        |                                        |
|-------------------|-------|----------|----------------------------------------|----------------------------------------|----------------------------------------|----------------------------------------|
|                   |       |          | Deblur (aniso)                         | Inpainting                             | 4× SR                                  | CS 50%                                 |
| $\sigma_y = 0.05$ | 3     | -        | 20.72 / 0.5570 / 0.5370 / <b>188.9</b> | 19.23 / 0.5259 / 0.5169 / 178.7        | 20.85 / 0.5671 / 0.5154 / 182.9        | 16.81 / 0.4767 / 0.5761 / <b>186.0</b> |
|                   |       | LLE      | <b>21.51 / 0.5835 / 0.5110 / 190.7</b> | <b>20.51 / 0.5686 / 0.5008 / 174.1</b> | <b>21.20 / 0.5746 / 0.5112 / 178.8</b> | <b>17.11 / 0.4906 / 0.5566 / 187.3</b> |
|                   | 4     | -        | 19.59 / 0.5583 / 0.5305 / 181.1        | 21.44 / 0.6209 / 0.4475 / 151.9        | 19.84 / 0.5784 / 0.4999 / 159.8        | 16.25 / 0.4837 / 0.5922 / 179.9        |
|                   |       | LLE      | <b>23.91 / 0.6670 / 0.4366 / 149.6</b> | <b>22.48 / 0.6483 / 0.4300 / 144.7</b> | <b>23.67 / 0.6614 / 0.4324 / 153.7</b> | <b>18.11 / 0.5407 / 0.5097 / 164.0</b> |
|                   | 5     | -        | 20.88 / 0.6145 / 0.5010 / 174.2        | 21.98 / 0.6700 / 0.4142 / 141.5        | 20.63 / 0.6284 / 0.4687 / 145.3        | 15.20 / 0.4723 / 0.6143 / 199.1        |
|                   |       | LLE      | <b>25.38 / 0.7159 / 0.3787 / 126.1</b> | <b>24.35 / 0.7080 / 0.3772 / 138.7</b> | <b>24.96 / 0.7093 / 0.3757 / 129.4</b> | <b>18.53 / 0.5754 / 0.4835 / 147.6</b> |
|                   | 7     | -        | 23.21 / 0.6856 / 0.4234 / 156.8        | 25.07 / 0.7515 / 0.3491 / 133.2        | 22.43 / 0.6891 / 0.4114 / 136.3        | 13.42 / 0.4161 / 0.6818 / 238.3        |
| $\sigma_y = 0$    |       | LLE      | <b>27.27 / 0.7752 / 0.3095 / 109.9</b> | <b>26.32 / 0.7620 / 0.3289 / 124.4</b> | <b>26.53 / 0.7585 / 0.3112 / 112.2</b> | <b>19.60 / 0.6378 / 0.4331 / 130.9</b> |
|                   | 10    | -        | 26.13 / 0.7565 / 0.3158 / 132.1        | 28.37 / <b>0.8130 / 0.2902 / 120.7</b> | 25.46 / 0.7564 / 0.3229 / 131.2        | 13.89 / 0.4474 / 0.6421 / 239.7        |
|                   |       | LLE      | <b>28.51 / 0.8056 / 0.2648 / 100.3</b> | <b>28.43 / 0.8104 / 0.2876 / 116.8</b> | <b>27.45 / 0.7855 / 0.2765 / 102.9</b> | <b>20.24 / 0.6834 / 0.3833 / 117.0</b> |
|                   | 15    | -        | 28.02 / 0.7871 / 0.2658 / 104.3        | <b>30.44 / 0.8527 / 0.2552 / 108.3</b> | 27.64 / 0.7913 / 0.2679 / <b>97.82</b> | 13.99 / 0.4936 / 0.5747 / 240.8        |
|                   |       | LLE      | <b>29.14 / 0.8216 / 0.2472 / 97.73</b> | 30.28 / 0.8503 / <b>0.2511 / 105.2</b> | <b>27.89 / 0.7965 / 0.2598 / 97.97</b> | <b>24.59 / 0.7952 / 0.2756 / 99.09</b> |
|                   | 3     | -        | 31.75 / 0.9038 / 0.1889 / 67.86        | 24.06 / 0.7379 / 0.3826 / 169.9        | 26.78 / 0.7761 / 0.4028 / 150.0        | 18.25 / 0.5509 / 0.5430 / 323.8        |
|                   |       | LLE      | <b>35.39 / 0.9393 / 0.1358 / 44.26</b> | <b>25.56 / 0.7971 / 0.3204 / 148.8</b> | <b>27.39 / 0.8020 / 0.3478 / 142.6</b> | <b>18.47 / 0.5673 / 0.5226 / 290.6</b> |
| $\sigma_y = 0$    | 4     | -        | 26.67 / 0.8661 / 0.2494 / 108.7        | 26.02 / 0.8131 / 0.3082 / 140.4        | 24.15 / 0.7344 / 0.4280 / 167.7        | 17.49 / 0.5334 / 0.5652 / 325.6        |
|                   |       | LLE      | <b>36.21 / 0.9478 / 0.1197 / 37.71</b> | <b>27.28 / 0.8406 / 0.2629 / 129.4</b> | <b>28.26 / 0.8254 / 0.3002 / 128.6</b> | <b>19.16 / 0.6139 / 0.4703 / 237.2</b> |
|                   | 5     | -        | 27.90 / 0.8962 / 0.2210 / 105.4        | 26.48 / 0.8310 / 0.2826 / 131.4        | 25.31 / 0.7630 / 0.3935 / 155.6        | 15.94 / 0.5053 / 0.5858 / 345.1        |
|                   |       | LLE      | <b>36.96 / 0.9531 / 0.1085 / 33.22</b> | <b>28.77 / 0.8707 / 0.2228 / 111.4</b> | <b>28.81 / 0.8383 / 0.2710 / 118.9</b> | <b>19.41 / 0.6391 / 0.4487 / 212.0</b> |
|                   | 7     | -        | 30.26 / 0.9213 / 0.1882 / 105.7        | 29.37 / 0.8829 / 0.2083 / 94.56        | 26.42 / 0.7816 / 0.3489 / 149.1        | 13.87 / 0.4492 / 0.6354 / 373.8        |
|                   |       | LLE      | <b>37.71 / 0.9610 / 0.0893 / 27.10</b> | <b>30.42 / 0.8938 / 0.1899 / 88.12</b> | <b>29.97 / 0.8646 / 0.2211 / 98.01</b> | <b>20.25 / 0.6984 / 0.3756 / 165.7</b> |
|                   | 10    | -        | 36.16 / 0.9572 / 0.1118 / 50.10        | <b>32.37 / 0.9161 / 0.1553 / 63.87</b> | 28.07 / 0.8285 / 0.2533 / 111.5        | 14.22 / 0.4801 / 0.5940 / 317.6        |
| $\sigma_y = 0$    |       | LLE      | <b>39.26 / 0.9684 / 0.0712 / 19.95</b> | 32.28 / 0.9135 / 0.1579 / 65.59        | <b>30.61 / 0.8785 / 0.1858 / 76.62</b> | <b>20.67 / 0.7351 / 0.3322 / 141.4</b> |
|                   | 15    | -        | <b>40.37 / 0.9732 / 0.0701 / 19.31</b> | <b>34.18 / 0.9332 / 0.1333 / 51.88</b> | 29.02 / 0.8546 / 0.1984 / 80.09        | 14.17 / 0.5222 / 0.5378 / 272.4        |
|                   |       | LLE      | <b>39.92 / 0.9724 / 0.0642 / 19.22</b> | 33.96 / 0.9317 / <b>0.1324 / 51.07</b> | <b>30.93 / 0.8861 / 0.1714 / 65.55</b> | <b>25.61 / 0.8493 / 0.1984 / 72.41</b> |

Table 18: Results of DMPS on CelebA-HQ Dataset.

| Condition         | Steps | Strategy | PSNR↑/SSIM↑/LPIPS↓/FID↓                |                                        |                                        |                                        |
|-------------------|-------|----------|----------------------------------------|----------------------------------------|----------------------------------------|----------------------------------------|
|                   |       |          | Deblur (aniso)                         | Inpainting                             | 4× SR                                  | CS 50%                                 |
| $\sigma_y = 0.05$ | 3     | -        | 5.540 / 0.0053 / 0.9214 / 449.0        | 6.440 / 0.0078 / 0.9203 / 416.2        | 7.210 / 0.0181 / 0.8951 / 412.1        | 5.720 / 0.0054 / 0.9235 / 432.0        |
|                   |       | LLE      | <b>11.45 / 0.0434 / 0.8130 / 338.9</b> | <b>11.52 / 0.0688 / 0.8164 / 363.8</b> | <b>18.11 / 0.2371 / 0.7882 / 259.9</b> | <b>12.14 / 0.0762 / 0.8186 / 367.4</b> |
|                   | 4     | -        | 5.890 / 0.0091 / 0.9119 / 454.0        | 6.360 / 0.0078 / 0.9202 / 424.4        | 7.700 / 0.0227 / 0.9032 / 405.3        | 5.850 / 0.0064 / 0.9220 / 422.3        |
|                   |       | LLE      | <b>12.89 / 0.0825 / 0.8234 / 280.1</b> | <b>12.81 / 0.1008 / 0.8134 / 254.6</b> | <b>22.18 / 0.4040 / 0.6533 / 107.8</b> | <b>13.77 / 0.1170 / 0.7764 / 393.3</b> |
|                   | 5     | -        | 5.780 / 0.0074 / 0.9172 / 495.3        | 6.480 / 0.0083 / 0.9195 / 427.8        | 9.220 / 0.0357 / 0.9004 / 371.1        | 5.880 / 0.0062 / 0.9220 / 426.1        |
|                   |       | LLE      | <b>16.65 / 0.1639 / 0.7324 / 131.6</b> | <b>14.77 / 0.1353 / 0.7597 / 170.9</b> | <b>24.76 / 0.5282 / 0.5170 / 67.21</b> | <b>14.66 / 0.1547 / 0.7423 / 337.6</b> |
|                   | 7     | -        | 5.430 / 0.0058 / 0.9251 / 502.2        | 6.760 / 0.0077 / 0.9180 / 438.2        | 8.550 / 0.031 / 0.8946 / 363.6         | 6.210 / 0.0061 / 0.9212 / 431.2        |
|                   |       | LLE      | <b>22.48 / 0.3622 / 0.5514 / 78.02</b> | <b>18.11 / 0.2301 / 0.6544 / 118.9</b> | <b>26.27 / 0.6575 / 0.3936 / 50.88</b> | <b>16.01 / 0.2300 / 0.6690 / 170.6</b> |
| $\sigma_y = 0$    | 10    | -        | 25.27 / 0.5064 / 0.4439 / 56.07        | 16.74 / 0.1759 / 0.7006 / 116.5        | <b>27.86 / 0.7248 / 0.3425 / 45.10</b> | 14.91 / 0.1538 / 0.7179 / 192.9        |
|                   |       | LLE      | <b>26.54 / 0.5773 / 0.4051 / 53.03</b> | <b>23.01 / 0.4236 / 0.4912 / 63.78</b> | <b>27.72 / 0.7528 / 0.2976 / 41.67</b> | <b>18.49 / 0.3584 / 0.5461 / 90.12</b> |
|                   | 15    | -        | 28.65 / 0.7234 / 0.3005 / 35.61        | 21.82 / 0.3564 / 0.5350 / 71.44        | <b>28.63 / 0.8005 / 0.2491 / 36.43</b> | 18.47 / 0.3153 / 0.5728 / 102.4        |
|                   |       | LLE      | <b>28.93 / 0.7459 / 0.2873 / 33.97</b> | <b>25.36 / 0.5604 / 0.4113 / 53.76</b> | 28.22 / 0.7946 / 0.2466 / 37.68        | <b>20.52 / 0.4838 / 0.4580 / 66.70</b> |
|                   | 3     | -        | 6.110 / 0.0126 / 0.9156 / 393.5        | 6.620 / 0.0112 / 0.9166 / 405.9        | 9.950 / 0.0612 / 0.8673 / 361.4        | 6.070 / 0.0092 / 0.9186 / 394.5        |
|                   |       | LLE      | <b>24.98 / 0.5189 / 0.4017 / 51.36</b> | <b>13.80 / 0.1840 / 0.7600 / 217.7</b> | <b>27.03 / 0.7732 / 0.4997 / 109.9</b> | <b>16.17 / 0.3714 / 0.6487 / 407.2</b> |
|                   | 4     | -        | 5.710 / 0.0088 / 0.9200 / 415.6        | 6.170 / 0.0081 / 0.9209 / 425.6        | 9.170 / 0.0448 / 0.8829 / 372.1        | 5.650 / 0.0064 / 0.9229 / 421.2        |
| $\sigma_y = 0$    |       | LLE      | <b>27.90 / 0.6490 / 0.3183 / 41.43</b> | <b>14.61 / 0.1875 / 0.7394 / 190.0</b> | <b>27.25 / 0.7101 / 0.4522 / 75.19</b> | <b>16.32 / 0.3915 / 0.6368 / 392.0</b> |
|                   | 5     | -        | 5.910 / 0.0111 / 0.9174 / 401.2        | 6.360 / 0.0096 / 0.9194 / 415.8        | 10.73 / 0.0665 / 0.8787 / 351.1        | 5.820 / 0.0078 / 0.9208 / 405.6        |
|                   |       | LLE      | <b>28.94 / 0.6982 / 0.2863 / 37.72</b> | <b>16.85 / 0.2300 / 0.6711 / 145.1</b> | <b>28.57 / 0.7579 / 0.3128 / 51.31</b> | <b>16.50 / 0.4089 / 0.6233 / 370.9</b> |
|                   | 7     | -        | 5.250 / 0.0061 / 0.9228 / 428.3        | 6.000 / 0.0064 / 0.9230 / 438.5        | 8.140 / 0.0368 / 0.8789 / 366.3        | 5.220 / 0.0048 / 0.9256 / 432.4        |
|                   |       | LLE      | <b>31.19 / 0.7853 / 0.2248 / 29.50</b> | <b>20.85 / 0.3984 / 0.5380 / 111.5</b> | <b>29.44 / 0.8203 / 0.2580 / 50.64</b> | <b>17.29 / 0.4345 / 0.5737 / 252.1</b> |
|                   | 10    | -        | 25.76 / 0.6363 / 0.3280 / 45.89        | 20.67 / 0.4443 / 0.5319 / 91.88        | 29.80 / 0.8124 / 0.2560 / 44.62        | 17.40 / 0.4532 / 0.5574 / 228.1        |
|                   |       | LLE      | <b>32.23 / 0.8288 / 0.1889 / 23.23</b> | <b>26.72 / 0.6933 / 0.3579 / 59.77</b> | <b>29.89 / 0.8461 / 0.2129 / 43.73</b> | <b>19.71 / 0.5756 / 0.4638 / 128.8</b> |
| $\sigma_y = 0$    | 15    | -        | 31.22 / 0.7975 / 0.2026 / 24.48        | 26.04 / 0.6688 / 0.3702 / 61.75        | <b>30.53 / 0.8494 / 0.2115 / 37.04</b> | 20.24 / 0.5970 / 0.4531 / 132.2        |
|                   |       | LLE      | <b>34.47 / 0.8791 / 0.1482 / 16.35</b> | <b>28.52 / 0.7743 / 0.2997 / 53.96</b> | 29.95 / 0.8537 / 0.1939 / 37.38        | <b>21.54 / 0.6484 / 0.3996 / 94.74</b> |

Table 19: Results of DMPS on FFHQ Dataset.

| Condition         | Steps | Strategy | PSNR↑/SSIM↑/LPIPS↓/FID↓                |                                        |                                        |                                        |
|-------------------|-------|----------|----------------------------------------|----------------------------------------|----------------------------------------|----------------------------------------|
|                   |       |          | Deblur (aniso)                         | Inpainting                             | 4× SR                                  | CS 50%                                 |
| $\sigma_y = 0.05$ | 3     | -        | 5.660 / 0.0054 / 0.9315 / 485.7        | 6.410 / 0.0077 / 0.9335 / 463.5        | 7.510 / 0.0213 / 0.8957 / 450.7        | 5.840 / 0.0057 / 0.9355 / 476.9        |
|                   |       | LLE      | <b>11.80 / 0.0442 / 0.8268 / 409.5</b> | <b>11.88 / 0.0694 / 0.8245 / 418.8</b> | <b>18.14 / 0.2461 / 0.7827 / 308.8</b> | <b>12.30 / 0.0773 / 0.8298 / 407.5</b> |
|                   | 4     | -        | 5.950 / 0.0095 / 0.9224 / 494.1        | 6.450 / 0.0081 / 0.9322 / 470.2        | 8.180 / 0.0281 / 0.9020 / 446.9        | 5.970 / 0.0068 / 0.9337 / 466.8        |
|                   |       | LLE      | <b>12.91 / 0.0801 / 0.8257 / 389.3</b> | <b>12.91 / 0.1051 / 0.8198 / 382.3</b> | <b>21.96 / 0.3962 / 0.6844 / 205.8</b> | <b>13.88 / 0.1231 / 0.7855 / 448.0</b> |
|                   | 5     | -        | 5.830 / 0.0073 / 0.9298 / 531.5        | 6.600 / 0.0085 / 0.9312 / 476.2        | 9.190 / 0.0388 / 0.8984 / 414.6        | 6.000 / 0.0064 / 0.9341 / 472.0        |
|                   |       | LLE      | <b>16.27 / 0.1517 / 0.7504 / 228.4</b> | <b>14.07 / 0.1179 / 0.7970 / 302.9</b> | <b>23.99 / 0.4891 / 0.5609 / 144.3</b> | <b>14.63 / 0.1567 / 0.7579 / 447.3</b> |
|                   | 7     | -        | 5.490 / 0.0059 / 0.9361 / 541.4        | 6.970 / 0.0081 / 0.9295 / 477.6        | 7.860 / 0.0261 / 0.8951 / 422.0        | 6.410 / 0.0065 / 0.9323 / 477.8        |
| $\sigma_y = 0$    |       | LLE      | <b>21.67 / 0.3306 / 0.5881 / 154.9</b> | <b>17.53 / 0.2019 / 0.6933 / 200.8</b> | <b>25.82 / 0.6337 / 0.4328 / 118.8</b> | <b>15.64 / 0.2180 / 0.7044 / 319.8</b> |
|                   | 10    | -        | 24.48 / 0.4699 / 0.4740 / 121.4        | 16.59 / 0.1788 / 0.7164 / 191.2        | <b>26.91 / 0.6953 / 0.3812 / 111.0</b> | 14.84 / 0.1572 / 0.7356 / 299.8        |
|                   |       | LLE      | <b>25.65 / 0.5404 / 0.4420 / 120.0</b> | <b>22.42 / 0.4007 / 0.5249 / 138.4</b> | <b>26.76 / 0.7269 / 0.3353 / 103.6</b> | <b>17.82 / 0.3411 / 0.5819 / 168.2</b> |
|                   | 15    | -        | 27.85 / 0.6932 / 0.3497 / 103.0        | 21.26 / 0.3387 / 0.5683 / 145.5        | <b>27.64 / 0.7774 / 0.2848 / 93.93</b> | 17.87 / 0.2998 / 0.6097 / 176.6        |
|                   |       | LLE      | <b>28.06 / 0.7155 / 0.3350 / 97.64</b> | <b>24.35 / 0.5227 / 0.4523 / 127.4</b> | <b>27.23 / 0.7750 / 0.2776 / 91.17</b> | <b>19.07 / 0.4465 / 0.5091 / 143.7</b> |
|                   | 3     | -        | 6.230 / 0.0137 / 0.9257 / 441.2        | 6.570 / 0.0113 / 0.9262 / 456.9        | 10.84 / 0.0763 / 0.8624 / 398.1        | 6.170 / 0.0098 / 0.9296 / 442.3        |
|                   |       | LLE      | <b>24.92 / 0.5280 / 0.4090 / 100.1</b> | <b>14.17 / 0.1956 / 0.7611 / 286.5</b> | <b>26.68 / 0.7660 / 0.4978 / 177.2</b> | <b>16.21 / 0.3740 / 0.6574 / 467.9</b> |
| $\sigma_y = 0$    | 4     | -        | 5.810 / 0.0094 / 0.9304 / 459.0        | 6.250 / 0.0083 / 0.9307 / 469.5        | 9.370 / 0.0502 / 0.8826 / 412.5        | 5.750 / 0.0067 / 0.9339 / 467.5        |
|                   |       | LLE      | <b>28.11 / 0.6704 / 0.3165 / 82.26</b> | <b>14.64 / 0.2037 / 0.7482 / 262.9</b> | <b>26.79 / 0.7504 / 0.4879 / 160.7</b> | <b>16.30 / 0.3941 / 0.6468 / 456.2</b> |
|                   | 5     | -        | 5.980 / 0.0115 / 0.9278 / 448.9        | 6.430 / 0.0099 / 0.9296 / 465.2        | 10.57 / 0.0689 / 0.8774 / 392.6        | 5.880 / 0.0081 / 0.9318 / 452.3        |
|                   |       | LLE      | <b>29.74 / 0.7381 / 0.2685 / 69.71</b> | <b>15.65 / 0.1917 / 0.7313 / 237.2</b> | <b>27.42 / 0.7107 / 0.3686 / 115.7</b> | <b>16.43 / 0.4118 / 0.6363 / 445.4</b> |
|                   | 7     | -        | 5.340 / 0.0061 / 0.9334 / 469.5        | 6.120 / 0.0065 / 0.9332 / 479.9        | 7.560 / 0.0309 / 0.8844 / 419.6        | 5.300 / 0.0049 / 0.9364 / 474.1        |
|                   |       | LLE      | <b>31.26 / 0.8030 / 0.2222 / 59.25</b> | <b>19.88 / 0.3281 / 0.5953 / 186.2</b> | <b>28.75 / 0.8050 / 0.2893 / 101.2</b> | <b>16.87 / 0.4235 / 0.6077 / 382.0</b> |
|                   | 10    | -        | 26.87 / 0.6778 / 0.3125 / 82.26        | 20.04 / 0.4261 / 0.5654 / 167.7        | 29.15 / 0.8085 / 0.2861 / 98.24        | 17.20 / 0.4539 / 0.5817 / 326.9        |
| $\sigma_y = 0$    |       | LLE      | <b>32.51 / 0.8513 / 0.1805 / 48.60</b> | <b>26.10 / 0.6880 / 0.3809 / 125.5</b> | <b>29.21 / 0.8438 / 0.2383 / 92.21</b> | <b>18.95 / 0.5689 / 0.4871 / 212.6</b> |
|                   | 15    | -        | 32.11 / 0.8338 / 0.1916 / 49.60        | 25.48 / 0.6675 / 0.3957 / 127.1        | <b>29.96 / 0.8549 / 0.2320 / 91.92</b> | 19.52 / 0.5940 / 0.4816 / 214.9        |
|                   |       | LLE      | <b>34.62 / 0.8978 / 0.1398 / 35.35</b> | <b>27.45 / 0.7519 / 0.3360 / 113.8</b> | <b>29.38 / 0.8557 / 0.2116 / 81.28</b> | <b>19.91 / 0.6231 / 0.4397 / 177.4</b> |

Table 20: Results of DPS on CelebA-HQ Dataset.

| Condition         | Steps | Strategy | PSNR↑/SSIM↑/LPIPS↓/FID↓                                     |                                                             |                                                             |                                                             |                                                             |  |
|-------------------|-------|----------|-------------------------------------------------------------|-------------------------------------------------------------|-------------------------------------------------------------|-------------------------------------------------------------|-------------------------------------------------------------|--|
|                   |       |          | Deblur (aniso)                                              | Inpainting                                                  | 4× SR                                                       | CS 50%                                                      | Deblur (nonlinear)                                          |  |
| $\sigma_y = 0.05$ | 3     | -        | 23.59 / 0.6503 / 0.4152 / 79.42                             | 23.57 / 0.5577 / 0.4973 / 85.49                             | <b>25.49</b> / 0.6469 / 0.5276 / 82.53                      | 14.30 / 0.3585 / 0.6364 / 191.8                             | 16.09 / 0.4075 / <b>0.5754</b> / 120.6                      |  |
|                   |       | LLE      | <b>24.59</b> / <b>0.6747</b> / <b>0.4051</b> / <b>73.57</b> | <b>27.51</b> / <b>0.7476</b> / <b>0.3664</b> / <b>60.87</b> | 24.57 / <b>0.6661</b> / <b>0.4650</b> / <b>81.79</b>        | <b>15.83</b> / <b>0.4679</b> / <b>0.5913</b> / <b>183.8</b> | <b>19.06</b> / <b>0.4752</b> / 0.5795 / <b>109.9</b>        |  |
|                   | 4     | -        | 23.35 / 0.6620 / 0.3995 / 63.53                             | 23.19 / 0.5653 / 0.4850 / 81.82                             | 25.21 / 0.6558 / 0.4944 / 73.41                             | 16.01 / 0.4543 / 0.5383 / 135.6                             | 19.27 / 0.5266 / 0.4665 / 88.48                             |  |
|                   |       | LLE      | <b>25.18</b> / <b>0.7063</b> / <b>0.3539</b> / <b>61.87</b> | <b>28.85</b> / <b>0.7830</b> / <b>0.3277</b> / <b>50.67</b> | <b>25.34</b> / <b>0.7196</b> / <b>0.3609</b> / <b>67.81</b> | <b>16.84</b> / <b>0.5018</b> / <b>0.5102</b> / <b>122.7</b> | <b>21.25</b> / <b>0.5796</b> / <b>0.4464</b> / <b>73.48</b> |  |
|                   | 5     | -        | 23.94 / 0.6801 / 0.3695 / 56.70                             | 25.14 / 0.6173 / 0.4342 / 64.64                             | 26.07 / 0.6754 / 0.4698 / 69.38                             | 17.12 / 0.5149 / 0.4811 / 114.4                             | 21.19 / 0.6052 / 0.4060 / 75.86                             |  |
|                   |       | LLE      | <b>25.56</b> / <b>0.7218</b> / <b>0.3264</b> / <b>54.62</b> | <b>27.42</b> / <b>0.7964</b> / <b>0.3035</b> / <b>44.76</b> | <b>26.63</b> / <b>0.7583</b> / <b>0.3148</b> / <b>56.01</b> | <b>17.73</b> / <b>0.5360</b> / <b>0.4681</b> / <b>102.0</b> | <b>22.33</b> / <b>0.6267</b> / <b>0.3930</b> / <b>62.78</b> |  |
|                   | 7     | -        | 24.75 / 0.6989 / 0.3289 / 49.49                             | 27.71 / 0.6985 / 0.3612 / 50.27                             | 27.01 / 0.7020 / 0.4275 / 63.38                             | 17.58 / 0.5470 / 0.4574 / 103.3                             | 22.07 / 0.6282 / 0.3889 / 65.26                             |  |
|                   |       | LLE      | <b>26.32</b> / <b>0.7458</b> / <b>0.2845</b> / <b>48.14</b> | <b>30.49</b> / <b>0.8599</b> / <b>0.2414</b> / <b>42.30</b> | <b>28.48</b> / <b>0.8055</b> / <b>0.2568</b> / <b>45.09</b> | <b>18.87</b> / <b>0.5763</b> / <b>0.4203</b> / <b>83.25</b> | <b>23.24</b> / <b>0.6537</b> / <b>0.3629</b> / <b>55.18</b> |  |
|                   | 10    | -        | 25.69 / 0.7334 / 0.2784 / 46.75                             | 29.90 / 0.7792 / 0.2983 / 42.25                             | 27.70 / 0.7287 / 0.3905 / 61.83                             | 19.09 / 0.6048 / 0.4018 / 84.22                             | 23.74 / 0.6732 / 0.3504 / 57.00                             |  |
|                   |       | LLE      | <b>27.00</b> / <b>0.7653</b> / <b>0.2521</b> / <b>43.98</b> | <b>32.73</b> / <b>0.8985</b> / <b>0.1968</b> / <b>41.88</b> | <b>29.26</b> / <b>0.8253</b> / <b>0.2208</b> / <b>38.15</b> | <b>20.41</b> / <b>0.6322</b> / <b>0.3708</b> / <b>70.17</b> | <b>24.47</b> / <b>0.7024</b> / <b>0.3016</b> / <b>50.39</b> |  |
| $\sigma_y = 0$    | 15    | -        | 26.27 / 0.7508 / 0.2536 / 44.48                             | 30.70 / 0.8109 / 0.2732 / 40.03                             | 27.70 / 0.7285 / 0.3757 / 60.56                             | 19.86 / 0.6506 / 0.3600 / 69.78                             | 24.93 / 0.7026 / 0.3256 / 50.65                             |  |
|                   |       | LLE      | <b>27.25</b> / <b>0.7705</b> / <b>0.2393</b> / <b>42.10</b> | <b>33.73</b> / <b>0.9146</b> / <b>0.1715</b> / <b>38.92</b> | <b>29.32</b> / <b>0.8285</b> / <b>0.2121</b> / <b>38.07</b> | <b>22.46</b> / <b>0.7023</b> / <b>0.3130</b> / <b>56.22</b> | <b>25.75</b> / <b>0.7376</b> / <b>0.2739</b> / <b>46.55</b> |  |
|                   | 3     | -        | 23.61 / 0.6539 / 0.4111 / 83.22                             | 24.60 / 0.6767 / 0.4447 / 90.50                             | 26.91 / 0.7824 / 0.3649 / 77.84                             | 14.30 / 0.3591 / 0.6359 / 191.0                             | 16.09 / 0.4080 / <b>0.5747</b> / 120.7                      |  |
|                   |       | LLE      | <b>24.71</b> / <b>0.6835</b> / <b>0.3941</b> / <b>76.66</b> | <b>28.74</b> / <b>0.8309</b> / <b>0.2991</b> / <b>65.60</b> | <b>27.56</b> / <b>0.7979</b> / <b>0.3576</b> / <b>75.64</b> | <b>15.83</b> / <b>0.4730</b> / <b>0.5889</b> / <b>179.1</b> | <b>19.06</b> / <b>0.4790</b> / 0.5791 / <b>109.9</b>        |  |
|                   | 4     | -        | 23.38 / 0.6657 / 0.3961 / 66.12                             | 24.21 / 0.6925 / 0.4242 / 86.20                             | 26.64 / 0.7946 / 0.3265 / 71.57                             | 16.02 / 0.4548 / 0.5378 / 136.4                             | 19.27 / 0.5271 / 0.4661 / 86.07                             |  |
|                   |       | LLE      | <b>25.30</b> / <b>0.7140</b> / <b>0.3444</b> / <b>64.70</b> | <b>30.52</b> / <b>0.8773</b> / <b>0.2445</b> / <b>55.86</b> | <b>28.49</b> / <b>0.8251</b> / <b>0.2880</b> / <b>71.06</b> | <b>16.84</b> / <b>0.5035</b> / <b>0.5092</b> / <b>123.4</b> | <b>21.26</b> / <b>0.5812</b> / <b>0.4454</b> / <b>74.49</b> |  |
|                   | 5     | -        | 23.97 / 0.6839 / 0.3658 / 59.78                             | 26.95 / 0.7772 / 0.3479 / 67.05                             | 27.95 / 0.8211 / 0.2862 / 65.19                             | 17.12 / 0.5156 / 0.4809 / 115.4                             | 21.19 / 0.6058 / 0.4060 / 76.80                             |  |
|                   |       | LLE      | <b>25.69</b> / <b>0.7288</b> / <b>0.3189</b> / <b>57.10</b> | <b>31.67</b> / <b>0.8971</b> / <b>0.2128</b> / <b>51.23</b> | <b>29.35</b> / <b>0.8436</b> / <b>0.2545</b> / <b>63.48</b> | <b>17.74</b> / <b>0.5377</b> / <b>0.4671</b> / <b>102.9</b> | <b>22.35</b> / <b>0.6284</b> / <b>0.3918</b> / <b>64.21</b> |  |
|                   | 7     | -        | 24.79 / 0.7029 / 0.3260 / 52.98                             | 31.05 / 0.8769 / 0.2296 / 48.50                             | 29.49 / 0.8485 / 0.2339 / 56.48                             | 17.58 / 0.5478 / 0.4574 / 104.4                             | 22.08 / 0.6291 / 0.3886 / 66.33                             |  |
|                   |       | LLE      | <b>26.40</b> / <b>0.7509</b> / <b>0.2800</b> / <b>50.35</b> | <b>33.69</b> / <b>0.9278</b> / <b>0.1539</b> / <b>39.17</b> | <b>30.49</b> / <b>0.8660</b> / <b>0.2114</b> / <b>53.60</b> | <b>18.88</b> / <b>0.5778</b> / <b>0.4201</b> / <b>84.60</b> | <b>23.27</b> / <b>0.6542</b> / <b>0.3637</b> / <b>56.40</b> |  |

Table 21: Results of DPS on FFHQ Dataset.

| Condition         | Steps | Strategy | PSNR↑/SSIM↑/LPIPS↓/FID↓                                     |                                                             |                                                             |                                                             |                                                             |  |
|-------------------|-------|----------|-------------------------------------------------------------|-------------------------------------------------------------|-------------------------------------------------------------|-------------------------------------------------------------|-------------------------------------------------------------|--|
|                   |       |          | Deblur (aniso)                                              | Inpainting                                                  | 4× SR                                                       | CS 50%                                                      | Deblur (nonlinear)                                          |  |
| $\sigma_y = 0.05$ | 3     | -        | 23.41 / 0.6567 / 0.4281 / 151.3                             | 23.93 / 0.6065 / 0.4790 / 157.9                             | <b>24.73</b> / <b>0.6631</b> / 0.4799 / <b>148.1</b>        | 18.20 / 0.5301 / 0.5565 / 337.8                             | 15.75 / 0.4025 / 0.6466 / 233.7                             |  |
|                   |       | LLE      | <b>24.26</b> / <b>0.6759</b> / <b>0.4171</b> / <b>150.0</b> | <b>27.01</b> / <b>0.7421</b> / <b>0.3598</b> / <b>128.7</b> | 24.31 / 0.6600 / <b>0.4634</b> / 153.7                      | <b>18.39</b> / <b>0.5496</b> / <b>0.5349</b> / <b>294.0</b> | <b>16.93</b> / <b>0.4403</b> / <b>0.5900</b> / <b>201.0</b> |  |
|                   | 4     | -        | 22.90 / 0.6481 / 0.4335 / 146.9                             | 21.89 / 0.5513 / 0.5110 / 171.2                             | 25.00 / 0.6832 / 0.4396 / 140.5                             | 17.43 / 0.5086 / 0.5788 / 335.7                             | 18.05 / <b>0.4822</b> / <b>0.5381</b> / 192.5               |  |
|                   |       | LLE      | <b>24.58</b> / <b>0.6950</b> / <b>0.3785</b> / <b>128.8</b> | <b>28.25</b> / <b>0.7736</b> / <b>0.3329</b> / <b>115.8</b> | <b>25.44</b> / <b>0.7046</b> / <b>0.4014</b> / <b>137.1</b> | <b>19.09</b> / <b>0.5936</b> / <b>0.4856</b> / <b>230.1</b> | <b>18.91</b> / <b>0.4653</b> / 0.5512 / <b>182.6</b>        |  |
|                   | 5     | -        | 23.02 / 0.6588 / 0.4184 / 143.2                             | 22.48 / 0.5646 / 0.4943 / 154.3                             | 25.19 / 0.6938 / 0.4260 / 134.0                             | 15.90 / 0.4833 / 0.5971 / 359.3                             | 19.31 / <b>0.5286</b> / <b>0.4871</b> / 164.8               |  |
|                   |       | LLE      | <b>25.01</b> / <b>0.7131</b> / <b>0.3481</b> / <b>111.5</b> | <b>28.47</b> / <b>0.7663</b> / <b>0.3352</b> / <b>112.3</b> | <b>26.31</b> / <b>0.7342</b> / <b>0.3616</b> / <b>130.6</b> | <b>19.34</b> / <b>0.6173</b> / <b>0.4652</b> / <b>205.0</b> | <b>19.70</b> / <b>0.5178</b> / 0.4958 / <b>159.4</b>        |  |
|                   | 7     | -        | 23.31 / 0.6592 / 0.4037 / 146.1                             | 24.04 / 0.5997 / 0.4565 / 143.3                             | 26.35 / 0.7206 / 0.3846 / 124.1                             | 13.85 / 0.4338 / 0.6427 / 386.1                             | 19.60 / 0.5272 / 0.4873 / 157.9                             |  |
|                   |       | LLE      | <b>25.56</b> / <b>0.7333</b> / <b>0.3176</b> / <b>104.3</b> | <b>29.00</b> / <b>0.8294</b> / <b>0.2799</b> / <b>102.4</b> | <b>26.97</b> / <b>0.7731</b> / <b>0.2956</b> / <b>99.94</b> | <b>20.16</b> / <b>0.6774</b> / <b>0.3938</b> / <b>161.7</b> | <b>20.22</b> / <b>0.5453</b> / <b>0.4475</b> / <b>135.3</b> |  |
|                   | 10    | -        | 23.42 / 0.6562 / 0.3561 / 129.7                             | 26.50 / 0.6595 / 0.3877 / 116.8                             | 27.44 / 0.7525 / 0.3367 / 112.8                             | 14.20 / 0.4676 / 0.6003 / 331.8                             | 20.30 / 0.5360 / 0.4628 / 142.3                             |  |
|                   |       | LLE      | <b>26.01</b> / <b>0.7457</b> / <b>0.2910</b> / <b>95.11</b> | <b>31.16</b> / <b>0.8692</b> / <b>0.2331</b> / <b>94.28</b> | <b>27.94</b> / <b>0.8006</b> / <b>0.2631</b> / <b>91.24</b> | <b>20.58</b> / <b>0.7103</b> / <b>0.3541</b> / <b>138.8</b> | <b>21.18</b> / <b>0.5800</b> / <b>0.4011</b> / <b>121.5</b> |  |
| $\sigma_y = 0$    | 15    | -        | 23.72 / 0.6691 / 0.3254 / 116.8                             | 28.94 / 0.7493 / 0.3038 / 90.92                             | 27.72 / 0.7526 / 0.3222 / 104.7                             | 14.20 / 0.5071 / 0.5451 / 280.9                             | 21.00 / 0.5518 / 0.4411 / 132.8                             |  |
|                   |       | LLE      | <b>26.48</b> / <b>0.7594</b> / <b>0.2743</b> / <b>93.22</b> | <b>32.97</b> / <b>0.9029</b> / <b>0.1917</b> / <b>79.57</b> | <b>28.41</b> / <b>0.8133</b> / <b>0.2412</b> / <b>83.82</b> | <b>25.22</b> / <b>0.8189</b> / <b>0.2289</b> / <b>73.91</b> | <b>22.08</b> / <b>0.6109</b> / <b>0.3724</b> / <b>118.0</b> |  |
|                   | 3     | -        | 23.43 / 0.6609 / 0.4228 / 150.7                             | 25.00 / 0.7232 / 0.4174 / 156.1                             | 25.60 / 0.7723 / <b>0.3362</b> / 142.7                      | 18.25 / 0.5509 / 0.5430 / 323.8                             | 15.75 / 0.4032 / 0.6465 / 234.5                             |  |
|                   |       | LLE      | <b>24.40</b> / <b>0.6866</b> / <b>0.4033</b> / <b>145.0</b> | <b>28.40</b> / <b>0.8356</b> / <b>0.2753</b> / <b>122.5</b> | <b>27.12</b> / <b>0.7998</b> / 0.3413 / 143.2               | <b>18.47</b> / <b>0.5673</b> / <b>0.5226</b> / <b>290.6</b> | <b>16.94</b> / <b>0.4403</b> / <b>0.5902</b> / <b>200.8</b> |  |
|                   | 4     | -        | 22.92 / 0.6520 / 0.4306 / 147.1                             | 22.78 / 0.6793 / 0.4437 / 168.0                             | 25.94 / 0.7854 / 0.3132 / 133.1                             | 17.49 / 0.5334 / 0.5652 / 325.7                             | 18.05 / <b>0.4825</b> / <b>0.5378</b> / 193.2               |  |
|                   |       | LLE      | <b>24.70</b> / <b>0.7024</b> / <b>0.3704</b> / <b>129.7</b> | <b>30.19</b> / <b>0.8836</b> / <b>0.2327</b> / <b>106.5</b> | <b>27.81</b> / <b>0.8158</b> / <b>0.2884</b> / <b>128.0</b> | <b>19.16</b> / <b>0.6139</b> / <b>0.4702</b> / <b>237.1</b> | <b>18.92</b> / <b>0.4632</b> / 0.5510 / <b>181.8</b>        |  |
|                   | 5     | -        | 23.05 / 0.6632 / 0.4151 / 143.6                             | 23.72 / 0.7249 / 0.4120 / 158.4                             | 26.25 / 0.8008 / 0.2996 / 125.6                             | 15.94 / 0.5053 / 0.5858 / 345.1                             | 19.32 / <b>0.5292</b> / <b>0.4867</b> / 164.1               |  |
|                   |       | LLE      | <b>25.09</b> / <b>0.7185</b> / <b>0.3434</b> / <b>117.0</b> | <b>30.48</b> / <b>0.8857</b> / <b>0.2382</b> / <b>109.0</b> | <b>28.38</b> / <b>0.8303</b> / <b>0.2551</b> / <b>117.8</b> | <b>19.41</b> / <b>0.6391</b> / <b>0.4487</b> / <b>212.1</b> | <b>19.71</b> / <b>0.5184</b> / 0.4952 / <b>158.4</b>        |  |
|                   | 7     | -        | 23.34 / 0.6642 / 0.4002 / 151.4                             | 26.05 / 0.7897 / 0.3494 / 147.1                             | 27.84 / 0.8310 / 0.2565 / 111.5                             | 13.87 / 0.4492 / 0.6354 / 374.0                             | 19.59 / 0.5276 / 0.4875 / 156.2                             |  |
|                   |       | LLE      | <b>25.63</b> / <b>0.7371</b> / <b>0.3154</b> / <b>110.9</b> | <b>32.08</b> / <b>0.9191</b> / <b>0.1713</b> / <b>80.60</b> | <b>29.15</b> / <b>0.8471</b> / <b>0.2267</b> / <b>102.1</b> | <b>20.25</b> / <b>0.6983</b> / <b>0.3756</b> / <b>165.6</b> | <b>20.22</b> / <b>0.5446</b> / <b>0.4481</b> / <b>136.1</b> |  |

Table 22: Results of RED-diff on CelebA-HQ Dataset.

| Condition         | Steps | Strategy                                                    | PSNR↑/SSIM↑/LPIPS↓/FID↓                                     |                                                             |                                                             |                                                             |                                                             |  |
|-------------------|-------|-------------------------------------------------------------|-------------------------------------------------------------|-------------------------------------------------------------|-------------------------------------------------------------|-------------------------------------------------------------|-------------------------------------------------------------|--|
|                   |       |                                                             | Deblur (aniso)                                              | Inpainting                                                  | 4× SR                                                       | CS 50%                                                      | Deblur (nonlinear)                                          |  |
| $\sigma_y = 0.05$ | 3     | -                                                           | 24.91 / 0.7020 / 0.3727 / 53.55                             | 18.93 / 0.3496 / 0.6153 / 122.3                             | 25.45 / 0.5728 / 0.5665 / 69.08                             | 16.98 / 0.4082 / 0.5908 / 266.6                             | 18.81 / 0.3511 / 0.6530 / 111.6                             |  |
|                   |       | LLE                                                         | <b>25.27</b> / <b>0.7110</b> / <b>0.3515</b> / <b>46.47</b> | <b>24.40</b> / <b>0.6222</b> / <b>0.4106</b> / <b>63.43</b> | <b>26.92</b> / <b>0.7710</b> / <b>0.2703</b> / <b>41.64</b> | <b>17.00</b> / <b>0.5211</b> / <b>0.4664</b> / <b>93.87</b> | <b>20.31</b> / <b>0.3813</b> / <b>0.6102</b> / <b>95.67</b> |  |
|                   | 4     | -                                                           | 25.59 / 0.7146 / 0.3505 / 45.34                             | 18.73 / 0.3521 / 0.6220 / 132.2                             | 24.76 / 0.5410 / 0.5874 / 79.01                             | 17.45 / 0.4266 / 0.5968 / 266.3                             | 19.52 / 0.3646 / 0.6271 / 103.8                             |  |
|                   |       | LLE                                                         | <b>25.80</b> / <b>0.7206</b> / <b>0.3375</b> / <b>42.15</b> | <b>23.33</b> / <b>0.6181</b> / <b>0.4289</b> / <b>77.52</b> | <b>24.81</b> / <b>0.7206</b> / <b>0.3238</b> / <b>53.77</b> | <b>17.73</b> / <b>0.5207</b> / <b>0.4832</b> / <b>124.9</b> | <b>21.19</b> / <b>0.4552</b> / <b>0.5668</b> / <b>89.76</b> |  |
|                   | 5     | -                                                           | 25.99 / 0.7241 / 0.3336 / 41.90                             | 22.17 / 0.4567 / 0.5074 / 83.30                             | <b>25.41</b> / 0.5734 / 0.5463 / 66.85                      | 18.17 / 0.4464 / 0.5415 / 179.6                             | 20.37 / 0.3998 / 0.5941 / 97.28                             |  |
|                   |       | LLE                                                         | <b>26.06</b> / <b>0.7259</b> / <b>0.3180</b> / <b>37.92</b> | <b>24.86</b> / <b>0.7163</b> / <b>0.3309</b> / <b>43.72</b> | <b>23.61</b> / <b>0.6895</b> / <b>0.3530</b> / <b>62.67</b> | <b>18.90</b> / <b>0.5882</b> / <b>0.3975</b> / <b>53.25</b> | <b>21.06</b> / <b>0.4977</b> / <b>0.5462</b> / <b>93.23</b> |  |
|                   | 7     | -                                                           | 26.50 / <b>0.7384</b> / 0.3120 / 37.92                      | 23.24 / 0.5165 / 0.4824 / 79.25                             | <b>25.18</b> / <b>0.5595</b> / 0.5484 / 68.63               | 19.43 / 0.4864 / 0.5262 / 154.1                             | 21.30 / 0.4361 / 0.5651 / 91.58                             |  |
|                   |       | LLE                                                         | <b>26.52</b> / <b>0.7368</b> / <b>0.2982</b> / <b>35.04</b> | <b>25.77</b> / <b>0.7371</b> / <b>0.3199</b> / <b>46.47</b> | <b>24.77</b> / <b>0.7054</b> / <b>0.3480</b> / <b>56.32</b> | <b>20.28</b> / <b>0.6306</b> / <b>0.3726</b> / <b>55.38</b> | <b>21.54</b> / <b>0.5216</b> / <b>0.5248</b> / <b>95.53</b> |  |
|                   | 10    | -                                                           | <b>27.02</b> / <b>0.7519</b> / 0.2959 / 34.53               | 25.63 / 0.5983 / 0.4141 / 61.83                             | <b>25.36</b> / 0.5674 / 0.5298 / <b>65.69</b>               | <b>20.38</b> / <b>0.6234</b> / 0.4810 / 116.1               | <b>21.46</b> / <b>0.4618</b> / 0.5451 / 91.58               |  |
|                   |       | LLE                                                         | <b>26.59</b> / <b>0.7474</b> / <b>0.2682</b> / <b>32.28</b> | <b>23.63</b> / <b>0.7547</b> / <b>0.3030</b> / <b>43.30</b> | <b>23.85</b> / <b>0.6893</b> / <b>0.3602</b> / <b>66.63</b> | <b>21.15</b> / <b>0.6660</b> / <b>0.3413</b> / <b>43.09</b> | <b>22.77</b> / <b>0.5670</b> / <b>0.4787</b> / <b>80.82</b> |  |
| 15                | -     | <b>27.53</b> / <b>0.7638</b> / 0.2849 / 34.36               | 26.80 / 0.6203 / 0.3756 / 50.52                             | <b>25.51</b> / 0.5748 / 0.5128 / <b>63.57</b>               | <b>21.66</b> / <b>0.5449</b> / 0.4384 / 81.89               | <b>23.44</b> / <b>0.4773</b> / <b>0.5237</b> / <b>86.46</b> |                                                             |  |
|                   | LLE   | <b>27.16</b> / <b>0.7614</b> / <b>0.2567</b> / <b>30.89</b> | <b>24.81</b> / <b>0.7963</b> / <b>0.2646</b> / <b>36.14</b> | <b>24.61</b> / <b>0.7009</b> / <b>0.3726</b> / <b>65.55</b> | <b>21.18</b> / <b>0.6587</b> / <b>0.3453</b> / <b>47.16</b> | <b>24.24</b> / <b>0.6317</b> / <b>0.4330</b> / <b>75.50</b> |                                                             |  |
| $\sigma_y = 0$    | 3     | -                                                           | 25.05 / 0.7282 / 0.3388 / 77.93                             | 19.37 / 0.4125 / 0.6027 / 138.7                             | 29.88 / 0.8563 / 0.2708 / 69.79                             | 17.28 / 0.5166 / 0.5589 / 252.0                             | 19.93 / 0.3836 / 0.6507 / 113.9                             |  |
|                   |       | LLE                                                         | <b>25.68</b> / <b>0.7443</b> / <b>0.3223</b> / <b>63.79</b> | <b>26.23</b> / <b>0.7233</b> / <b>0.3804</b> / <b>79.06</b> | <b>29.97</b> / <b>0.8575</b> / <b>0.2262</b> / <b>60.37</b> | <b>17.37</b> / <b>0.5500</b> / <b>0.4876</b> / <b>163.3</b> | <b>20.50</b> / <b>0.4173</b> / <b>0.6010</b> / <b>99.22</b> |  |
|                   | 4     | -                                                           | 25.76 / 0.7426 / 0.3171 / 63.24                             | 19.09 / 0.4163 / 0.6047 / 143.6                             | 29.22 / 0.8428 / 0.2986 / 77.49                             | 17.70 / 0.5127 / 0.5635 / 234.4                             | 19.79 / 0.4089 / 0.6222 / 108.2                             |  |
|                   |       | LLE                                                         | <b>26.21</b> / <b>0.7543</b> / <b>0.3037</b> / <b>57.36</b> | <b>24.45</b> / <b>0.7210</b> / <b>0.4007</b> / <b>96.56</b> | <b>29.34</b> / <b>0.8464</b> / <b>0.2388</b> / <b>65.65</b> | <b>18.39</b> / <b>0.5508</b> / <b>0.5164</b> / <b>178.9</b> | <b>21.50</b> / <b>0.4108</b> / <b>0.5995</b> / <b>93.50</b> |  |
|                   | 5     | -                                                           | 26.17 / 0.7527 / 0.2997 / 57.66                             | 21.66 / 0.5778 / 0.4736 / 94.36                             | 29.89 / 0.8570 / 0.2477 / 65.75                             | 18.25 / 0.5730 / 0.5075 / 187.9                             | 20.48 / 0.4436 / 0.5920 / 102.5                             |  |
|                   |       | LLE                                                         | <b>26.49</b> / <b>0.7603</b> / <b>0.2879</b> / <b>51.68</b> | <b>26.87</b> / <b>0.8064</b> / <b>0.3178</b> / <b>90.36</b> | <b>30.03</b> / <b>0.8569</b> / <b>0.2155</b> / <b>58.20</b> | <b>19.58</b> / <b>0.6171</b> / <b>0.3877</b> / <b>76.21</b> | <b>21.02</b> / <b>0.5293</b> / <b>0.5538</b> / <b>98.71</b> |  |
|                   | 7     | -                                                           | 26.71 / 0.7681 / 0.2766 / 51.51                             | 24.25 / 0.6456 / 0.4443 / 89.15                             | 30.18 / 0.8582 / 0.2392 / 60.73                             | 19.84 / 0.5933 / 0.4933 / 161.6                             | 21.60 / 0.4936 / 0.5571 / 101.7                             |  |
|                   |       | LLE                                                         | <b>26.86</b> / <b>0.7700</b> / <b>0.2669</b> / <b>47.85</b> | <b>28.00</b> / <b>0.8061</b> / <b>0.2863</b> / <b>73.61</b> | <b>30.31</b> / <b>0.8626</b> / <b>0.1995</b> / <b>52.55</b> | <b>20.79</b> / <b>0.6739</b> / <b>0.3387</b> / <b>61.20</b> | <b>21.52</b> / <b>0.5343</b> / <b>0.5502</b> / <b>102.5</b> |  |
|                   | 10    | -                                                           | 26.27 / <b>0.7822</b> / 0.2603 / 48.26                      | 27.46 / 0.7696 / 0.3436 / 73.03                             | 30.70 / 0.8689 / 0.2108 / 53.54                             | 20.90 / 0.6469 / 0.4384 / 128.1                             | 21.32 / 0.5220 / 0.5350 / 98.95                             |  |
|                   |       | LLE                                                         | <b>27.23</b> / <b>0.8181</b> / <b>0.2508</b> / <b>44.87</b> | <b>27.78</b> / <b>0.8734</b> / <b>0.3286</b> / <b>62.03</b> | <b>30.82</b> / <b>0.8711</b> / <b>0.1860</b> / <b>47.76</b> | <b>20.69</b> / <b>0.6482</b> / <b>0.4149</b> / <b>56.38</b> | <b>22.23</b> / <b>0.6270</b> / <b>0.4790</b> / <b>91.95</b> |  |
| 15                | -     | <b>27.82</b> / <b>0.7947</b> / 0.2494 / 46.16               | 29.45 / 0.8043 / 0.2929 / 55.89                             | <b>31.13</b> / 0.8756 / 0.1921 / <b>44.43</b>               | 22.44 / 0.6836 / 0.3832 / 92.37                             | 22.54 / 0.5430 / 0.5141 / 94.05                             |                                                             |  |
|                   | LLE   | <b>27.79</b> / <b>0.7912</b> / <b>0.2404</b> / <b>43.11</b> | <b>31.47</b> / <b>0.9002</b> / <b>0.1967</b> / <b>45.80</b> | <b>31.09</b> / <b>0.8765</b> / <b>0.1805</b> / <b>45.48</b> | <b>23.75</b> / <b>0.6676</b> / <b>0.2718</b> / <b>46.32</b> | <b>24.71</b> / <b>0.6040</b> / <b>0.4136</b> / <b>70.95</b> |                                                             |  |

Table 23: Results of RED-diff on FFHQ Dataset.

| Condition         | Steps | Strategy | PSNR/SSIM/LPIPS/FID↓                                        |                                                             |                                                             |                                                             |                                                             |
|-------------------|-------|----------|-------------------------------------------------------------|-------------------------------------------------------------|-------------------------------------------------------------|-------------------------------------------------------------|-------------------------------------------------------------|
|                   |       |          | Deblur (aniso)                                              | Inpainting                                                  | 4× SR                                                       | CS 50%                                                      | Deblur (nonlinear)                                          |
| $\sigma_y = 0.05$ | 3     | -        | 25.18 / 0.6954 / 0.3956 / 117.8                             | 18.01 / 0.3596 / 0.6404 / 191.9                             | 24.96 / 0.5636 / 0.5784 / 143.8                             | 16.88 / 0.4098 / 0.6067 / 352.1                             | 15.86 / 0.1890 / 0.7677 / 280.0                             |
|                   |       | LLE      | <b>25.20</b> / 0.6942 / <b>0.3931</b> / <b>115.6</b>        | <b>23.64</b> / <b>0.5499</b> / <b>0.4579</b> / <b>140.2</b> | <b>25.63</b> / <b>0.7370</b> / <b>0.3078</b> / <b>100.6</b> | <b>17.06</b> / <b>0.5046</b> / <b>0.5350</b> / <b>242.6</b> | <b>16.61</b> / <b>0.2230</b> / <b>0.7453</b> / <b>268.5</b> |
|                   | 4     | -        | 25.60 / 0.7007 / 0.3871 / 112.7                             | 18.43 / 0.3542 / 0.6352 / 198.2                             | <b>24.23</b> / 0.5267 / 0.6176 / 162.2                      | 17.02 / 0.4085 / 0.6192 / 365.3                             | 16.30 / 0.1992 / 0.7538 / <b>252.2</b>                      |
|                   |       | LLE      | <b>25.65</b> / <b>0.7055</b> / <b>0.3819</b> / <b>109.8</b> | <b>22.56</b> / <b>0.5984</b> / <b>0.4585</b> / <b>164.1</b> | 23.99 / <b>0.6948</b> / <b>0.3631</b> / <b>126.4</b>        | <b>17.47</b> / <b>0.4978</b> / <b>0.5433</b> / <b>229.6</b> | <b>16.55</b> / <b>0.2403</b> / <b>0.7412</b> / <b>268.0</b> |
|                   | 5     | -        | <b>25.94</b> / 0.7098 / 0.3768 / 108.3                      | 20.44 / 0.4367 / 0.5656 / 172.3                             | <b>24.90</b> / 0.5621 / 0.5675 / 138.9                      | 17.72 / 0.4386 / 0.5682 / 275.6                             | 17.64 / 0.2603 / 0.7087 / 228.4                             |
|                   |       | LLE      | <b>25.91</b> / <b>0.7111</b> / <b>0.3748</b> / <b>107.0</b> | <b>23.85</b> / <b>0.6701</b> / <b>0.4017</b> / <b>133.5</b> | 23.11 / <b>0.6701</b> / <b>0.3983</b> / <b>137.6</b>        | <b>18.44</b> / <b>0.5815</b> / <b>0.4290</b> / <b>130.2</b> | <b>18.35</b> / <b>0.3275</b> / <b>0.6821</b> / <b>217.5</b> |
|                   | 7     | -        | <b>26.26</b> / 0.7164 / 0.3708 / 107.0                      | 22.02 / 0.4873 / 0.5188 / 158.1                             | <b>24.67</b> / 0.5456 / 0.5801 / 145.1                      | 18.31 / 0.4563 / 0.5634 / 254.3                             | 18.60 / 0.3010 / 0.6801 / 222.0                             |
|                   |       | LLE      | <b>25.81</b> / <b>0.7275</b> / <b>0.3450</b> / <b>100.2</b> | <b>24.87</b> / <b>0.6883</b> / <b>0.3890</b> / <b>129.2</b> | 24.00 / <b>0.6873</b> / <b>0.3770</b> / <b>128.2</b>        | <b>19.23</b> / <b>0.6104</b> / <b>0.4185</b> / <b>131.5</b> | <b>19.32</b> / <b>0.4085</b> / <b>0.6317</b> / <b>210.8</b> |
|                   | 10    | -        | <b>26.61</b> / 0.7262 / 0.3606 / 104.5                      | 24.22 / 0.5665 / 0.4519 / 136.2                             | <b>24.85</b> / 0.5540 / 0.5596 / 140.1                      | 19.00 / 0.4880 / 0.5220 / 202.5                             | 19.26 / 0.3303 / 0.6572 / 217.1                             |
|                   |       | LLE      | <b>26.27</b> / <b>0.7409</b> / <b>0.3313</b> / <b>95.36</b> | <b>25.85</b> / <b>0.7361</b> / <b>0.3499</b> / <b>117.4</b> | 23.38 / <b>0.6745</b> / <b>0.3888</b> / <b>134.2</b>        | <b>20.08</b> / <b>0.6384</b> / <b>0.3973</b> / <b>123.5</b> | <b>20.89</b> / <b>0.4905</b> / <b>0.5779</b> / <b>194.7</b> |
| $\sigma_y = 0$    | 15    | -        | <b>26.96</b> / 0.7257 / 0.3612 / 105.5                      | 26.21 / 0.6343 / 0.3939 / 115.5                             | <b>25.03</b> / 0.5635 / 0.5367 / <b>131.6</b>               | 20.26 / 0.5126 / 0.4793 / 158.5                             | 20.05 / 0.3619 / 0.6336 / 208.1                             |
|                   |       | LLE      | <b>26.77</b> / <b>0.7560</b> / <b>0.3169</b> / <b>93.77</b> | <b>27.27</b> / <b>0.7637</b> / <b>0.3221</b> / <b>106.3</b> | 23.75 / <b>0.6795</b> / <b>0.4021</b> / 136.7               | <b>21.37</b> / <b>0.6884</b> / <b>0.3546</b> / <b>107.0</b> | <b>21.75</b> / <b>0.5402</b> / <b>0.5348</b> / <b>181.8</b> |
|                   | 3     | -        | 25.49 / 0.7478 / <b>0.3323</b> / 122.4                      | 18.24 / 0.4060 / 0.6313 / 200.9                             | <b>29.00</b> / <b>0.8458</b> / 0.2976 / 124.6               | 17.17 / 0.5166 / 0.5716 / 334.8                             | 15.96 / 0.2022 / 0.7660 / 290.4                             |
|                   |       | LLE      | <b>25.66</b> / <b>0.7514</b> / 0.3324 / <b>121.3</b>        | <b>24.57</b> / <b>0.6405</b> / <b>0.4262</b> / <b>143.1</b> | 28.80 / 0.8413 / <b>0.2477</b> / <b>113.4</b>               | <b>17.38</b> / <b>0.5313</b> / <b>0.5453</b> / <b>296.6</b> | <b>16.71</b> / <b>0.2406</b> / <b>0.7440</b> / <b>274.5</b> |
|                   | 4     | -        | 25.97 / 0.7571 / 0.3175 / 114.7                             | 18.74 / 0.4168 / 0.6232 / 206.0                             | 28.39 / 0.8306 / 0.3580 / 141.0                             | 17.29 / 0.5015 / 0.5875 / 339.4                             | 16.28 / 0.2148 / 0.7534 / <b>249.9</b>                      |
|                   |       | LLE      | <b>26.13</b> / <b>0.7618</b> / <b>0.3148</b> / <b>111.8</b> | <b>23.52</b> / <b>0.6709</b> / <b>0.4502</b> / <b>167.3</b> | <b>29.29</b> / <b>0.8506</b> / <b>0.2320</b> / <b>106.3</b> | <b>17.93</b> / <b>0.5311</b> / <b>0.5562</b> / <b>278.3</b> | <b>16.59</b> / <b>0.2533</b> / <b>0.7414</b> / <b>270.9</b> |
|                   | 5     | -        | 26.33 / 0.7663 / 0.3075 / <b>107.0</b>                      | 20.86 / 0.5118 / 0.5480 / 180.4                             | <b>29.12</b> / <b>0.8475</b> / 0.2810 / 121.8               | 18.08 / 0.5589 / 0.5305 / 284.6                             | 17.79 / 0.2863 / 0.7059 / 227.6                             |
|                   |       | LLE      | <b>26.38</b> / <b>0.7678</b> / <b>0.3068</b> / 107.5        | <b>25.15</b> / <b>0.7447</b> / <b>0.3889</b> / <b>147.3</b> | 28.26 / 0.8277 / <b>0.2497</b> / <b>112.8</b>               | <b>18.70</b> / <b>0.6081</b> / <b>0.4232</b> / <b>154.2</b> | <b>18.29</b> / <b>0.3438</b> / <b>0.6848</b> / <b>223.4</b> |
|                   | 7     | -        | 26.69 / 0.7743 / 0.2975 / <b>99.61</b>                      | 22.73 / 0.6013 / 0.4893 / 164.2                             | <b>29.33</b> / <b>0.8485</b> / 0.2855 / 118.7               | 18.69 / 0.5699 / 0.5293 / 260.7                             | 18.82 / 0.3308 / 0.6791 / 228.5                             |
|                   |       | LLE      | <b>26.81</b> / <b>0.7798</b> / <b>0.2913</b> / 101.7        | <b>26.24</b> / <b>0.7773</b> / <b>0.3677</b> / <b>142.9</b> | 28.90 / 0.8407 / <b>0.2231</b> / <b>95.31</b>               | <b>19.74</b> / <b>0.6544</b> / <b>0.3948</b> / <b>146.4</b> | <b>19.02</b> / <b>0.4136</b> / <b>0.6400</b> / <b>217.4</b> |

Table 24: Results of DiffPIR on CelebA-HQ Dataset.

| Condition         | Steps | Strategy | PSNR/SSIM/LPIPS/FID↓                                        |                                                             |                                                             |                                                             |                                                             |
|-------------------|-------|----------|-------------------------------------------------------------|-------------------------------------------------------------|-------------------------------------------------------------|-------------------------------------------------------------|-------------------------------------------------------------|
|                   |       |          | Deblur (aniso)                                              | Inpainting                                                  | 4× SR                                                       | CS 50%                                                      | Deblur (nonlinear)                                          |
| $\sigma_y = 0.05$ | 3     | -        | <b>23.06</b> / <b>0.3875</b> / <b>0.5373</b> / <b>84.09</b> | 18.66 / 0.3550 / 0.6248 / 126.3                             | 26.48 / 0.6443 / 0.4647 / 58.25                             | 17.47 / 0.4416 / 0.5813 / 253.7                             | 21.69 / 0.3931 / 0.5513 / <b>65.90</b>                      |
|                   |       | LLE      | 22.81 / 0.3754 / 0.5532 / 90.45                             | <b>24.53</b> / <b>0.5645</b> / <b>0.4472</b> / <b>70.36</b> | <b>26.84</b> / <b>0.7231</b> / <b>0.3447</b> / <b>44.71</b> | <b>17.82</b> / <b>0.4474</b> / <b>0.5642</b> / <b>210.1</b> | <b>21.70</b> / <b>0.4024</b> / <b>0.5464</b> / 66.11        |
|                   | 4     | -        | 25.62 / 0.5245 / 0.4300 / 57.67                             | 21.93 / 0.4746 / 0.5143 / 85.17                             | <b>27.65</b> / 0.7250 / 0.3563 / 48.26                      | 18.14 / 0.4835 / 0.5340 / 185.7                             | <b>23.48</b> / <b>0.4632</b> / <b>0.4970</b> / <b>59.23</b> |
|                   |       | LLE      | <b>26.71</b> / <b>0.6029</b> / <b>0.3949</b> / <b>54.77</b> | <b>25.97</b> / <b>0.6365</b> / <b>0.3924</b> / <b>57.75</b> | 27.59 / <b>0.7860</b> / <b>0.2525</b> / <b>37.77</b>        | <b>18.71</b> / <b>0.4987</b> / <b>0.5061</b> / <b>141.5</b> | 23.28 / 0.4612 / 0.4997 / 59.95                             |
|                   | 5     | -        | 27.17 / 0.6260 / 0.3578 / 45.61                             | 24.25 / 0.5692 / 0.4362 / 65.81                             | <b>28.06</b> / 0.7655 / 0.2945 / 39.96                      | 18.67 / 0.5151 / 0.4957 / 143.0                             | <b>24.56</b> / 0.5131 / <b>0.4593</b> / <b>55.37</b>        |
|                   |       | LLE      | <b>28.42</b> / <b>0.7437</b> / <b>0.2910</b> / <b>34.35</b> | <b>27.31</b> / <b>0.6958</b> / <b>0.3431</b> / <b>46.98</b> | <b>27.63</b> / <b>0.7879</b> / <b>0.2439</b> / <b>37.90</b> | <b>19.35</b> / <b>0.5484</b> / <b>0.4540</b> / <b>104.4</b> | <b>24.47</b> / <b>0.5157</b> / <b>0.4603</b> / <b>56.22</b> |
|                   | 7     | -        | 28.50 / 0.7384 / 0.2737 / 31.81                             | 27.27 / 0.6999 / 0.3385 / 46.75                             | <b>28.17</b> / <b>0.7932</b> / 0.2462 / <b>34.03</b>        | 20.00 / 0.5776 / 0.4262 / 93.28                             | 25.83 / 0.5841 / 0.4046 / 48.87                             |
|                   |       | LLE      | <b>28.69</b> / <b>0.7914</b> / <b>0.2309</b> / <b>27.58</b> | <b>28.55</b> / <b>0.7626</b> / <b>0.2883</b> / <b>37.34</b> | 27.47 / 0.7848 / <b>0.2389</b> / 39.92                      | <b>20.69</b> / <b>0.6287</b> / <b>0.3731</b> / <b>62.78</b> | <b>26.11</b> / <b>0.6064</b> / <b>0.3947</b> / <b>48.49</b> |
|                   | 10    | -        | <b>29.01</b> / 0.7937 / 0.2262 / <b>25.21</b>               | 28.85 / 0.7693 / 0.2793 / 36.39                             | <b>28.08</b> / <b>0.7978</b> / <b>0.2329</b> / <b>36.90</b> | 20.69 / 0.6361 / 0.3692 / 67.68                             | 27.14 / 0.6632 / 0.3446 / 41.48                             |
|                   |       | LLE      | 28.68 / <b>0.7998</b> / <b>0.2175</b> / 32.83               | <b>29.47</b> / <b>0.8174</b> / <b>0.2365</b> / <b>29.25</b> | 27.33 / 0.7798 / 0.2421 / 40.84                             | <b>21.41</b> / <b>0.6874</b> / <b>0.3153</b> / <b>43.70</b> | <b>27.44</b> / <b>0.6949</b> / <b>0.3271</b> / <b>38.61</b> |
| $\sigma_y = 0$    | 15    | -        | <b>29.03</b> / <b>0.8094</b> / <b>0.2098</b> / <b>32.92</b> | <b>30.19</b> / 0.8328 / 0.2199 / 26.73                      | <b>27.89</b> / <b>0.7941</b> / <b>0.2354</b> / 42.00        | 22.02 / 0.7085 / 0.3010 / 43.44                             | 28.21 / 0.7474 / 0.2743 / 30.64                             |
|                   |       | LLE      | 28.47 / 0.7978 / 0.2190 / 39.10                             | 30.07 / <b>0.8494</b> / <b>0.1969</b> / 25.11               | 27.30 / 0.7791 / 0.2452 / <b>41.51</b>                      | <b>22.91</b> / <b>0.7407</b> / <b>0.2673</b> / <b>35.31</b> | <b>28.34</b> / <b>0.7689</b> / <b>0.2616</b> / <b>27.66</b> |
|                   | 3     | -        | 28.29 / 0.7936 / 0.2392 / 32.79                             | 18.99 / 0.4032 / 0.6115 / 144.1                             | 30.05 / 0.8580 / 0.2513 / 62.85                             | 17.50 / <b>0.4528</b> / <b>0.6015</b> / 276.6               | 24.05 / 0.5484 / 0.4729 / 61.26                             |
|                   |       | LLE      | <b>33.05</b> / <b>0.8750</b> / <b>0.1967</b> / <b>24.81</b> | <b>25.85</b> / <b>0.7013</b> / <b>0.3956</b> / <b>79.35</b> | <b>30.10</b> / <b>0.8587</b> / <b>0.2395</b> / <b>59.83</b> | 17.67 / 0.4462 / 0.6018 / 273.9                             | <b>24.73</b> / <b>0.6333</b> / <b>0.4279</b> / <b>51.54</b> |
|                   | 4     | -        | 32.47 / 0.8373 / 0.2101 / 25.49                             | 22.66 / 0.5476 / 0.4910 / 100.4                             | <b>30.58</b> / <b>0.8701</b> / 0.2160 / 55.17               | 18.09 / <b>0.4795</b> / 0.5667 / 217.5                      | 25.60 / 0.5398 / 0.4392 / 56.03                             |
|                   |       | LLE      | <b>34.23</b> / <b>0.9104</b> / <b>0.1674</b> / <b>22.43</b> | <b>27.90</b> / <b>0.8067</b> / <b>0.3217</b> / <b>72.44</b> | 30.53 / 0.8676 / <b>0.2051</b> / <b>50.57</b>               | <b>18.30</b> / 0.4714 / <b>0.5650</b> / <b>204.8</b>        | <b>26.61</b> / <b>0.7073</b> / <b>0.3793</b> / <b>44.29</b> |
|                   | 5     | -        | 32.49 / 0.8360 / 0.2087 / 24.44                             | 25.49 / 0.6656 / 0.4030 / 79.67                             | <b>30.76</b> / <b>0.8735</b> / 0.2002 / 50.05               | 18.55 / <b>0.5004</b> / 0.5411 / 184.4                      | 26.41 / 0.6302 / 0.4182 / 53.55                             |
|                   |       | LLE      | <b>34.33</b> / <b>0.9131</b> / <b>0.1655</b> / <b>22.88</b> | <b>29.48</b> / <b>0.8545</b> / <b>0.2678</b> / <b>63.57</b> | 30.67 / 0.8704 / <b>0.1901</b> / <b>45.68</b>               | <b>18.81</b> / 0.4921 / <b>0.5352</b> / <b>168.5</b>        | <b>27.77</b> / <b>0.7494</b> / <b>0.3503</b> / <b>39.87</b> |
|                   | 7     | -        | 32.49 / 0.8340 / 0.2068 / 23.52                             | 29.46 / 0.8375 / 0.2768 / 60.15                             | <b>30.95</b> / <b>0.8769</b> / 0.1824 / 43.58               | 19.65 / <b>0.5385</b> / 0.4978 / 147.6                      | 27.02 / 0.6538 / 0.4001 / 50.66                             |
|                   |       | LLE      | <b>34.60</b> / <b>0.9158</b> / <b>0.1613</b> / <b>22.25</b> | <b>31.18</b> / <b>0.8934</b> / <b>0.2098</b> / <b>50.47</b> | 30.77 / 0.8726 / <b>0.1740</b> / <b>40.27</b>               | <b>19.91</b> / 0.5351 / <b>0.4859</b> / <b>129.2</b>        | <b>29.20</b> / <b>0.8059</b> / <b>0.3067</b> / <b>34.06</b> |

Table 25: Results of DiffPIR on FFHQ Dataset.

| Condition         | Steps | Strategy                               | PSNR/SSIM/LPIPS/FID↓                   |                                        |                                        |                                        |                                        |
|-------------------|-------|----------------------------------------|----------------------------------------|----------------------------------------|----------------------------------------|----------------------------------------|----------------------------------------|
|                   |       |                                        | Deblur (aniso)                         | Inpainting                             | 4× SR                                  | CS 50%                                 | Deblur (nonlinear)                     |
| $\sigma_y = 0.05$ | 3     | -                                      | <b>22.29 / 0.3639 / 0.5628 / 150.2</b> | 18.62 / 0.3515 / 0.6316 / 183.4        | 25.49 / 0.5982 / 0.5035 / 131.1        | 17.01 / 0.4126 / 0.6137 / 360.1        | <b>19.28 / 0.3002 / 0.6489 / 166.5</b> |
|                   |       | LLE                                    | 22.16 / 0.3558 / 0.5783 / 156.3        | <b>23.33 / 0.4981 / 0.4854 / 140.1</b> | <b>25.75 / 0.6750 / 0.4029 / 113.9</b> | <b>17.28 / 0.4151 / 0.5980 / 305.2</b> | 19.13 / 0.3002 / <b>0.6461 / 166.3</b> |
|                   | 4     | -                                      | 24.22 / 0.4610 / 0.4778 / 121.7        | 21.47 / 0.4555 / 0.5368 / 153.6        | <b>26.57 / 0.6877 / 0.3921 / 109.9</b> | 17.31 / 0.4469 / 0.5729 / 292.2        | <b>20.30 / 0.3547 / 0.5972 / 149.6</b> |
|                   |       | LLE                                    | <b>25.63 / 0.5569 / 0.4323 / 121.1</b> | <b>24.70 / 0.5744 / 0.4353 / 131.0</b> | <b>26.37 / 0.7470 / 0.2974 / 91.33</b> | <b>17.75 / 0.4514 / 0.5551 / 244.5</b> | 20.26 / 0.3502 / 0.5987 / 154.1        |
|                   | 5     | -                                      | 25.64 / 0.5484 / 0.4153 / 109.4        | 23.41 / 0.5333 / 0.4716 / 136.0        | <b>26.92 / 0.7306 / 0.3331 / 98.21</b> | 17.86 / 0.4772 / 0.5371 / 243.1        | <b>21.27 / 0.4055 / 0.5504 / 141.3</b> |
|                   |       | LLE                                    | <b>26.70 / 0.6520 / 0.3705 / 106.6</b> | <b>25.74 / 0.6244 / 0.3986 / 115.5</b> | 26.41 / <b>0.7549 / 0.2850 / 89.33</b> | <b>18.37 / 0.4905 / 0.5101 / 201.2</b> | 21.17 / 0.3961 / 0.5585 / 142.4        |
|                   | 7     | -                                      | 27.10 / 0.6608 / 0.3436 / 93.54        | 25.98 / 0.6488 / 0.3851 / 112.9        | <b>27.04 / 0.7624 / 0.2826 / 86.07</b> | 18.69 / 0.5282 / 0.4828 / 188.7        | <b>22.71 / 0.4837 / 0.4768 / 129.9</b> |
|                   |       | LLE                                    | <b>27.63 / 0.7511 / 0.2948 / 84.04</b> | <b>27.05 / 0.6972 / 0.3488 / 101.7</b> | 26.26 / 0.7547 / <b>0.2788 / 91.59</b> | <b>19.15 / 0.5522 / 0.4485 / 161.9</b> | 22.55 / <b>0.4844 / 0.4804 / 128.7</b> |
|                   | 10    | -                                      | <b>27.98 / 0.7499 / 0.2845 / 81.92</b> | <b>28.47 / 0.7227 / 0.3408 / 98.12</b> | <b>26.94 / 0.7701 / 0.2707 / 83.40</b> | 19.13 / 0.5834 / 0.4246 / 158.4        | <b>23.53 / 0.5524 / 0.4124 / 119.3</b> |
|                   |       | LLE                                    | <b>27.83 / 0.7790 / 0.2600 / 75.12</b> | <b>28.07 / 0.7616 / 0.3400 / 95.73</b> | 26.10 / 0.7515 / 0.2794 / <b>88.93</b> | <b>19.86 / 0.6205 / 0.3850 / 131.4</b> | <b>23.58 / 0.5706 / 0.4015 / 117.2</b> |
| $\sigma_y = 0$    | 15    | -                                      | <b>28.25 / 0.7929 / 0.2454 / 72.71</b> | <b>28.90 / 0.7597 / 0.2729 / 85.78</b> | <b>26.80 / 0.7687 / 0.2732 / 87.71</b> | 20.43 / 0.6613 / 0.3541 / 118.5        | <b>24.40 / 0.6331 / 0.3675 / 110.8</b> |
|                   |       | LLE                                    | 27.79 / 0.7883 / 0.2463 / 78.74        | <b>28.98 / 0.8214 / 0.2470 / 77.55</b> | 26.01 / 0.7502 / 0.2887 / 96.92        | 20.91 / 0.6871 / 0.3231 / <b>98.02</b> | <b>24.58 / 0.6506 / 0.3533 / 104.3</b> |
|                   | 3     | -                                      | 31.32 / 0.8131 / 0.2303 / 64.89        | 18.97 / 0.4905 / 0.6174 / 74.62        | 28.69 / 0.8081 / 0.3179 / 114.2        | 17.01 / 0.4249 / 0.6297 / <b>384.5</b> | 21.62 / 0.3585 / 0.6371 / 188.1        |
|                   |       | LLE                                    | <b>33.05 / 0.8934 / 0.1888 / 60.10</b> | <b>24.54 / 0.6356 / 0.4354 / 144.6</b> | <b>28.97 / 0.8314 / 0.2950 / 113.8</b> | 17.21 / 0.4355 / 0.6241 / 386.3        | <b>20.56 / 0.4359 / 0.5950 / 161.8</b> |
|                   | 4     | -                                      | 31.87 / 0.8283 / 0.2253 / 59.87        | 22.17 / 0.5407 / 0.5135 / 161.6        | <b>29.53 / 0.8519 / 0.2565 / 110.1</b> | 17.25 / 0.4463 / 0.6009 / 328.5        | <b>20.84 / 0.3908 / 0.6138 / 176.3</b> |
|                   |       | LLE                                    | <b>33.79 / 0.9082 / 0.1716 / 52.60</b> | <b>26.52 / 0.7557 / 0.3723 / 135.2</b> | <b>29.49 / 0.8508 / 0.2439 / 102.2</b> | <b>18.08 / 0.5483 / 0.5245 / 261.2</b> | <b>21.63 / 0.5008 / 0.5482 / 146.9</b> |
|                   | 5     | -                                      | 31.98 / 0.8292 / 0.2220 / 55.63        | 24.48 / 0.6396 / 0.4412 / 123.5        | <b>29.79 / 0.8608 / 0.2300 / 100.9</b> | 17.74 / 0.4680 / 0.5761 / 290.8        | 21.51 / 0.4715 / 0.5971 / 171.5        |
|                   |       | LLE                                    | <b>34.02 / 0.9108 / 0.1677 / 51.00</b> | <b>27.63 / 0.8034 / 0.3301 / 145.8</b> | 29.47 / 0.8584 / <b>0.2203 / 97.14</b> | <b>18.00 / 0.4967 / 0.5708 / 281.2</b> | <b>22.42 / 0.5518 / 0.5143 / 135.5</b> |
|                   | 7     | -                                      | 32.07 / 0.8290 / 0.2182 / 53.50        | 27.75 / 0.7916 / 0.3334 / 121.8        | <b>30.09 / 0.8683 / 0.2014 / 89.10</b> | 18.39 / 0.4976 / 0.5452 / 255.0        | 22.58 / 0.4633 / 0.5614 / 159.1        |
|                   |       | LLE                                    | <b>34.22 / 0.9197 / 0.1638 / 50.32</b> | <b>29.24 / 0.8523 / 0.2766 / 107.2</b> | 29.95 / 0.8646 / <b>0.1939 / 84.97</b> | <b>18.61 / 0.4976 / 0.5381 / 240.5</b> | <b>23.50 / 0.6217 / 0.4607 / 125.7</b> |
| 10                | -     | 32.10 / 0.8280 / 0.2155 / 51.10        | 29.65 / 0.8550 / 0.2705 / 102.7        | <b>30.31 / 0.8737 / 0.1823 / 78.25</b> | 19.79 / 0.5294 / 0.5083 / 224.6        | 22.97 / 0.4806 / 0.5480 / 155.2        |                                        |
|                   | LLE   | <b>34.60 / 0.9233 / 0.1547 / 47.94</b> | <b>30.43 / 0.8815 / 0.2365 / 94.71</b> | <b>30.15 / 0.8698 / 0.1767 / 72.71</b> | <b>19.16 / 0.5337 / 0.4987 / 215.1</b> | <b>24.27 / 0.6493 / 0.4422 / 118.0</b> |                                        |
| 15                | -     | 32.08 / 0.8243 / 0.2150 / 49.78        | 31.39 / 0.8998 / 0.2066 / 82.40        | <b>30.54 / 0.8786 / 0.1651 / 65.61</b> | 20.88 / 0.5743 / 0.4630 / 187.3        | 23.98 / 0.5037 / 0.5306 / 150.8        |                                        |
|                   | LLE   | <b>34.95 / 0.9294 / 0.1602 / 45.32</b> | <b>31.67 / 0.9059 / 0.1937 / 75.05</b> | <b>30.12 / 0.8751 / 0.1608 / 59.14</b> | <b>19.12 / 0.5346 / 0.4489 / 173.9</b> | <b>24.38 / 0.6011 / 0.4183 / 110.8</b> |                                        |

Table 26: Results of ReSample on CelebA-HQ Dataset.

| Condition         | Steps | Strategy | PSNR↑/SSIM↑/LPIPS↓/FID↓                |                                        |                                        |                                        |                                        |
|-------------------|-------|----------|----------------------------------------|----------------------------------------|----------------------------------------|----------------------------------------|----------------------------------------|
|                   |       |          | Deblur (aniso)                         | Inpainting                             | 4× SR                                  | CS 50%                                 | Deblur (nonlinear)                     |
| $\sigma_y = 0.05$ | 3     | -        | 24.38 / 0.4646 / 0.5055 / 82.32        | 18.53 / 0.3401 / 0.6240 / 126.7        | 22.53 / 0.5515 / 0.6173 / 83.00        | 16.97 / 0.4086 / 0.5922 / 274.4        | 20.75 / 0.3356 / 0.5843 / 69.70        |
|                   |       | LLE      | <b>26.33 / 0.6132 / 0.4034 / 52.55</b> | <b>24.28 / 0.5289 / 0.4467 / 68.89</b> | <b>25.64 / 0.6811 / 0.3975 / 57.69</b> | <b>17.37 / 0.4164 / 0.5717 / 220.4</b> | <b>21.03 / 0.3533 / 0.5776 / 68.11</b> |
|                   | 4     | -        | 24.58 / 0.4692 / 0.4925 / 78.89        | 22.21 / 0.4542 / 0.5113 / 82.43        | 24.44 / 0.5884 / 0.5592 / 71.05        | 17.90 / 0.4457 / 0.5445 / 186.4        | 21.78 / 0.3637 / 0.5511 / 63.35        |
|                   |       | LLE      | <b>26.59 / 0.6082 / 0.3913 / 51.40</b> | <b>25.68 / 0.5865 / 0.4014 / 57.20</b> | <b>25.71 / 0.7205 / 0.3172 / 44.49</b> | <b>18.77 / 0.4801 / 0.5011 / 129.6</b> | <b>22.60 / 0.4064 / 0.5232 / 61.20</b> |
|                   | 5     | -        | 24.65 / 0.4723 / 0.4862 / 77.15        | <b>33.05 / 0.8750 / 0.1967 / 24.81</b> | 25.49 / 0.6101 / 0.5219 / 66.17        | 18.85 / 0.4763 / 0.5042 / 138.3        | 22.32 / 0.3813 / 0.5318 / 60.46        |
|                   |       | LLE      | <b>26.62 / 0.6046 / 0.3893 / 51.56</b> | 26.67 / 0.6266 / 0.3690 / 49.35        | <b>25.71 / 0.7064 / 0.3400 / 50.60</b> | <b>20.01 / 0.5173 / 0.4586 / 95.23</b> | <b>23.39 / 0.4354 / 0.4938 / 59.33</b> |
|                   | 7     | -        | 24.76 / 0.4775 / 0.4778 / 74.75        | 26.80 / 0.6177 / 0.3687 / 48.70        | 26.39 / 0.6359 / 0.4795 / 60.77        | 21.27 / 0.5335 / 0.4356 / 83.15        | 22.70 / 0.3949 / 0.5184 / 59.94        |
|                   |       | LLE      | <b>26.57 / 0.5986 / 0.3850 / 50.77</b> | <b>27.44 / 0.6455 / 0.3467 / 43.48</b> | <b>27.00 / 0.7143 / 0.3416 / 46.86</b> | <b>22.24 / 0.5662 / 0.4017 / 63.13</b> | <b>23.82 / 0.4496 / 0.4808 / 58.36</b> |
|                   | 10    | -        | 24.90 / 0.4840 / 0.4707 / 72.60        | 27.57 / 0.6412 / 0.3437 / 42.99        | 26.83 / 0.6507 / 0.4535 / 57.53        | 22.24 / 0.5618 / 0.3999 / 64.28        | 23.06 / 0.4070 / 0.5069 / 58.38        |
|                   |       | LLE      | <b>26.56 / 0.5946 / 0.3837 / 51.11</b> | <b>27.94 / 0.6597 / 0.3305 / 40.03</b> | <b>27.45 / 0.7247 / 0.3345 / 44.12</b> | <b>23.51 / 0.5989 / 0.3697 / 51.44</b> | <b>24.06 / 0.4571 / 0.4706 / 57.68</b> |
| $\sigma_y = 0$    | 15    | -        | 25.12 / 0.4958 / 0.4607 / 69.47        | 28.02 / 0.6554 / 0.3266 / 39.41        | 27.18 / 0.6659 / 0.4303 / 54.99        | 24.18 / 0.5985 / 0.3618 / 48.68        | 23.29 / 0.4150 / 0.4999 / 57.65        |
|                   |       | LLE      | <b>26.54 / 0.5913 / 0.3841 / 51.67</b> | <b>28.28 / 0.6688 / 0.3179 / 37.92</b> | <b>27.74 / 0.7278 / 0.3331 / 43.08</b> | <b>25.07 / 0.6258 / 0.3428 / 43.29</b> | <b>24.11 / 0.4562 / 0.4708 / 57.79</b> |
|                   | 3     | -        | 29.53 / 0.8407 / 0.2367 / 33.68        | 18.97 / 0.4100 / 0.6083 / 143.9        | 23.49 / 0.7407 / 0.3827 / 83.70        | 17.28 / 0.5204 / 0.5531 / 251.9        | 23.37 / 0.5359 / 0.4908 / 66.63        |
|                   |       | LLE      | <b>29.84 / 0.8459 / 0.2284 / 32.06</b> | <b>26.21 / 0.7144 / 0.3837 / 78.65</b> | <b>28.40 / 0.8284 / 0.2704 / 71.69</b> | <b>17.70 / 0.5242 / 0.5336 / 221.7</b> | <b>24.40 / 0.5976 / 0.4574 / 61.64</b> |
|                   | 4     | -        | 30.20 / 0.8534 / 0.2131 / 28.83        | 23.28 / 0.5739 / 0.4723 / 96.05        | 26.04 / 0.7850 / 0.3078 / 79.23        | 18.29 / 0.5763 / 0.5031 / 189.5        | 25.71 / 0.6473 / 0.4111 / 54.24        |
|                   |       | LLE      | <b>30.28 / 0.8537 / 0.2053 / 27.44</b> | <b>28.54 / 0.8341 / 0.2980 / 71.72</b> | <b>28.90 / 0.8362 / 0.2422 / 64.34</b> | <b>19.25 / 0.5938 / 0.4673 / 149.7</b> | <b>27.60 / 0.7450 / 0.3426 / 44.89</b> |
|                   | 5     | -        | <b>30.46 / 0.8575 / 0.2047 / 27.67</b> | 26.70 / 0.7159 / 0.3720 / 75.57        | 27.66 / 0.8119 / 0.2694 / 73.56        | 19.36 / 0.6244 / 0.4564 / 150.2        | 27.23 / 0.7204 / 0.3497 / 44.37        |
|                   |       | LLE      | <b>30.44 / 0.8557 / 0.1970 / 26.14</b> | <b>30.17 / 0.8727 / 0.2470 / 60.69</b> | <b>29.03 / 0.8389 / 0.2322 / 62.54</b> | <b>20.65 / 0.6527 / 0.4132 / 115.4</b> | <b>29.30 / 0.8135 / 0.2761 / 33.22</b> |
|                   | 7     | -        | <b>30.75 / 0.8625 / 0.1963 / 26.41</b> | 30.74 / 0.8750 / 0.2436 / 55.94        | 29.21 / 0.8433 / 0.2342 / 63.76        | 22.23 / 0.7184 / 0.3626 / 96.49        | 28.68 / 0.7859 / 0.2870 / 35.41        |
|                   |       | LLE      | <b>30.65 / 0.8591 / 0.1887 / 25.14</b> | <b>31.85 / 0.9051 / 0.1964 / 47.63</b> | <b>29.61 / 0.8507 / 0.2105 / 55.46</b> | <b>23.38 / 0.7425 / 0.3259 / 76.04</b> | <b>29.87 / 0.8286 / 0.2624 / 31.42</b> |

Table 27: Results of ReSample on FFHQ Dataset.

| Condition         | Steps | Strategy | PSNR↑/SSIM↑/LPIPS↓/FID↓                |                                        |                                        |                                        |                                        |
|-------------------|-------|----------|----------------------------------------|----------------------------------------|----------------------------------------|----------------------------------------|----------------------------------------|
|                   |       |          | Deblur (aniso)                         | Inpainting                             | 4× SR                                  | CS 50%                                 | Deblur (nonlinear)                     |
| $\sigma_y = 0.05$ | 3     | -        | 23.92 / 0.4564 / 0.5266 / 148.7        | 18.65 / 0.3506 / 0.6278 / 186.8        | 22.55 / 0.5577 / 0.6204 / 161.8        | 16.83 / 0.4080 / 0.6099 / 361.7        | 18.64 / 0.2604 / 0.6749 / 187.1        |
|                   |       | LLE      | <b>25.88 / 0.6152 / 0.4221 / 116.8</b> | <b>23.38 / 0.4981 / 0.4780 / 141.1</b> | <b>25.06 / 0.6676 / 0.4180 / 124.7</b> | <b>17.14 / 0.4138 / 0.5951 / 314.6</b> | <b>18.86 / 0.2714 / 0.6730 / 183.3</b> |
|                   | 4     | -        | 24.10 / 0.4605 / 0.5159 / 145.7        | 21.88 / 0.4512 / 0.5299 / 146.1        | 24.16 / 0.5853 / 0.5760 / 148.2        | 17.57 / 0.4410 / 0.5679 / 269.2        | 19.97 / 0.2892 / 0.6388 / 164.1        |
|                   |       | LLE      | <b>26.20 / 0.6140 / 0.4114 / 114.4</b> | <b>25.09 / 0.5881 / 0.4243 / 126.2</b> | <b>25.19 / 0.7083 / 0.3492 / 112.1</b> | <b>18.32 / 0.4758 / 0.5307 / 210.5</b> | <b>20.13 / 0.2977 / 0.6447 / 165.2</b> |
|                   | 5     | -        | 24.18 / 0.4632 / 0.5100 / 141.7        | 24.03 / 0.5267 / 0.4625 / 127.9        | 24.98 / 0.6021 / 0.5481 / 140.6        | 18.25 / 0.4668 / 0.5328 / 222.0        | 20.85 / 0.3177 / 0.6036 / 149.0        |
|                   |       | LLE      | <b>26.28 / 0.6117 / 0.4101 / 115.7</b> | <b>25.95 / 0.6139 / 0.3987 / 113.4</b> | <b>25.02 / 0.6957 / 0.3706 / 121.9</b> | <b>19.17 / 0.5063 / 0.4921 / 174.4</b> | <b>21.00 / 0.3309 / 0.6019 / 151.0</b> |
|                   | 7     | -        | 24.30 / 0.4678 / 0.5021 / 141.6        | 26.01 / 0.5996 / 0.3998 / 111.0        | 25.79 / 0.6224 / 0.5119 / 131.0        | 19.80 / 0.5137 / 0.4722 / 159.2        | 21.30 / 0.3329 / 0.5847 / 143.9        |
|                   |       | LLE      | <b>26.27 / 0.6051 / 0.4054 / 114.0</b> | <b>26.85 / 0.6376 / 0.3727 / 101.4</b> | <b>26.30 / 0.7073 / 0.3716 / 113.4</b> | <b>20.60 / 0.5484 / 0.4401 / 139.1</b> | <b>21.77 / 0.3670 / 0.5727 / 143.4</b> |
|                   | 10    | -        | 24.44 / 0.4749 / 0.4931 / 137.4        | 26.91 / 0.6275 / 0.3697 / 96.86        | 26.24 / 0.6376 / 0.4825 / 125.3        | 21.00 / 0.5457 / 0.4314 / 131.3        | 21.61 / 0.3478 / 0.5667 / 138.1        |
|                   |       | LLE      | <b>26.30 / 0.6015 / 0.4035 / 113.6</b> | <b>27.48 / 0.6551 / 0.3529 / 93.98</b> | <b>26.63 / 0.7179 / 0.3600 / 109.8</b> | <b>21.94 / 0.5831 / 0.4013 / 114.5</b> | <b>22.30 / 0.3916 / 0.5497 / 139.0</b> |
| $\sigma_y = 0$    | 15    | -        | 24.69 / 0.4871 / 0.4827 / 135.2        | 27.55 / 0.6471 / 0.3463 / 88.74        | 26.61 / 0.6540 / 0.4532 / 119.3        | 22.45 / 0.5799 / 0.3909 / 109.2        | 22.01 / 0.3642 / 0.5486 / 133.4        |
|                   |       | LLE      | <b>26.33 / 0.5984 / 0.4018 / 113.7</b> | <b>27.99 / 0.6701 / 0.3329 / 86.09</b> | <b>27.11 / 0.7246 / 0.3541 / 105.1</b> | <b>23.24 / 0.6119 / 0.3683 / 102.9</b> | <b>22.66 / 0.4051 / 0.5308 / 136.3</b> |
|                   | 3     | -        | 28.90 / 0.8396 / 0.2488 / 81.28        | 19.06 / 0.4239 / 0.6122 / 197.1        | 23.59 / 0.7569 / 0.3913 / 149.4        | 17.12 / 0.5146 / 0.5731 / 345.1        | 20.11 / 0.4191 / 0.6069 / 175.1        |
|                   |       | LLE      | <b>29.26 / 0.8465 / 0.2402 / 77.02</b> | <b>24.62 / 0.6343 / 0.4303 / 145.8</b> | <b>27.57 / 0.8180 / 0.2945 / 129.4</b> | <b>17.44 / 0.5183 / 0.5602 / 317.3</b> | <b>20.33 / 0.4265 / 0.6041 / 179.4</b> |
|                   | 4     | -        | 29.49 / 0.8509 / 0.2298 / 72.39        | 22.80 / 0.5685 / 0.4974 / 157.6        | 25.76 / 0.7901 / 0.3295 / 143.2        | 17.91 / 0.5642 / 0.5286 / 282.2        | 22.22 / 0.5097 / 0.5362 / 154.2        |
|                   |       | LLE      | <b>29.69 / 0.8543 / 0.2215 / 69.08</b> | <b>27.03 / 0.7907 / 0.3530 / 132.5</b> | <b>28.01 / 0.8263 / 0.2613 / 120.8</b> | <b>18.70 / 0.5792 / 0.4999 / 239.6</b> | <b>22.36 / 0.5033 / 0.5527 / 151.0</b> |
|                   | 5     | -        | 29.72 / 0.8557 / 0.2233 / 69.89        | 25.65 / 0.6928 / 0.4093 / 137.2        | 27.02 / 0.8101 / 0.2951 / 131.8        | 18.67 / 0.6049 / 0.4879 / 237.6        | 23.59 / 0.5829 / 0.4740 / 139.0        |
|                   |       | LLE      | <b>29.81 / 0.8559 / 0.2160 / 66.27</b> | <b>28.30 / 0.8281 / 0.3133 / 122.1</b> | <b>28.19 / 0.8287 / 0.2589 / 120.1</b> | <b>19.66 / 0.6253 / 0.4550 / 199.8</b> | <b>23.78 / 0.5962 / 0.4797 / 137.0</b> |
|                   | 7     | -        | <b>30.04 / 0.8611 / 0.2163 / 67.46</b> | 28.93 / 0.8339 / 0.3053 / 117.9        | 28.38 / 0.8339 / 0.2587 / 121.5        | 20.44 / 0.6807 / 0.4106 / 178.4        | 24.63 / 0.6205 / 0.4224 / 125.7        |
|                   |       | LLE      | <b>30.00 / 0.8601 / 0.2097 / 65.11</b> | <b>29.97 / 0.8712 / 0.2609 / 104.5</b> | <b>28.78 / 0.8420 / 0.2344 / 108.6</b> | <b>21.31 / 0.6997 / 0.3823 / 156.3</b> | <b>25.01 / 0.6743 / 0.4215 / 117.3</b> |

Table 28: Results of DAPS on CelebA-HQ Dataset.

| Condition         | Steps | Strategy                        | PSNR↑/SSIM↑/LPIPS↓/FID↓         |                                 |                                 |                                 |                                 |
|-------------------|-------|---------------------------------|---------------------------------|---------------------------------|---------------------------------|---------------------------------|---------------------------------|
|                   |       |                                 | Deblur (aniso)                  | Inpainting                      | 4× SR                           | CS 50%                          | Deblur (nonlinear)              |
| $\sigma_y = 0.05$ | 3     | -                               | 24.49 / 0.4730 / 0.4519 / 57.90 | 18.54 / 0.3297 / 0.6161 / 119.6 | 21.56 / 0.4427 / 0.5080 / 66.27 | 16.70 / 0.3748 / 0.6047 / 266.9 | 22.60 / 0.4216 / 0.5087 / 58.76 |
|                   |       | LLE                             | 24.92 / 0.5005 / 0.4478 / 58.94 | 21.61 / 0.3745 / 0.5213 / 74.74 | 25.41 / 0.6035 / 0.4113 / 52.38 | 16.81 / 0.3728 / 0.6011 / 248.9 | 22.55 / 0.4229 / 0.5163 / 60.80 |
|                   | 4     | -                               | 25.37 / 0.5238 / 0.4054 / 49.97 | 22.44 / 0.4492 / 0.4946 / 73.24 | 24.04 / 0.5153 / 0.4291 / 53.40 | 17.46 / 0.4152 / 0.5561 / 180.4 | 24.00 / 0.4652 / 0.4608 / 52.99 |
|                   |       | LLE                             | 25.81 / 0.5525 / 0.4002 / 50.32 | 24.58 / 0.5239 / 0.4280 / 56.76 | 25.64 / 0.6475 / 0.3711 / 48.09 | 17.74 / 0.4097 / 0.5505 / 160.4 | 23.98 / 0.4674 / 0.4697 / 54.86 |
|                   | 5     | -                               | 25.93 / 0.5612 / 0.3787 / 45.24 | 24.77 / 0.5314 / 0.4225 / 55.97 | 25.10 / 0.5627 / 0.3898 / 47.60 | 18.25 / 0.4490 / 0.5167 / 135.7 | 24.56 / 0.4873 / 0.4324 / 49.44 |
|                   |       | LLE                             | 26.37 / 0.5913 / 0.3709 / 45.97 | 25.64 / 0.5744 / 0.3942 / 51.58 | 25.70 / 0.6643 / 0.3581 / 47.53 | 18.71 / 0.4472 / 0.5079 / 119.1 | 24.66 / 0.4918 / 0.4347 / 50.73 |
|                   | 7     | -                               | 26.65 / 0.6134 / 0.3428 / 39.63 | 26.70 / 0.6083 / 0.3622 / 44.70 | 25.96 / 0.6211 / 0.3470 / 40.74 | 20.55 / 0.5165 / 0.4437 / 82.84 | 25.20 / 0.5167 / 0.3944 / 45.96 |
|                   |       | LLE                             | 26.99 / 0.6448 / 0.3297 / 39.01 | 26.81 / 0.6182 / 0.3591 / 44.67 | 26.35 / 0.6999 / 0.3277 / 43.55 | 20.83 / 0.5190 / 0.4392 / 77.58 | 25.28 / 0.5211 / 0.3926 / 45.90 |
|                   | 10    | -                               | 27.24 / 0.6585 / 0.3124 / 35.02 | 27.61 / 0.6457 / 0.3330 / 39.74 | 26.53 / 0.6640 / 0.3166 / 35.59 | 21.76 / 0.5616 / 0.3988 / 62.31 | 25.71 / 0.5439 / 0.3638 / 42.01 |
|                   |       | LLE                             | 27.43 / 0.6846 / 0.2999 / 33.93 | 27.76 / 0.6558 / 0.3310 / 40.16 | 26.79 / 0.7220 / 0.3012 / 37.97 | 22.02 / 0.5667 / 0.3951 / 59.68 | 25.71 / 0.5471 / 0.3568 / 41.59 |
| $\sigma_y = 0$    | 15    | -                               | 27.77 / 0.6999 / 0.2856 / 31.11 | 28.47 / 0.6837 / 0.3053 / 35.66 | 27.03 / 0.7016 / 0.2915 / 31.50 | 23.85 / 0.6207 / 0.3510 / 47.32 | 26.31 / 0.5774 / 0.3348 / 38.94 |
|                   |       | LLE                             | 27.65 / 0.7191 / 0.2749 / 30.61 | 28.79 / 0.7002 / 0.2999 / 35.68 | 27.33 / 0.7414 / 0.2800 / 33.33 | 24.01 / 0.6365 / 0.3439 / 46.05 | 26.20 / 0.5806 / 0.3236 / 37.59 |
|                   | 3     | -                               | 29.39 / 0.7143 / 0.2908 / 33.95 | 18.93 / 0.3765 / 0.5962 / 127.9 | 26.40 / 0.5880 / 0.3675 / 45.63 | 16.98 / 0.4460 / 0.5807 / 278.0 | 25.37 / 0.6509 / 0.3974 / 45.94 |
|                   |       | LLE                             | 31.69 / 0.8148 / 0.2387 / 31.34 | 22.45 / 0.4363 / 0.4823 / 74.01 | 28.00 / 0.7207 / 0.3419 / 55.98 | 17.11 / 0.4491 / 0.5754 / 269.4 | 25.68 / 0.6765 / 0.3823 / 44.36 |
|                   | 4     | -                               | 30.26 / 0.7547 / 0.2626 / 30.33 | 23.42 / 0.5375 / 0.4568 / 76.84 | 27.18 / 0.6355 / 0.3321 / 40.65 | 17.79 / 0.5009 / 0.5284 / 199.6 | 27.43 / 0.7203 / 0.3413 / 37.14 |
|                   |       | LLE                             | 32.43 / 0.8441 / 0.2148 / 26.91 | 26.31 / 0.6650 / 0.3649 / 56.77 | 28.71 / 0.7544 / 0.3044 / 49.67 | 18.08 / 0.4933 / 0.5224 / 182.0 | 28.13 / 0.7689 / 0.3090 / 33.98 |
|                   | 5     | -                               | 30.90 / 0.7827 / 0.2431 / 27.80 | 26.52 / 0.6652 / 0.3633 / 56.46 | 27.72 / 0.6690 / 0.3096 / 37.25 | 18.65 / 0.4582 / 0.4837 / 152.8 | 28.24 / 0.7867 / 0.3067 / 32.81 |
|                   |       | LLE                             | 32.81 / 0.8591 / 0.2027 / 25.30 | 27.87 / 0.7479 / 0.3160 / 51.54 | 29.12 / 0.7747 / 0.2845 / 46.69 | 19.15 / 0.5464 / 0.4727 / 136.3 | 29.30 / 0.8544 / 0.2727 / 29.51 |
|                   | 7     | -                               | 31.80 / 0.8191 / 0.2168 / 23.95 | 29.62 / 0.7971 / 0.2698 / 41.52 | 28.43 / 0.7136 / 0.2791 / 32.58 | 21.23 / 0.6432 / 0.3934 / 92.08 | 29.07 / 0.7888 / 0.2664 / 27.85 |
|                   |       | LLE                             | 33.55 / 0.8856 / 0.1834 / 23.23 | 29.82 / 0.8176 / 0.2605 / 42.71 | 29.47 / 0.7959 / 0.2693 / 41.98 | 21.56 / 0.6462 / 0.3875 / 86.80 | 30.03 / 0.8316 / 0.2387 / 24.93 |
| 10                | -     | 32.61 / 0.8486 / 0.1939 / 20.98 | 31.20 / 0.864 / 0.2266 / 33.11  | 29.03 / 0.7508 / 0.2526 / 28.68 | 22.63 / 0.7034 / 0.3361 / 66.86 | 29.54 / 0.8100 / 0.2398 / 24.56 |                                 |
|                   | LLE   | 33.91 / 0.8967 / 0.1727 / 21.46 | 31.42 / 0.8637 / 0.2163 / 35.04 | 29.97 / 0.8186 / 0.2613 / 24.77 | 22.89 / 0.7067 / 0.3333 / 65.45 | 30.55 / 0.8489 / 0.2234 / 22.88 |                                 |
| 15                | -     | 33.43 / 0.8745 / 0.1725 / 17.87 | 32.47 / 0.8798 / 0.1883 / 26.74 | 30.45 / 0.8360 / 0.2284 / 24.99 | 25.14 / 0.7722 / 0.2754 / 45.95 | 30.89 / 0.8251 / 0.2180 / 22.15 |                                 |
|                   | LLE   | 34.24 / 0.9070 / 0.1631 / 20.29 | 32.85 / 0.8949 / 0.1781 / 26.79 | 30.51 / 0.8731 / 0.2458 / 39.99 | 25.32 / 0.7810 / 0.2708 / 46.20 | 30.97 / 0.8635 / 0.2090 / 20.72 |                                 |

Table 29: Results of DAPS on FFHQ Dataset.

| Condition         | Steps | Strategy | PSNR↑/SSIM↑/LPIPS↓/FID↓                |                                        |                                        |                                        |                                        |
|-------------------|-------|----------|----------------------------------------|----------------------------------------|----------------------------------------|----------------------------------------|----------------------------------------|
|                   |       |          | Deblur (aniso)                         | Inpainting                             | 4× SR                                  | CS 50%                                 | Deblur (nonlinear)                     |
| $\sigma_y = 0.05$ | 3     | -        | 23.82 / 0.4509 / 0.4872 / <b>130.6</b> | 18.11 / 0.3216 / 0.6280 / 193.8        | 21.35 / 0.4240 / 0.5346 / 135.2        | 16.43 / 0.3556 / 0.6324 / <b>368.5</b> | 18.97 / 0.2847 / 0.6416 / <b>168.9</b> |
|                   |       | LLE      | <b>24.18 / 0.4741 / 0.4858 / 132.1</b> | <b>19.98 / 0.3377 / 0.5652 / 160.2</b> | <b>24.42 / 0.5647 / 0.4596 / 128.3</b> | <b>16.54 / 0.3637 / 0.6309 / 377.4</b> | <b>19.10 / 0.2913 / 0.6370 / 173.0</b> |
|                   | 4     | -        | 24.67 / 0.4989 / 0.4454 / <b>115.9</b> | 21.80 / 0.4299 / 0.5197 / 142.0        | 23.37 / 0.4856 / 0.4714 / <b>123.8</b> | 16.99 / <b>0.3922</b> / 0.5894 / 282.5 | <b>20.85 / 0.3521 / 0.5584 / 141.8</b> |
|                   |       | LLE      | <b>25.05 / 0.5243 / 0.4449 / 117.0</b> | <b>23.49 / 0.4817 / 0.4676 / 127.3</b> | <b>24.74 / 0.6058 / 0.4287 / 124.5</b> | <b>17.20 / 0.3870 / 0.5894 / 272.0</b> | 20.78 / <b>0.3525</b> / 0.5629 / 143.7 |
|                   | 5     | -        | 25.22 / 0.5352 / 0.4220 / <b>110.9</b> | 23.95 / 0.5043 / 0.4546 / 120.1        | 24.24 / 0.5262 / 0.4421 / <b>115.7</b> | 17.59 / <b>0.4209</b> / 0.5552 / 228.0 | <b>21.85 / 0.3871 / 0.5195 / 129.5</b> |
|                   |       | LLE      | <b>25.59 / 0.5626 / 0.4181 / 112.6</b> | <b>24.48 / 0.5311 / 0.4346 / 118.1</b> | <b>24.94 / 0.6293 / 0.4113 / 119.0</b> | <b>17.92 / 0.4171 / 0.5516 / 212.8</b> | 21.81 / 0.3862 / 0.5236 / 131.0        |
|                   | 7     | -        | 25.97 / 0.5866 / 0.3904 / 103.5        | 25.71 / 0.5741 / 0.3979 / <b>102.1</b> | 25.03 / 0.5806 / 0.4060 / <b>111.3</b> | 19.05 / <b>0.4769</b> / 0.4918 / 172.3 | <b>22.80 / 0.4227 / 0.4749 / 120.5</b> |
|                   |       | LLE      | <b>26.25 / 0.6165 / 0.3825 / 103.4</b> | <b>25.75 / 0.5803 / 0.3961 / 105.1</b> | <b>25.44 / 0.6648 / 0.3814 / 114.6</b> | <b>19.33 / 0.4740 / 0.4900 / 161.7</b> | 22.76 / 0.4218 / 0.4807 / 121.8        |
|                   | 10    | -        | 26.59 / 0.6330 / 0.3612 / 98.73        | 26.71 / 0.6146 / <b>0.3649 / 91.47</b> | 25.59 / 0.6249 / 0.3776 / 106.0        | 20.12 / 0.5216 / 0.4417 / 137.8        | 23.35 / 0.4527 / 0.4472 / <b>116.2</b> |
|                   |       | LLE      | <b>27.22 / 0.6802 / 0.3348 / 90.30</b> | 27.67 / 0.6557 / 0.3315 / <b>83.41</b> | 26.16 / 0.6677 / 0.3513 / 101.2        | 21.77 / 0.5804 / 0.3883 / <b>108.6</b> | <b>23.93 / 0.4884 / 0.4172 / 112.2</b> |
| $\sigma_y = 0$    | 15    | -        | 27.11 / <b>0.7017 / 0.3278 / 95.27</b> | <b>27.83 / 0.6684 / 0.3296 / 85.67</b> | <b>26.43 / 0.7120 / 0.3357 / 97.74</b> | <b>22.00 / 0.5853 / 0.3854 / 110.5</b> | 23.89 / <b>0.4914 / 0.4119 / 111.0</b> |
|                   |       | LLE      | 28.66 / 0.6918 / 0.3179 / 80.09        | 18.48 / 0.3716 / 0.6071 / 200.4        | 25.54 / 0.5555 / 0.4055 / <b>109.2</b> | 16.70 / 0.4218 / 0.6093 / <b>379.6</b> | 20.10 / 0.4128 / 0.5904 / 166.6        |
|                   | 3     | -        | 29.56 / 0.7336 / 0.2900 / 73.34        | 22.70 / 0.5194 / 0.4807 / 147.8        | 26.34 / 0.6033 / 0.3720 / <b>96.68</b> | 17.29 / <b>0.4727 / 0.5619 / 297.8</b> | <b>22.37 / 0.5376 / 0.4839 / 131.5</b> |
|                   |       | LLE      | <b>31.61 / 0.8245 / 0.2394 / 66.55</b> | <b>24.98 / 0.6101 / 0.4120 / 127.2</b> | <b>27.78 / 0.7226 / 0.3480 / 111.8</b> | <b>17.52 / 0.4680 / 0.5622 / 292.1</b> | 22.36 / <b>0.5502 / 0.4787 / 129.0</b> |
|                   | 4     | -        | 30.22 / 0.7626 / 0.2700 / 68.05        | 25.48 / 0.6333 / 0.3982 / 119.0        | 26.90 / 0.6380 / 0.3491 / <b>90.89</b> | 17.95 / <b>0.5137 / 0.5232 / 246.7</b> | 23.72 / 0.6058 / 0.4300 / <b>113.3</b> |
|                   |       | LLE      | <b>32.03 / 0.8424 / 0.2261 / 63.79</b> | <b>26.37 / 0.6934 / 0.3662 / 116.5</b> | <b>28.21 / 0.7453 / 0.3227 / 103.3</b> | <b>18.32 / 0.5100 / 0.5194 / 231.8</b> | 23.72 / <b>0.6241 / 0.4253 / 115.6</b> |
|                   | 5     | -        | 31.21 / 0.8025 / 0.2417 / 62.32        | 28.18 / 0.7534 / 0.3146 / 98.21        | 27.71 / 0.6864 / 0.3184 / <b>83.45</b> | 19.56 / <b>0.5952 / 0.4473 / 181.1</b> | 24.98 / 0.6651 / 0.3759 / <b>102.5</b> |
|                   |       | LLE      | <b>32.89 / 0.8753 / 0.1991 / 57.87</b> | <b>28.31 / 0.7732 / 0.3085 / 97.76</b> | <b>28.61 / 0.7709 / 0.3027 / 96.55</b> | <b>19.89 / 0.5931 / 0.4445 / 173.5</b> | <b>25.25 / 0.6991 / 0.3700 / 105.2</b> |
|                   | 7     | -        | 32.14 / 0.8362 / 0.2150 / 54.74        | 29.86 / 0.8130 / 0.2653 / <b>80.17</b> | 28.39 / 0.7276 / 0.2891 / <b>78.51</b> | 20.75 / 0.6570 / 0.3857 / 144.2        | 25.56 / 0.6986 / 0.3454 / <b>95.53</b> |
|                   |       | LLE      | <b>33.35 / 0.8907 / 0.1847 / 54.45</b> | <b>29.91 / 0.8292 / 0.2629 / 86.08</b> | <b>29.01 / 0.7923 / 0.2823 / 87.14</b> | <b>21.19 / 0.6603 / 0.3816 / 139.3</b> | <b>25.80 / 0.7309 / 0.3426 / 100.6</b> |
|                   | 10    | -        | 33.15 / 0.8676 / 0.1876 / <b>47.85</b> | 31.36 / 0.8576 / 0.2203 / <b>66.01</b> | 29.08 / 0.7677 / <b>0.2603 / 70.31</b> | 22.66 / 0.7312 / 0.3172 / <b>107.8</b> | 26.04 / 0.7251 / <b>0.3161 / 92.32</b> |
|                   |       | LLE      | <b>33.75 / 0.9046 / 0.1715 / 51.07</b> | <b>31.51 / 0.8727 / 0.2151 / 67.73</b> | <b>29.41 / 0.8090 / 0.2626 / 77.98</b> | <b>22.91 / 0.7338 / 0.3163 / 111.4</b> | <b>26.27 / 0.7556 / 0.3213 / 96.30</b> |

## 755 I More qualitative results

756 Here we present more visualization results. Anisotropic Deblurring results are shown in Figure 10. In-  
 757 painting results are shown in Figure 11. Super-Resolution results are shown in Figure 12. Compressed  
 758 Sensing results are shown in Figure 13. Nonlinear Deblurring results are shown in Figure 14.

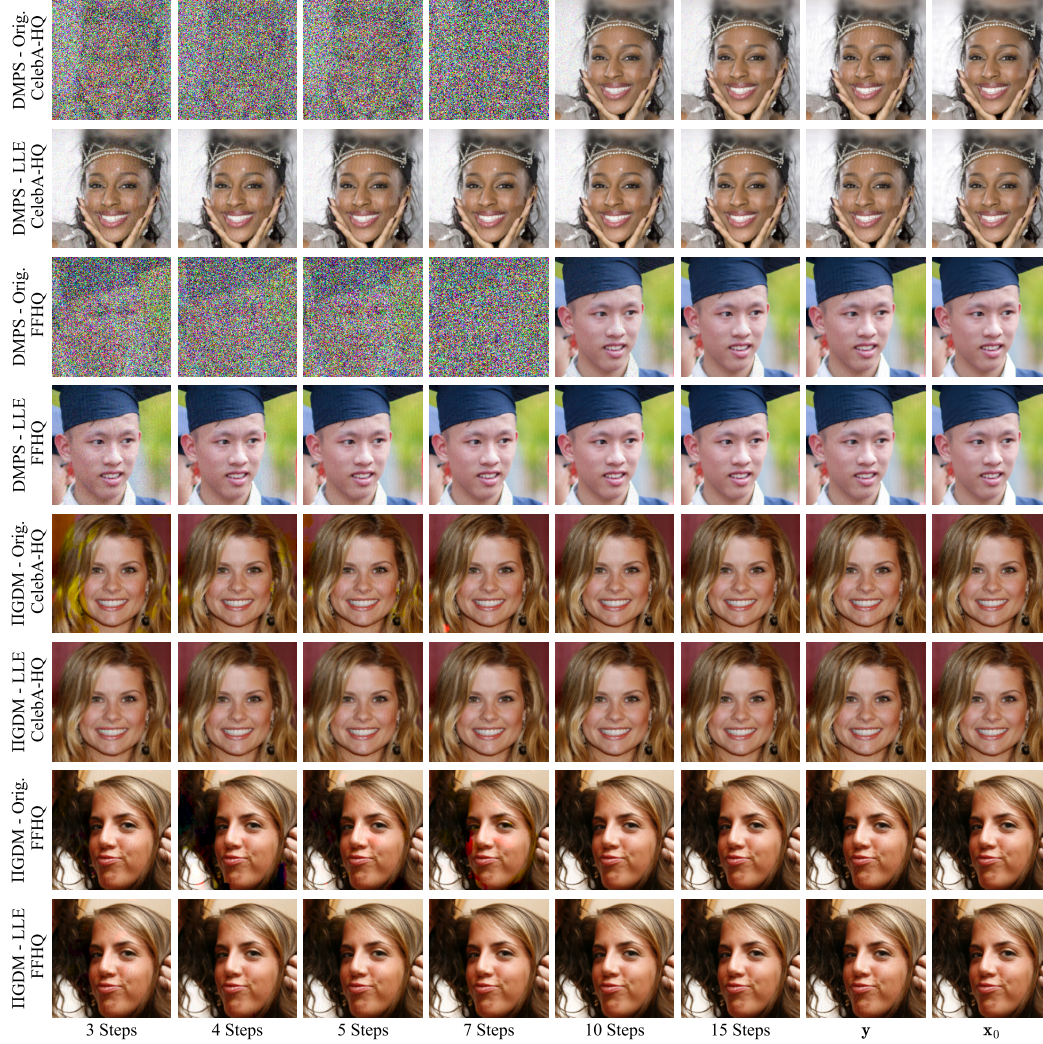

Figure 10: Visualization of anisotropic Deblurring.



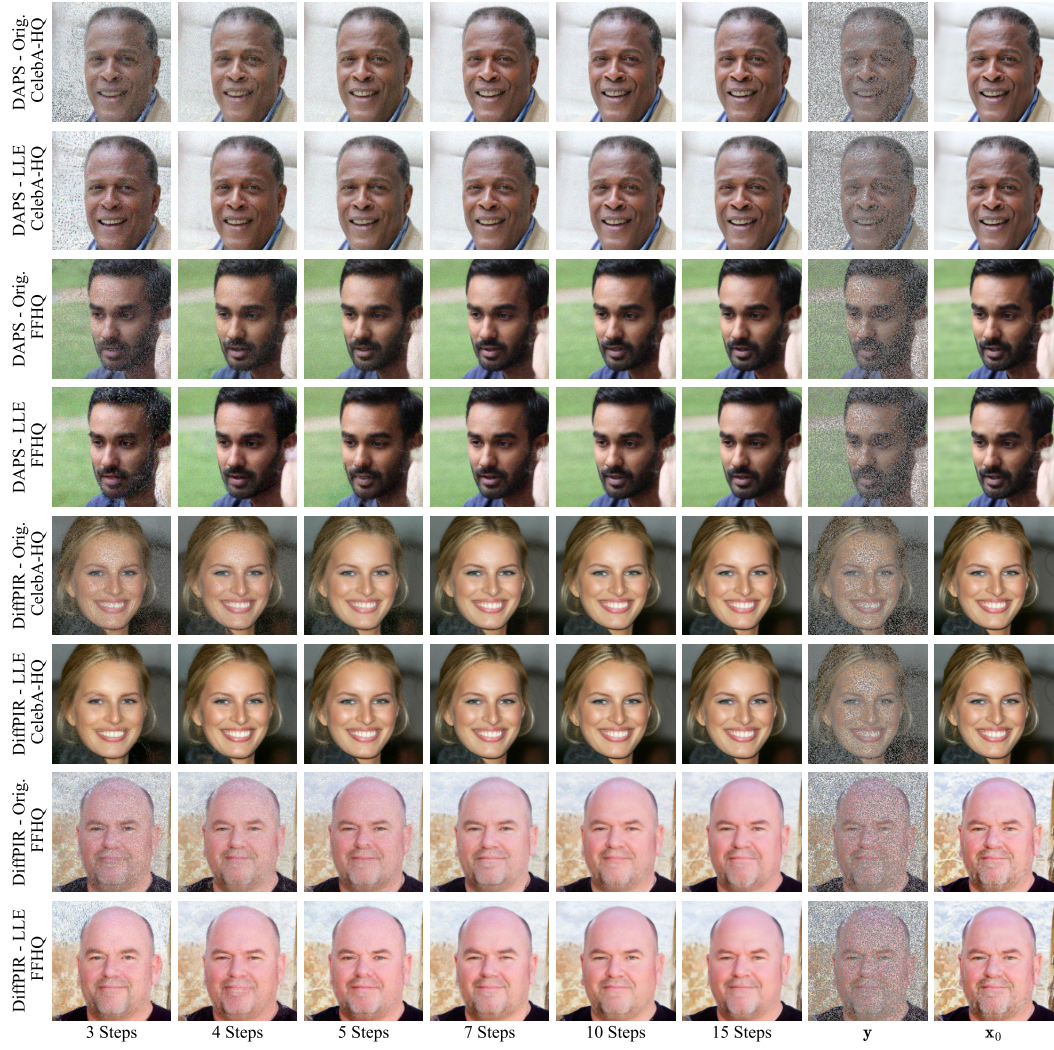

Figure 11: Visualization of Inpainting.



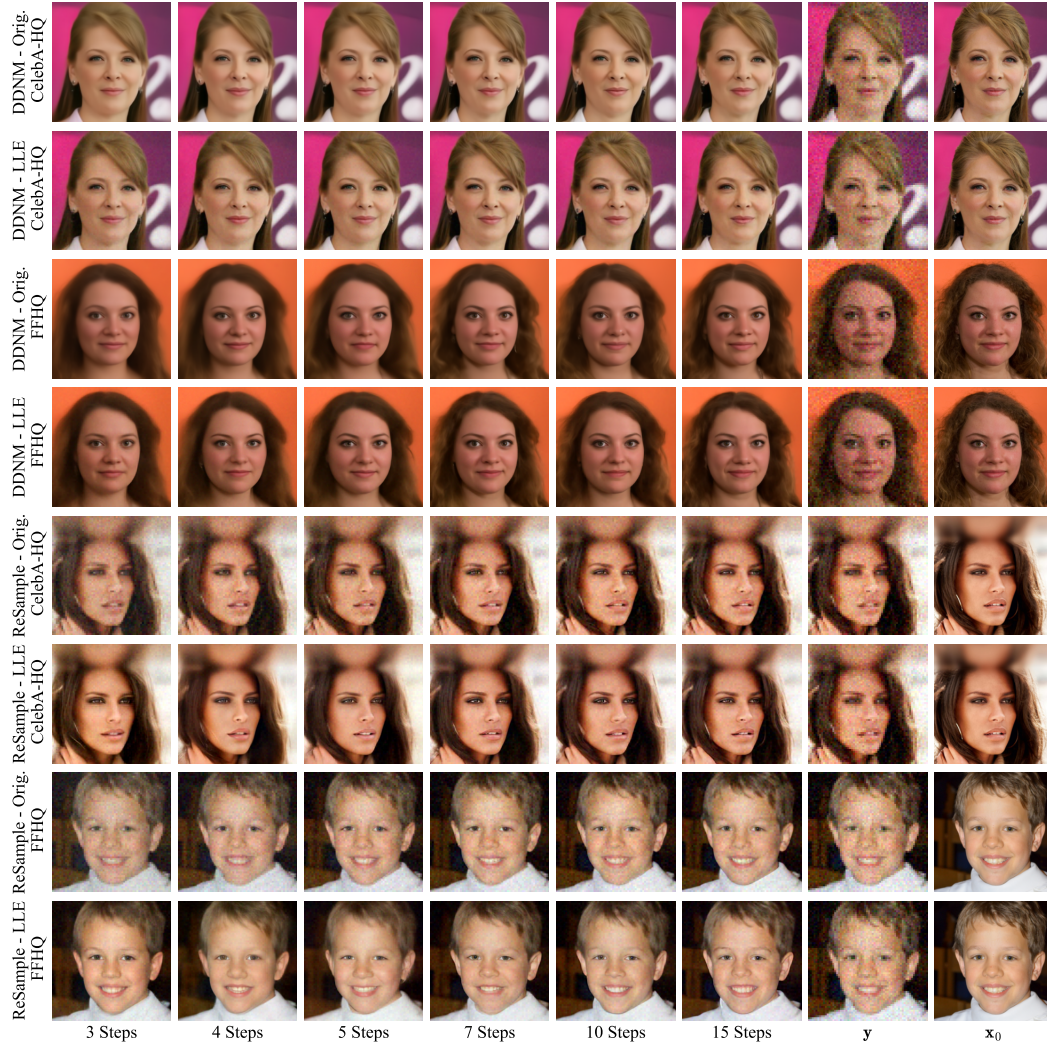

Figure 12: Visualization of Super-Resolution.

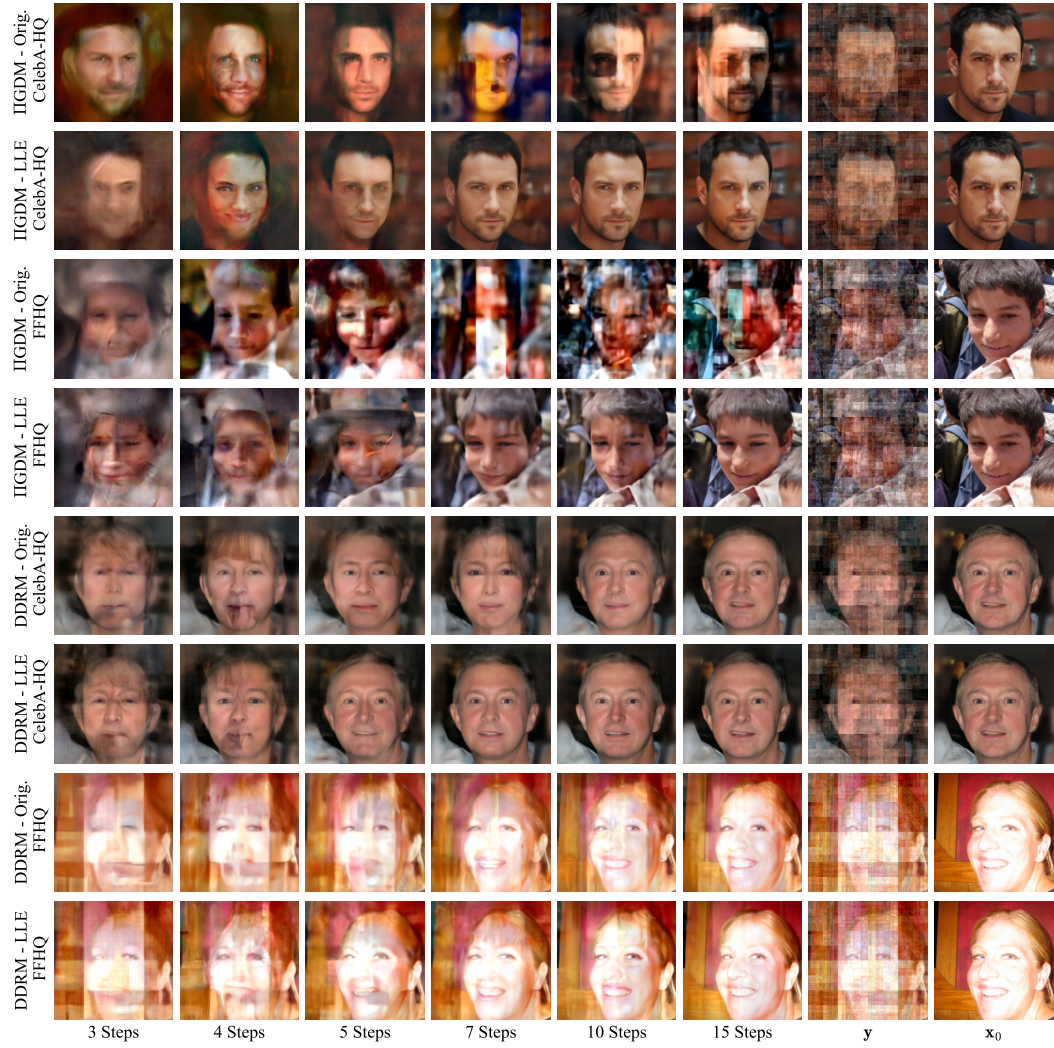

Figure 13: Visualization of Compressed Sensing.



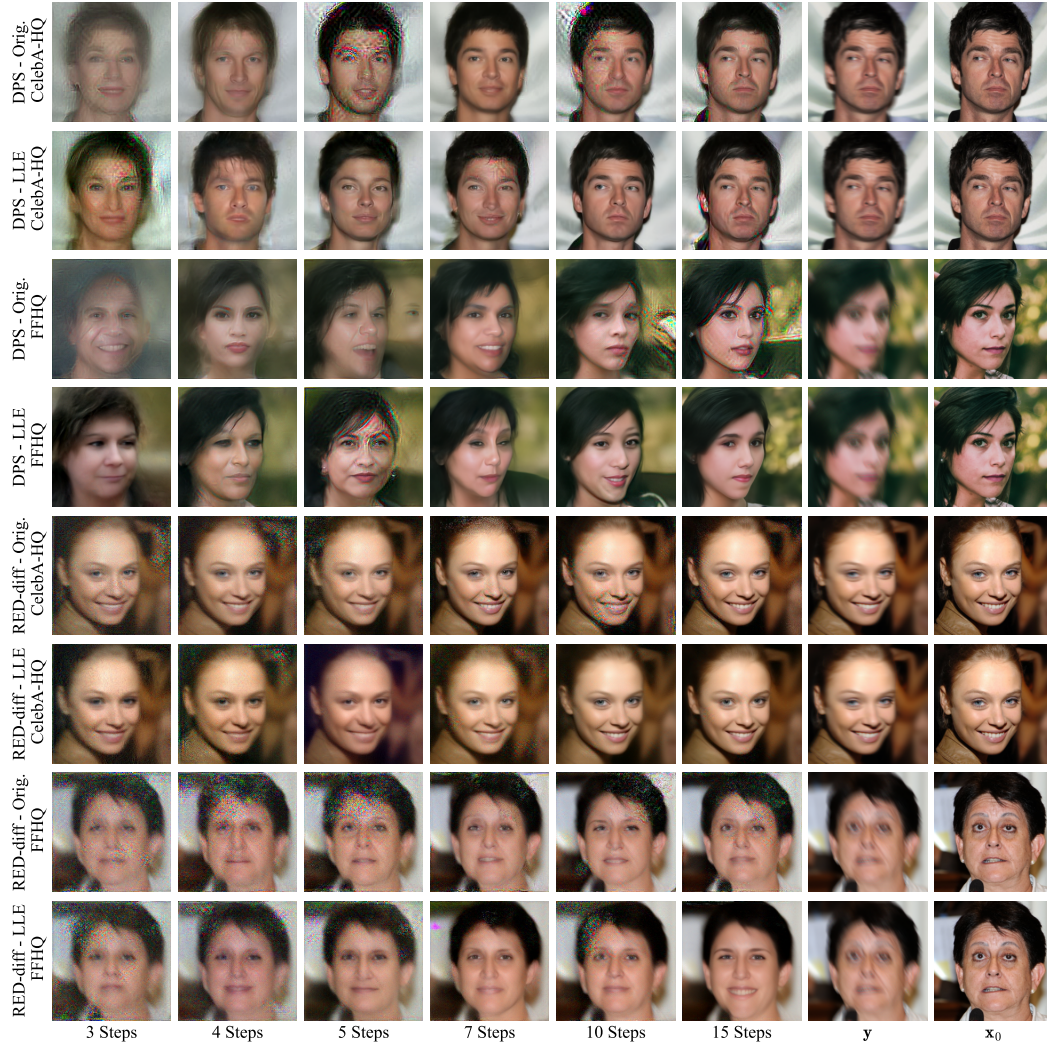

Figure 14: Visualization of nonlinear Deblurring.

## NeurIPS Paper Checklist

### 1. Claims

Question: Do the main claims made in the abstract and introduction accurately reflect the paper's contributions and scope?

Answer: [\[Yes\]](#)

Justification: The claims made in the abstract and introduction are consistent with this paper's main contributions and scope, and have been verified through extensive experiments and ablation studies.

Guidelines:

- The answer NA means that the abstract and introduction do not include the claims made in the paper.
- The abstract and/or introduction should clearly state the claims made, including the contributions made in the paper and important assumptions and limitations. A No or NA answer to this question will not be perceived well by the reviewers.
- The claims made should match theoretical and experimental results, and reflect how much the results can be expected to generalize to other settings.
- It is fine to include aspirational goals as motivation as long as it is clear that these goals are not attained by the paper.

### 2. Limitations

Question: Does the paper discuss the limitations of the work performed by the authors?

Answer: [\[Yes\]](#)

Justification: See Section 6.

Guidelines:

- The answer NA means that the paper has no limitation while the answer No means that the paper has limitations, but those are not discussed in the paper.
- The authors are encouraged to create a separate "Limitations" section in their paper.
- The paper should point out any strong assumptions and how robust the results are to violations of these assumptions (e.g., independence assumptions, noiseless settings, model well-specification, asymptotic approximations only holding locally). The authors should reflect on how these assumptions might be violated in practice and what the implications would be.
- The authors should reflect on the scope of the claims made, e.g., if the approach was only tested on a few datasets or with a few runs. In general, empirical results often depend on implicit assumptions, which should be articulated.
- The authors should reflect on the factors that influence the performance of the approach. For example, a facial recognition algorithm may perform poorly when image resolution is low or images are taken in low lighting. Or a speech-to-text system might not be used reliably to provide closed captions for online lectures because it fails to handle technical jargon.
- The authors should discuss the computational efficiency of the proposed algorithms and how they scale with dataset size.
- If applicable, the authors should discuss possible limitations of their approach to address problems of privacy and fairness.
- While the authors might fear that complete honesty about limitations might be used by reviewers as grounds for rejection, a worse outcome might be that reviewers discover limitations that aren't acknowledged in the paper. The authors should use their best judgment and recognize that individual actions in favor of transparency play an important role in developing norms that preserve the integrity of the community. Reviewers will be specifically instructed to not penalize honesty concerning limitations.

### 3. Theory assumptions and proofs

Question: For each theoretical result, does the paper provide the full set of assumptions and a complete (and correct) proof?

Answer: [Yes]

Justification: See Appendix B.

Guidelines:

- The answer NA means that the paper does not include theoretical results.
- All the theorems, formulas, and proofs in the paper should be numbered and cross-referenced.
- All assumptions should be clearly stated or referenced in the statement of any theorems.
- The proofs can either appear in the main paper or the supplemental material, but if they appear in the supplemental material, the authors are encouraged to provide a short proof sketch to provide intuition.
- Inversely, any informal proof provided in the core of the paper should be complemented by formal proofs provided in appendix or supplemental material.
- Theorems and Lemmas that the proof relies upon should be properly referenced.

#### 4. Experimental result reproducibility

Question: Does the paper fully disclose all the information needed to reproduce the main experimental results of the paper to the extent that it affects the main claims and/or conclusions of the paper (regardless of whether the code and data are provided or not)?

Answer: [Yes]

Justification: The code is included in the supplemental materials and the experiment details are presented in Appendix F.

Guidelines:

- The answer NA means that the paper does not include experiments.
- If the paper includes experiments, a No answer to this question will not be perceived well by the reviewers: Making the paper reproducible is important, regardless of whether the code and data are provided or not.
- If the contribution is a dataset and/or model, the authors should describe the steps taken to make their results reproducible or verifiable.
- Depending on the contribution, reproducibility can be accomplished in various ways. For example, if the contribution is a novel architecture, describing the architecture fully might suffice, or if the contribution is a specific model and empirical evaluation, it may be necessary to either make it possible for others to replicate the model with the same dataset, or provide access to the model. In general, releasing code and data is often one good way to accomplish this, but reproducibility can also be provided via detailed instructions for how to replicate the results, access to a hosted model (e.g., in the case of a large language model), releasing of a model checkpoint, or other means that are appropriate to the research performed.
- While NeurIPS does not require releasing code, the conference does require all submissions to provide some reasonable avenue for reproducibility, which may depend on the nature of the contribution. For example
  - (a) If the contribution is primarily a new algorithm, the paper should make it clear how to reproduce that algorithm.
  - (b) If the contribution is primarily a new model architecture, the paper should describe the architecture clearly and fully.
  - (c) If the contribution is a new model (e.g., a large language model), then there should either be a way to access this model for reproducing the results or a way to reproduce the model (e.g., with an open-source dataset or instructions for how to construct the dataset).
  - (d) We recognize that reproducibility may be tricky in some cases, in which case authors are welcome to describe the particular way they provide for reproducibility. In the case of closed-source models, it may be that access to the model is limited in some way (e.g., to registered users), but it should be possible for other researchers to have some path to reproducing or verifying the results.

#### 5. Open access to data and code

Question: Does the paper provide open access to the data and code, with sufficient instructions to faithfully reproduce the main experimental results, as described in supplemental material?

Answer: [Yes]

Justification: The code and instructions are included in the supplemental materials.

Guidelines:

- The answer NA means that paper does not include experiments requiring code.
- Please see the NeurIPS code and data submission guidelines (<https://nips.cc/public/guides/CodeSubmissionPolicy>) for more details.
- While we encourage the release of code and data, we understand that this might not be possible, so “No” is an acceptable answer. Papers cannot be rejected simply for not including code, unless this is central to the contribution (e.g., for a new open-source benchmark).
- The instructions should contain the exact command and environment needed to run to reproduce the results. See the NeurIPS code and data submission guidelines (<https://nips.cc/public/guides/CodeSubmissionPolicy>) for more details.
- The authors should provide instructions on data access and preparation, including how to access the raw data, preprocessed data, intermediate data, and generated data, etc.
- The authors should provide scripts to reproduce all experimental results for the new proposed method and baselines. If only a subset of experiments are reproducible, they should state which ones are omitted from the script and why.
- At submission time, to preserve anonymity, the authors should release anonymized versions (if applicable).
- Providing as much information as possible in supplemental material (appended to the paper) is recommended, but including URLs to data and code is permitted.

## 6. Experimental setting/details

Question: Does the paper specify all the training and test details (e.g., data splits, hyper-parameters, how they were chosen, type of optimizer, etc.) necessary to understand the results?

Answer: [Yes]

Justification: All of the experiment details and implementation details are presented. See Appendix F.

Guidelines:

- The answer NA means that the paper does not include experiments.
- The experimental setting should be presented in the core of the paper to a level of detail that is necessary to appreciate the results and make sense of them.
- The full details can be provided either with the code, in appendix, or as supplemental material.

## 7. Experiment statistical significance

Question: Does the paper report error bars suitably and correctly defined or other appropriate information about the statistical significance of the experiments?

Answer: [No]

Justification: Following the convention of inverse problem research, we report the performance comparison of all algorithms with a fixed random seed.

Guidelines:

- The answer NA means that the paper does not include experiments.
- The authors should answer "Yes" if the results are accompanied by error bars, confidence intervals, or statistical significance tests, at least for the experiments that support the main claims of the paper.
- The factors of variability that the error bars are capturing should be clearly stated (for example, train/test split, initialization, random drawing of some parameter, or overall run with given experimental conditions).

- The method for calculating the error bars should be explained (closed form formula, call to a library function, bootstrap, etc.)
- The assumptions made should be given (e.g., Normally distributed errors).
- It should be clear whether the error bar is the standard deviation or the standard error of the mean.
- It is OK to report 1-sigma error bars, but one should state it. The authors should preferably report a 2-sigma error bar than state that they have a 96% CI, if the hypothesis of Normality of errors is not verified.
- For asymmetric distributions, the authors should be careful not to show in tables or figures symmetric error bars that would yield results that are out of range (e.g. negative error rates).
- If error bars are reported in tables or plots, The authors should explain in the text how they were calculated and reference the corresponding figures or tables in the text.

## 8. Experiments compute resources

Question: For each experiment, does the paper provide sufficient information on the computer resources (type of compute workers, memory, time of execution) needed to reproduce the experiments?

Answer: [Yes]

Justification: The computer resources needed to reproduce the experiments are provided in Section 5 and Appendix C.4. All of the experiments are conducted on a single NVIDIA 3090 GPU.

Guidelines:

- The answer NA means that the paper does not include experiments.
- The paper should indicate the type of compute workers CPU or GPU, internal cluster, or cloud provider, including relevant memory and storage.
- The paper should provide the amount of compute required for each of the individual experimental runs as well as estimate the total compute.
- The paper should disclose whether the full research project required more compute than the experiments reported in the paper (e.g., preliminary or failed experiments that didn't make it into the paper).

## 9. Code of ethics

Question: Does the research conducted in the paper conform, in every respect, with the NeurIPS Code of Ethics <https://neurips.cc/public/EthicsGuidelines>?

Answer: [Yes]

Justification: We have read the NeurIPS Code of Ethics in detail and conformed with it in this paper.

Guidelines:

- The answer NA means that the authors have not reviewed the NeurIPS Code of Ethics.
- If the authors answer No, they should explain the special circumstances that require a deviation from the Code of Ethics.
- The authors should make sure to preserve anonymity (e.g., if there is a special consideration due to laws or regulations in their jurisdiction).

## 10. Broader impacts

Question: Does the paper discuss both potential positive societal impacts and negative societal impacts of the work performed?

Answer: [NA]

Justification: This paper focuses on improving diffusion-based inverse algorithms under few-step constraint, without underlying social impact.

Guidelines:

- The answer NA means that there is no societal impact of the work performed.



- If the authors answer NA or No, they should explain why their work has no societal impact or why the paper does not address societal impact.
- Examples of negative societal impacts include potential malicious or unintended uses (e.g., disinformation, generating fake profiles, surveillance), fairness considerations (e.g., deployment of technologies that could make decisions that unfairly impact specific groups), privacy considerations, and security considerations.
- The conference expects that many papers will be foundational research and not tied to particular applications, let alone deployments. However, if there is a direct path to any negative applications, the authors should point it out. For example, it is legitimate to point out that an improvement in the quality of generative models could be used to generate deepfakes for disinformation. On the other hand, it is not needed to point out that a generic algorithm for optimizing neural networks could enable people to train models that generate Deepfakes faster.
- The authors should consider possible harms that could arise when the technology is being used as intended and functioning correctly, harms that could arise when the technology is being used as intended but gives incorrect results, and harms following from (intentional or unintentional) misuse of the technology.
- If there are negative societal impacts, the authors could also discuss possible mitigation strategies (e.g., gated release of models, providing defenses in addition to attacks, mechanisms for monitoring misuse, mechanisms to monitor how a system learns from feedback over time, improving the efficiency and accessibility of ML).

## 11. Safeguards

Question: Does the paper describe safeguards that have been put in place for responsible release of data or models that have a high risk for misuse (e.g., pretrained language models, image generators, or scraped datasets)?

Answer: [NA]

Justification: No datasets or models are proposed and there is no such risk of misuse.

Guidelines:

- The answer NA means that the paper poses no such risks.
- Released models that have a high risk for misuse or dual-use should be released with necessary safeguards to allow for controlled use of the model, for example by requiring that users adhere to usage guidelines or restrictions to access the model or implementing safety filters.
- Datasets that have been scraped from the Internet could pose safety risks. The authors should describe how they avoided releasing unsafe images.
- We recognize that providing effective safeguards is challenging, and many papers do not require this, but we encourage authors to take this into account and make a best faith effort.

## 12. Licenses for existing assets

Question: Are the creators or original owners of assets (e.g., code, data, models), used in the paper, properly credited and are the license and terms of use explicitly mentioned and properly respected?

Answer: [Yes]

Justification: All databases, models, and toolkits used in this paper are cited from the original papers.

Guidelines:

- The answer NA means that the paper does not use existing assets.
- The authors should cite the original paper that produced the code package or dataset.
- The authors should state which version of the asset is used and, if possible, include a URL.
- The name of the license (e.g., CC-BY 4.0) should be included for each asset.
- For scraped data from a particular source (e.g., website), the copyright and terms of service of that source should be provided.



- If assets are released, the license, copyright information, and terms of use in the package should be provided. For popular datasets, [paperswithcode.com/datasets](https://paperswithcode.com/datasets) has curated licenses for some datasets. Their licensing guide can help determine the license of a dataset.
- For existing datasets that are re-packaged, both the original license and the license of the derived asset (if it has changed) should be provided.
- If this information is not available online, the authors are encouraged to reach out to the asset's creators.

### 13. New assets

Question: Are new assets introduced in the paper well documented and is the documentation provided alongside the assets?

Answer: [Yes]

Justification: The code provided in the supplementary materials is anonymized and well documented with the running details.

Guidelines:

- The answer NA means that the paper does not release new assets.
- Researchers should communicate the details of the dataset/code/model as part of their submissions via structured templates. This includes details about training, license, limitations, etc.
- The paper should discuss whether and how consent was obtained from people whose asset is used.
- At submission time, remember to anonymize your assets (if applicable). You can either create an anonymized URL or include an anonymized zip file.

### 14. Crowdsourcing and research with human subjects

Question: For crowdsourcing experiments and research with human subjects, does the paper include the full text of instructions given to participants and screenshots, if applicable, as well as details about compensation (if any)?

Answer: [NA]

Justification: This paper does not involve crowdsourcing nor research with human subjects.

Guidelines:

- The answer NA means that the paper does not involve crowdsourcing nor research with human subjects.
- Including this information in the supplemental material is fine, but if the main contribution of the paper involves human subjects, then as much detail as possible should be included in the main paper.
- According to the NeurIPS Code of Ethics, workers involved in data collection, curation, or other labor should be paid at least the minimum wage in the country of the data collector.

### 15. Institutional review board (IRB) approvals or equivalent for research with human subjects

Question: Does the paper describe potential risks incurred by study participants, whether such risks were disclosed to the subjects, and whether Institutional Review Board (IRB) approvals (or an equivalent approval/review based on the requirements of your country or institution) were obtained?

Answer: [NA]

Justification: This paper does not involve crowdsourcing nor research with human subjects.

Guidelines:

- The answer NA means that the paper does not involve crowdsourcing nor research with human subjects.
- Depending on the country in which research is conducted, IRB approval (or equivalent) may be required for any human subjects research. If you obtained IRB approval, you should clearly state this in the paper.

- 1071 • We recognize that the procedures for this may vary significantly between institutions  
1072 and locations, and we expect authors to adhere to the NeurIPS Code of Ethics and the  
1073 guidelines for their institution.
- 1074 • For initial submissions, do not include any information that would break anonymity (if  
1075 applicable), such as the institution conducting the review.

#### 1076 16. **Declaration of LLM usage**

1077 Question: Does the paper describe the usage of LLMs if it is an important, original, or  
1078 non-standard component of the core methods in this research? Note that if the LLM is used  
1079 only for writing, editing, or formatting purposes and does not impact the core methodology,  
1080 scientific rigor, or originality of the research, declaration is not required.

1081 Answer: [NA]

1082 Justification: We did not use any large language model in the development of our core  
1083 methods.

1084 Guidelines:

- 1085 • The answer NA means that the core method development in this research does not  
1086 involve LLMs as any important, original, or non-standard components.
- 1087 • Please refer to our LLM policy (<https://neurips.cc/Conferences/2025/LLM>)  
1088 for what should or should not be described.
